# Supplementary material
Source: PubMed Central journal article supplement (PMC5559334)

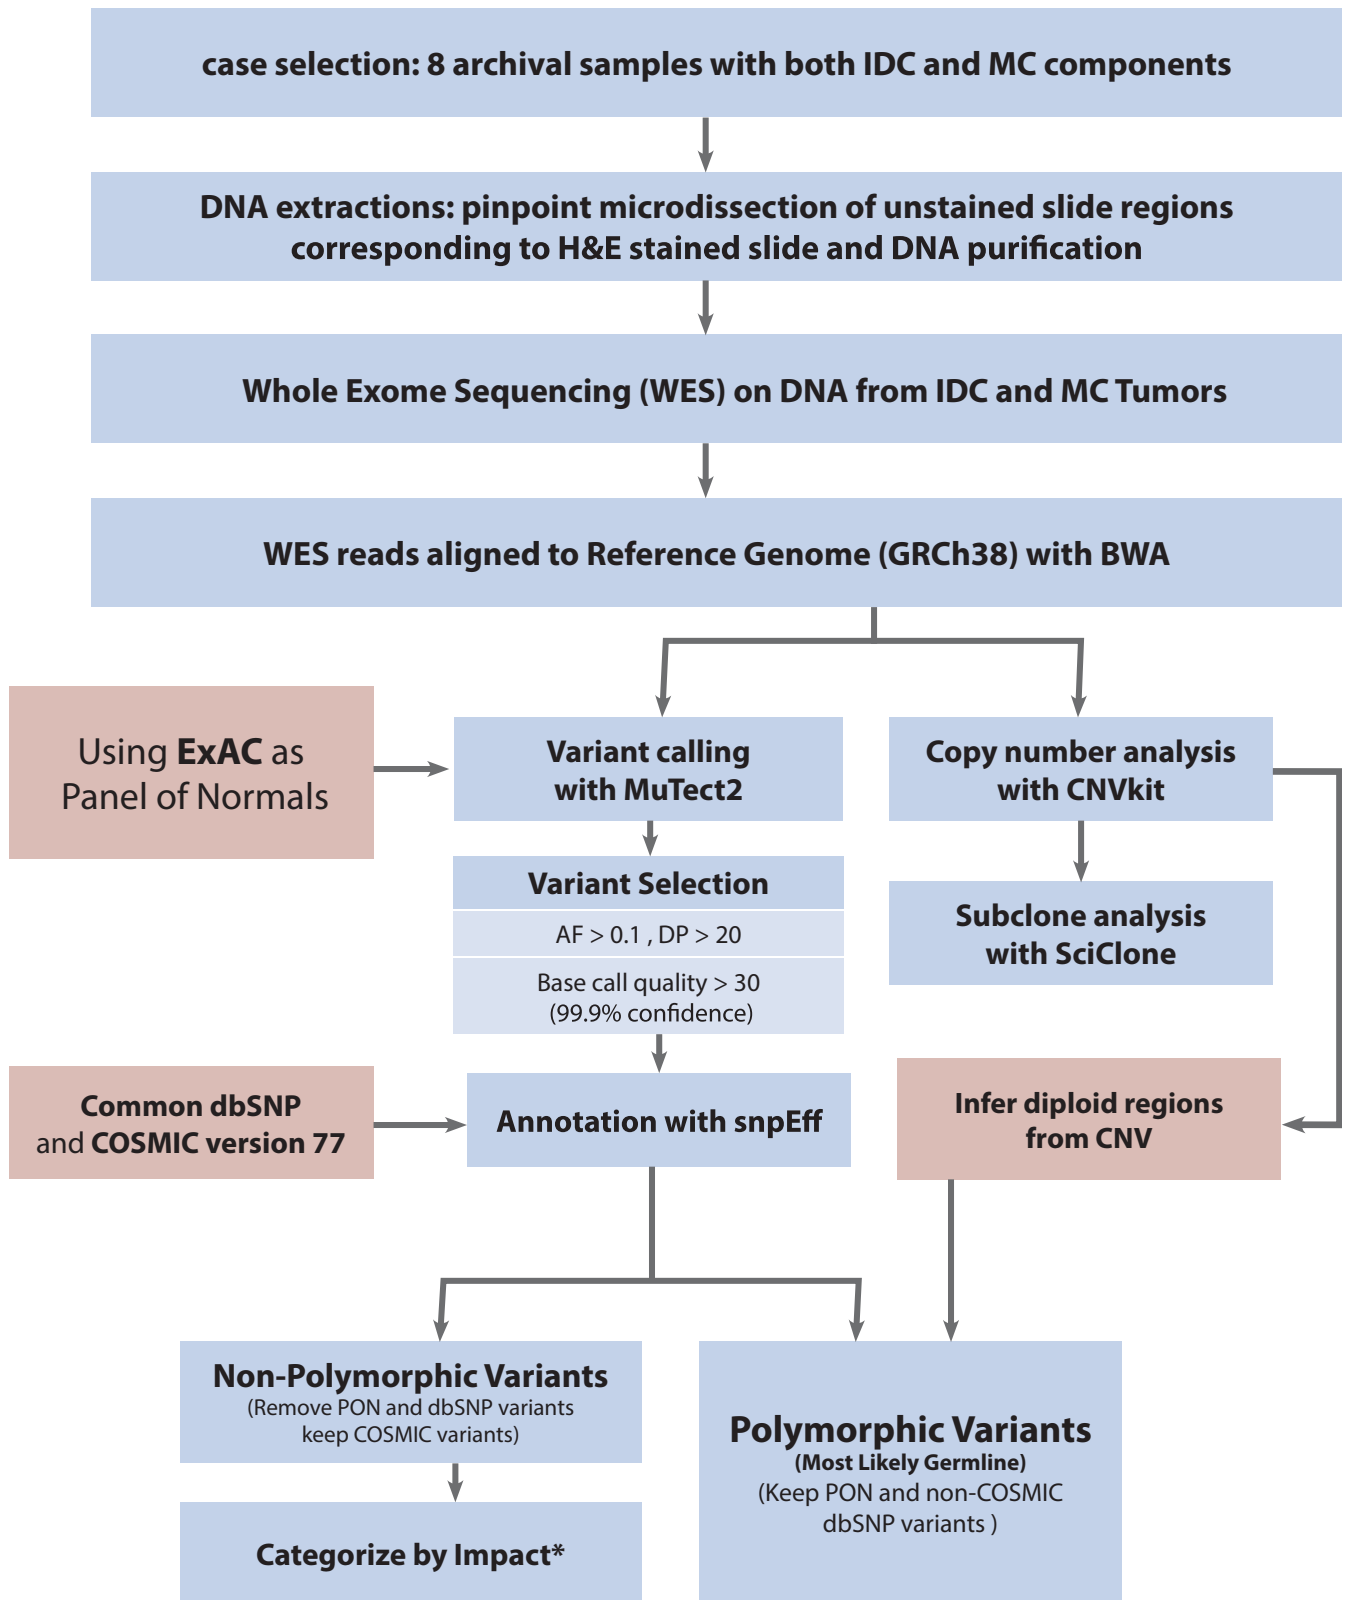

\* Impact: High, Moderate, Low

Supplement: NIHMS869886-supplement-2.pdf [file NIHMS869886-supplement-2.pdf]

# Patient A

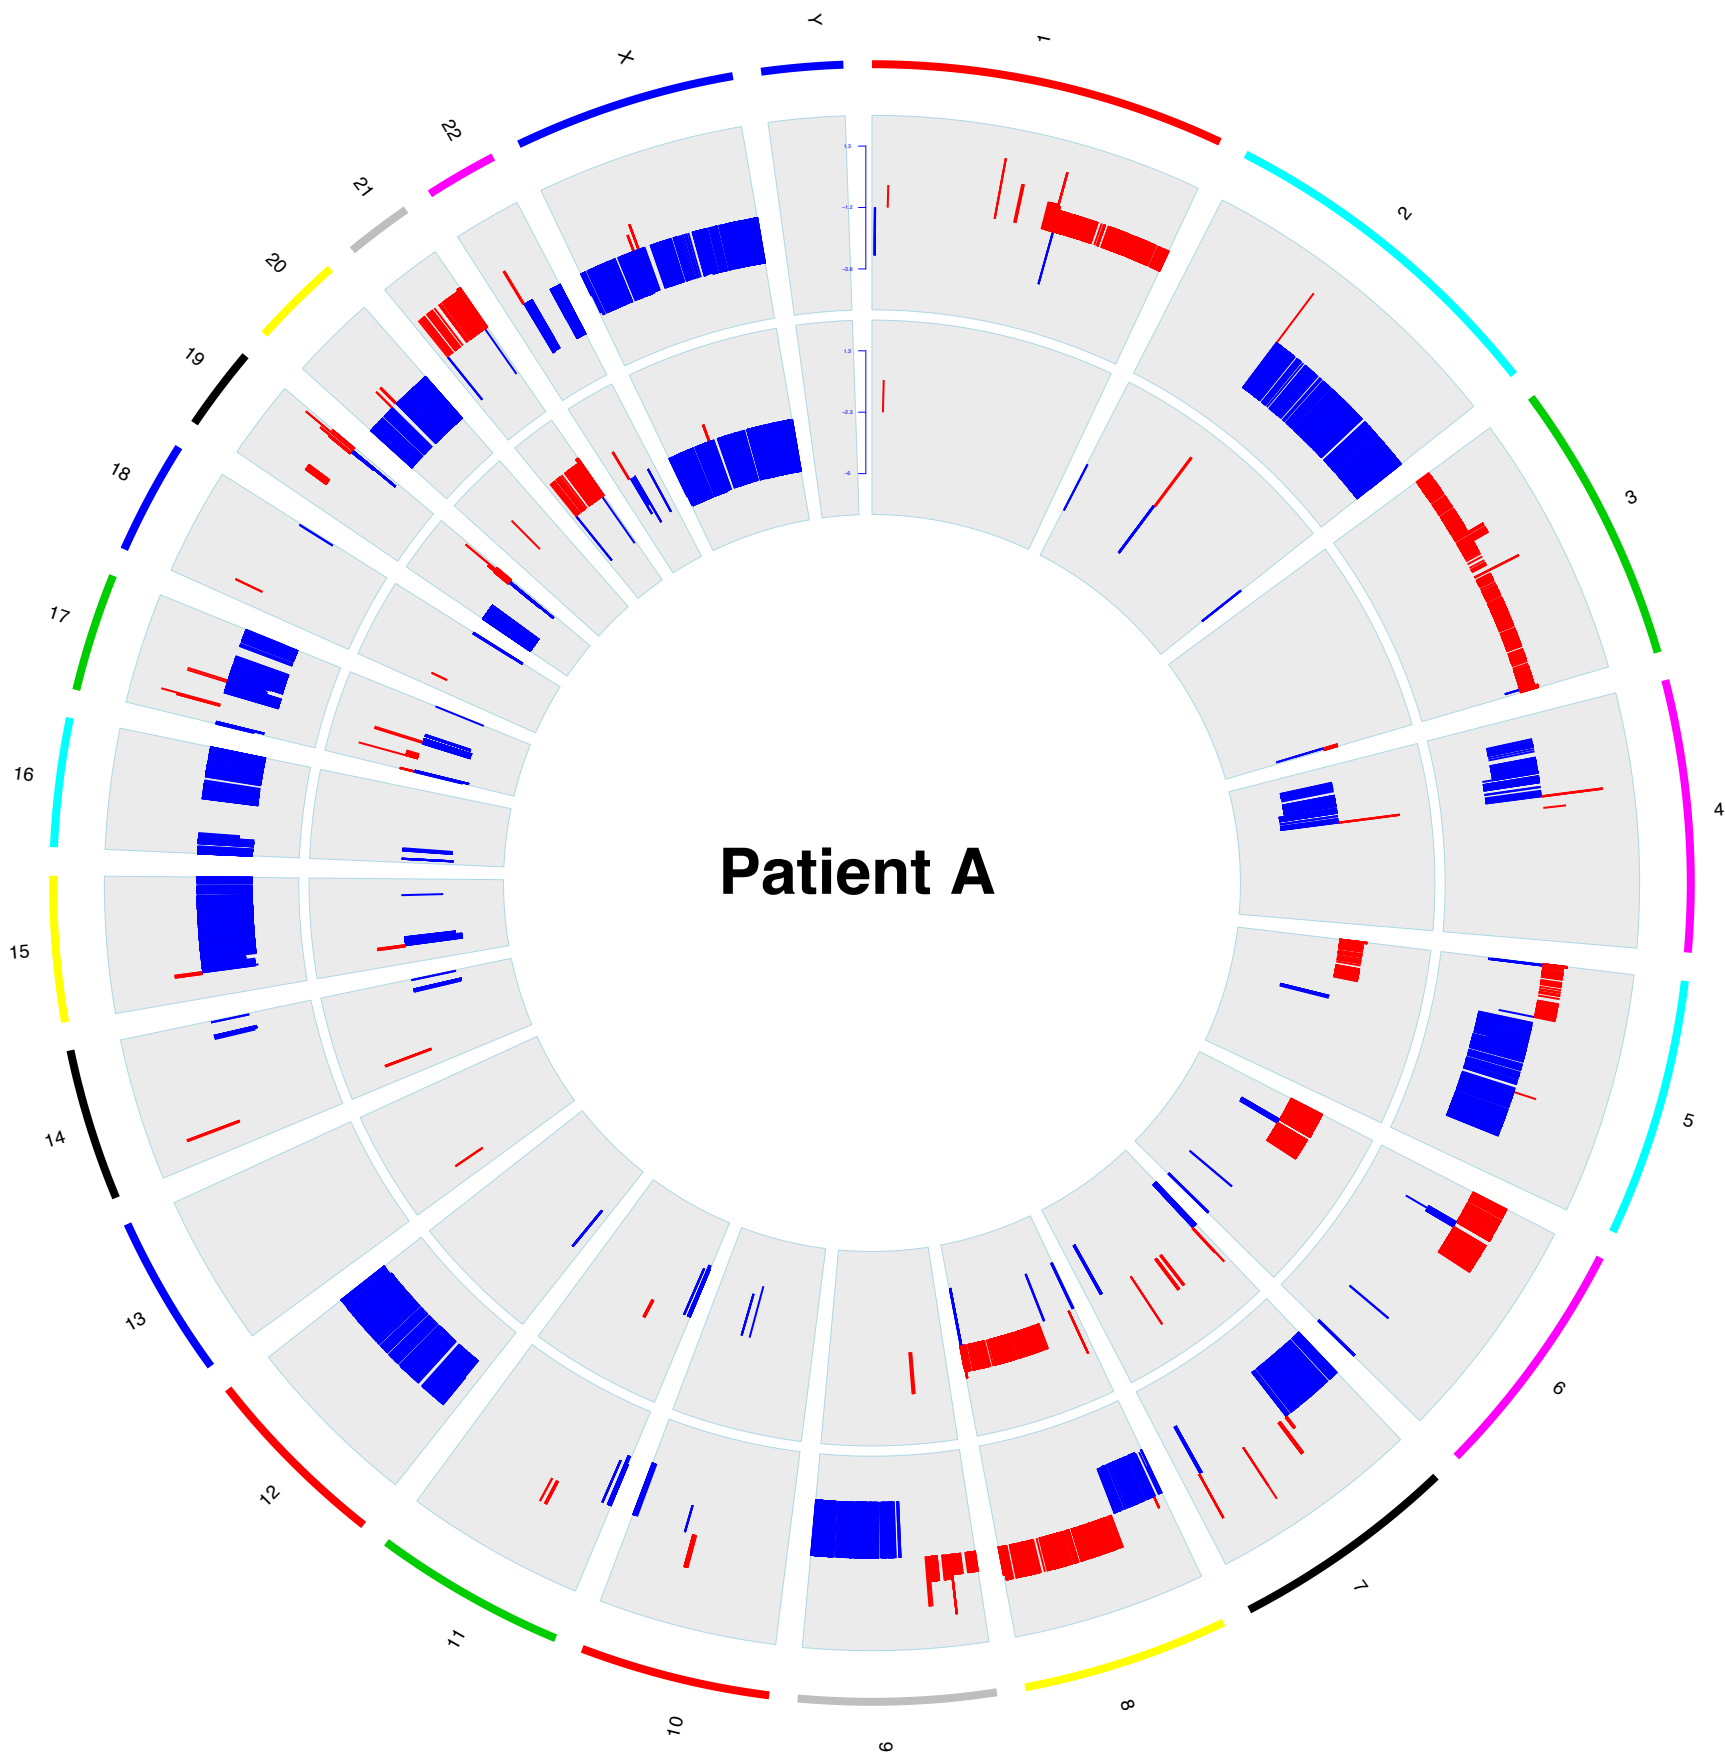

# Patient B

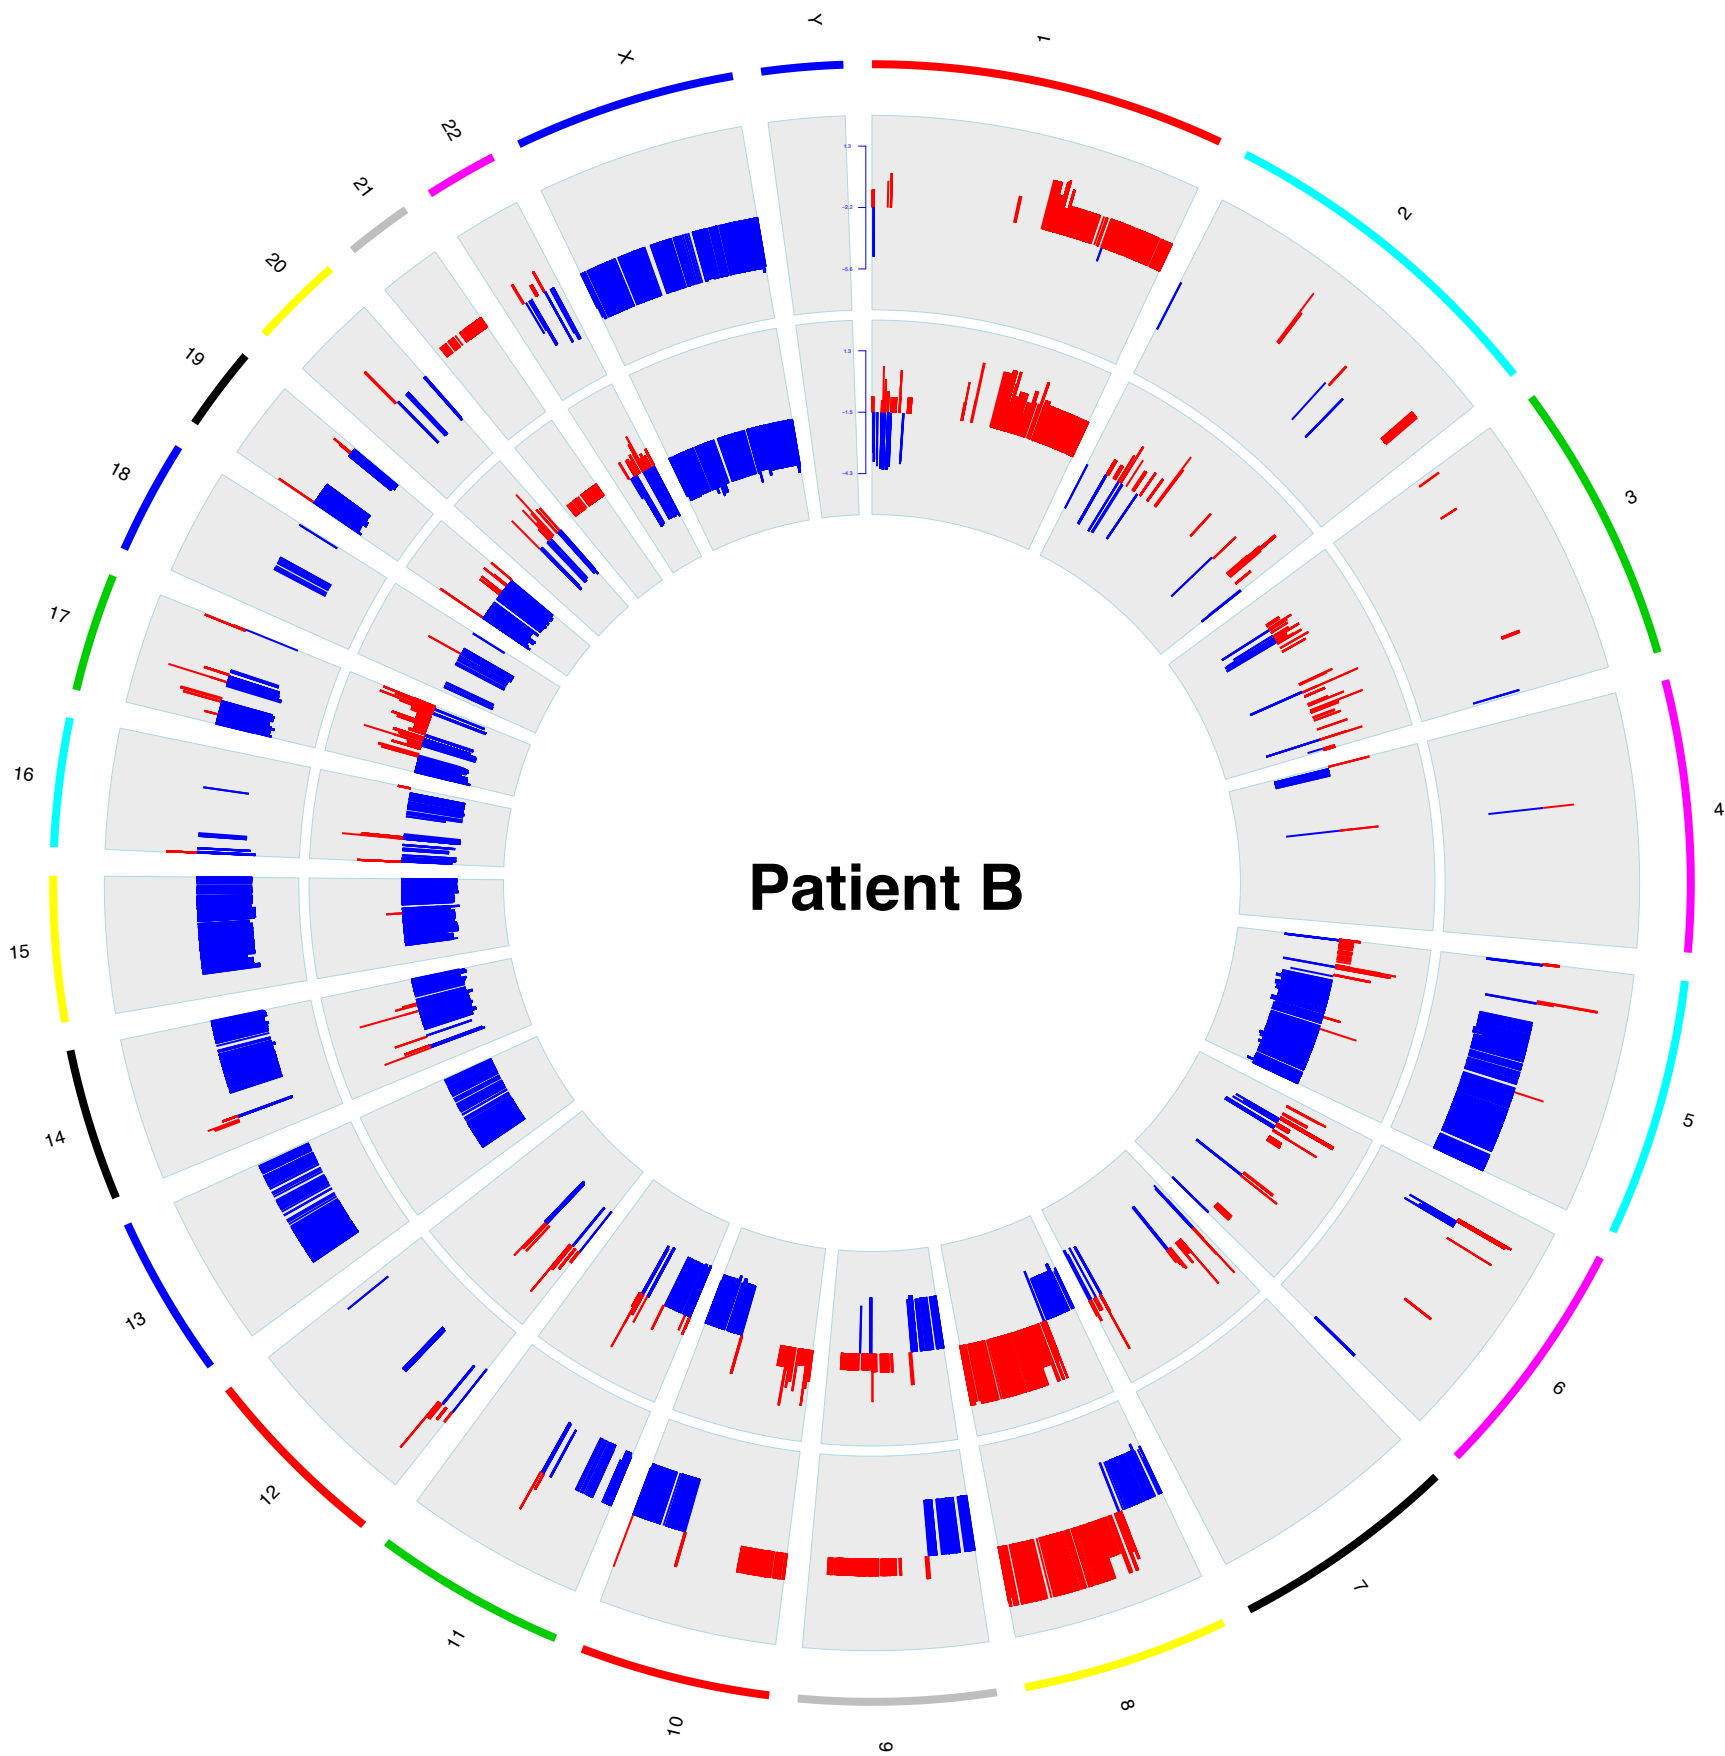

# Patient C

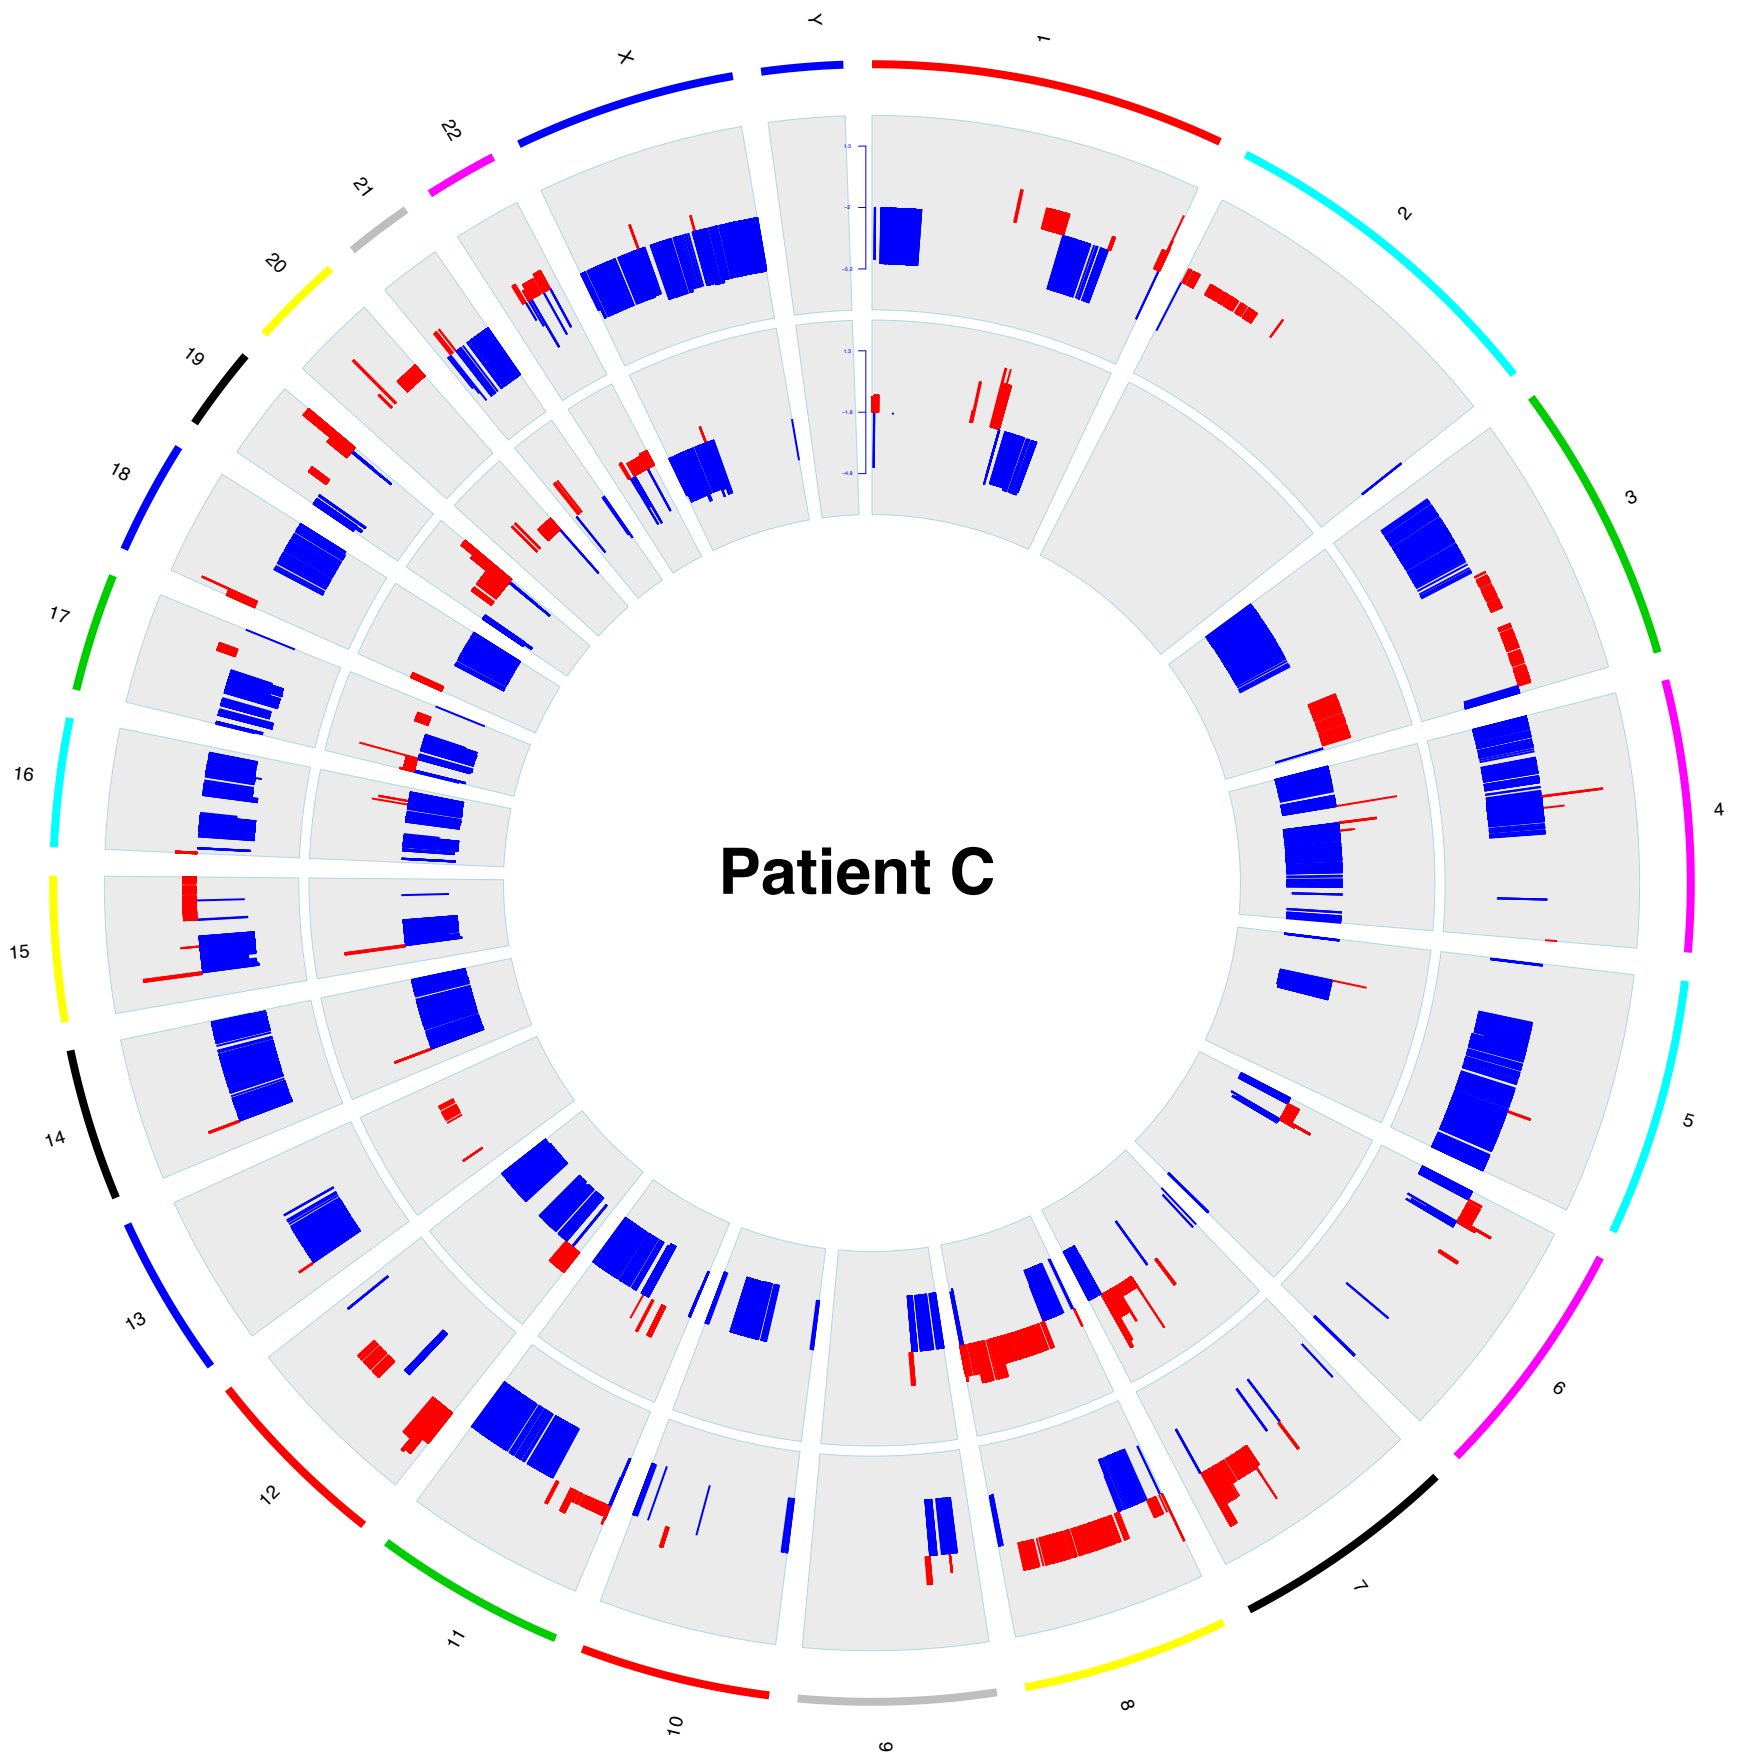

**Patient D**

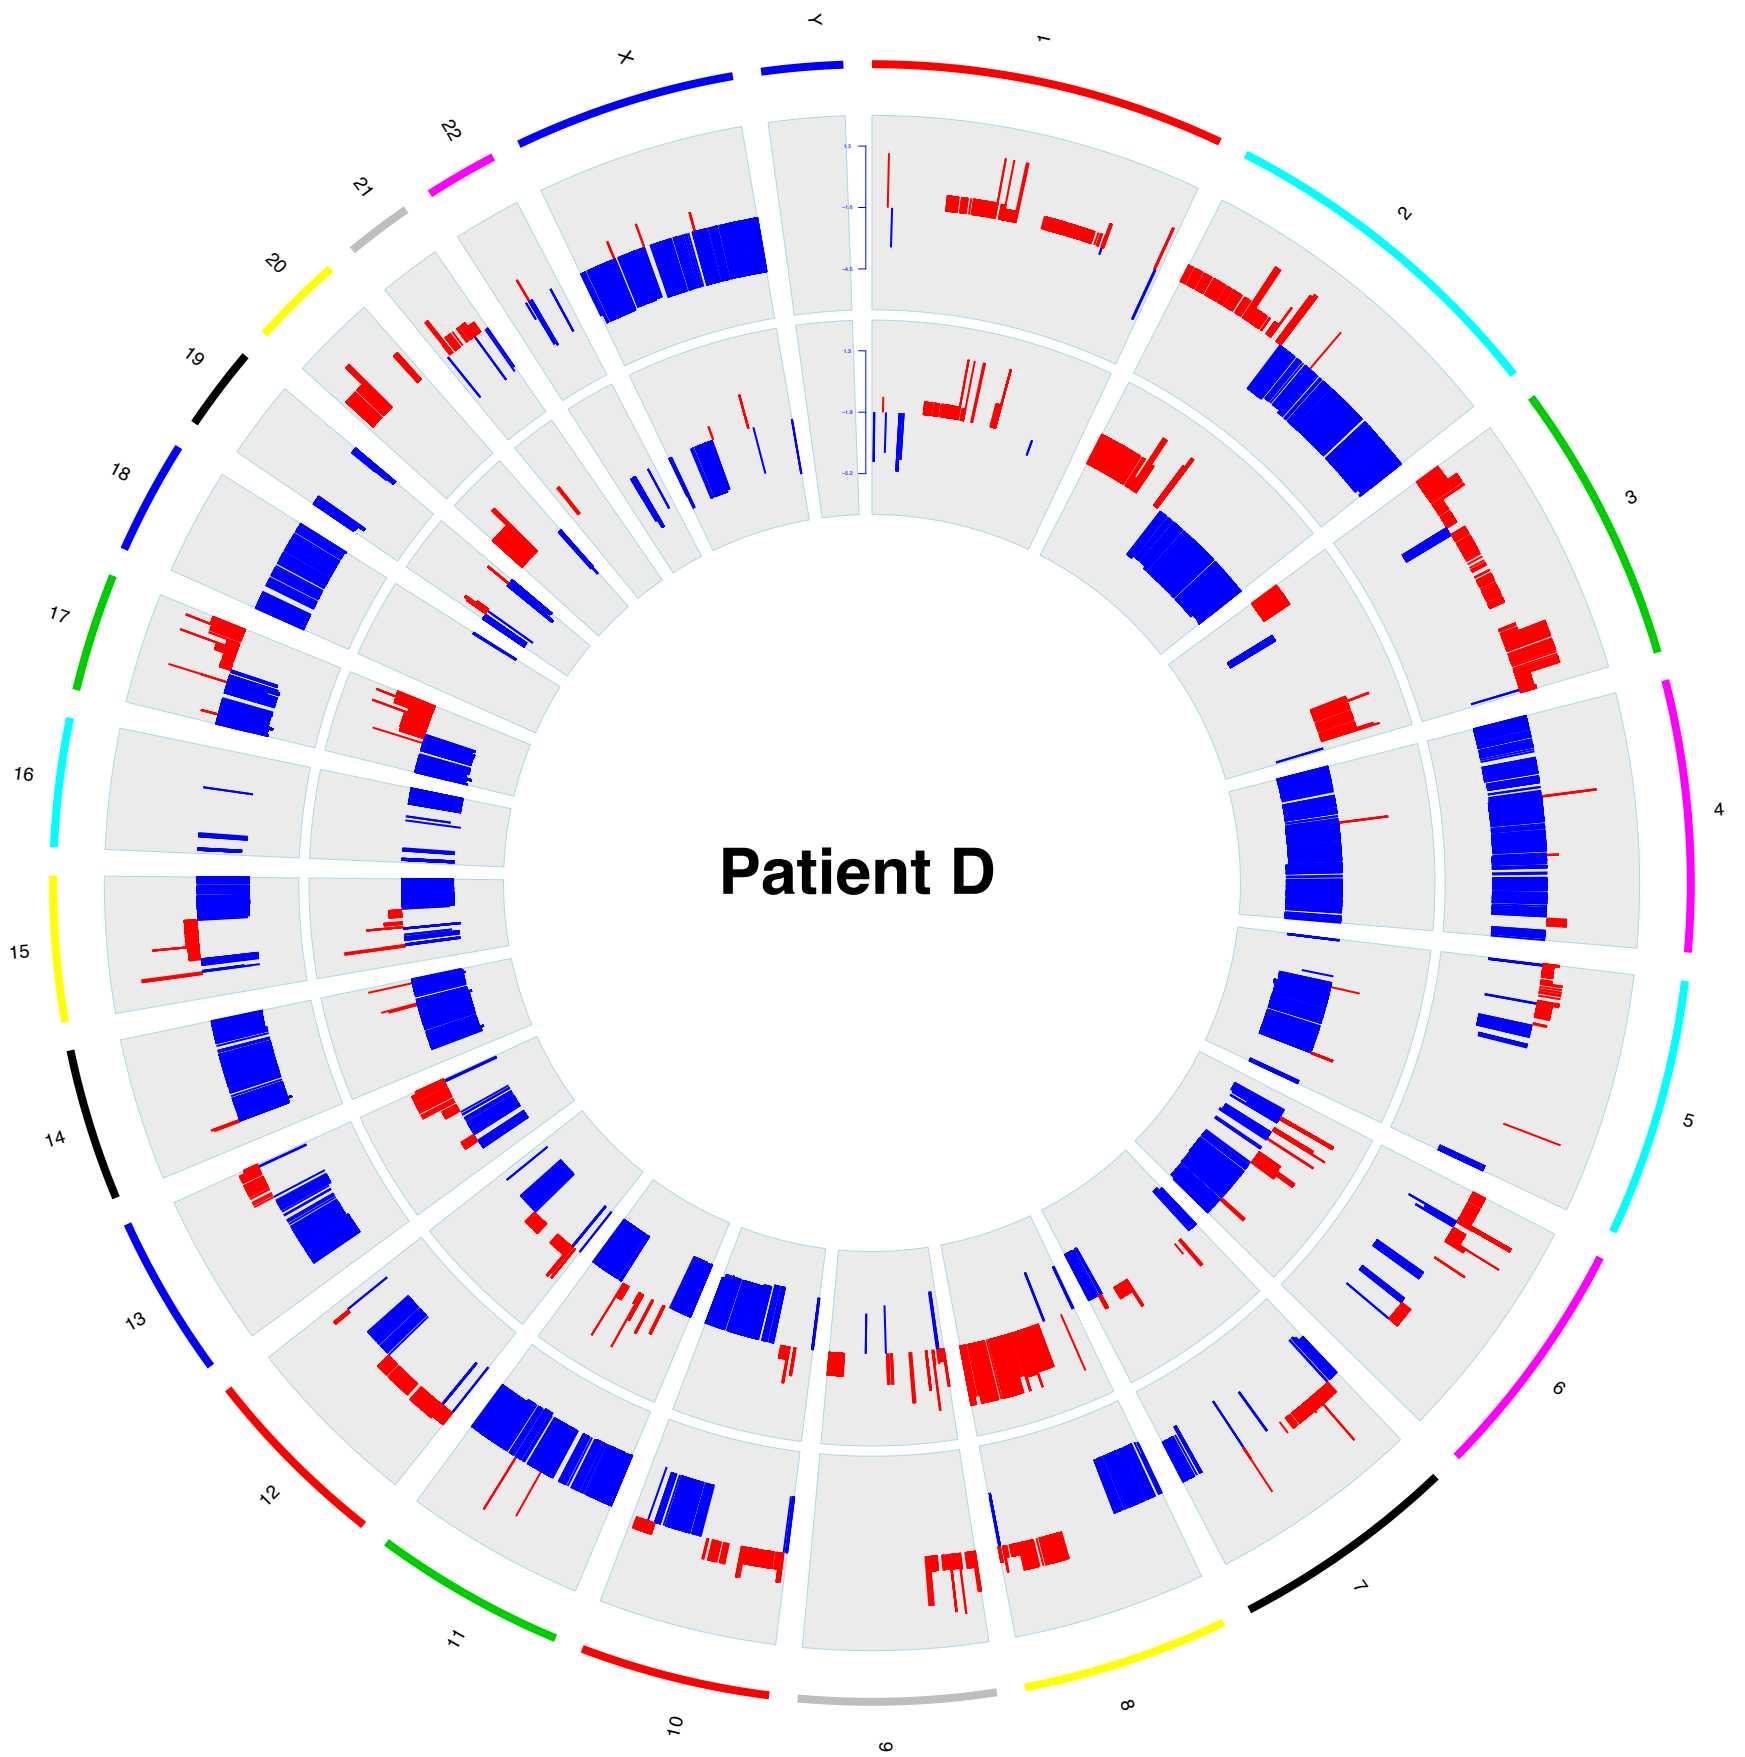

**Patient E**

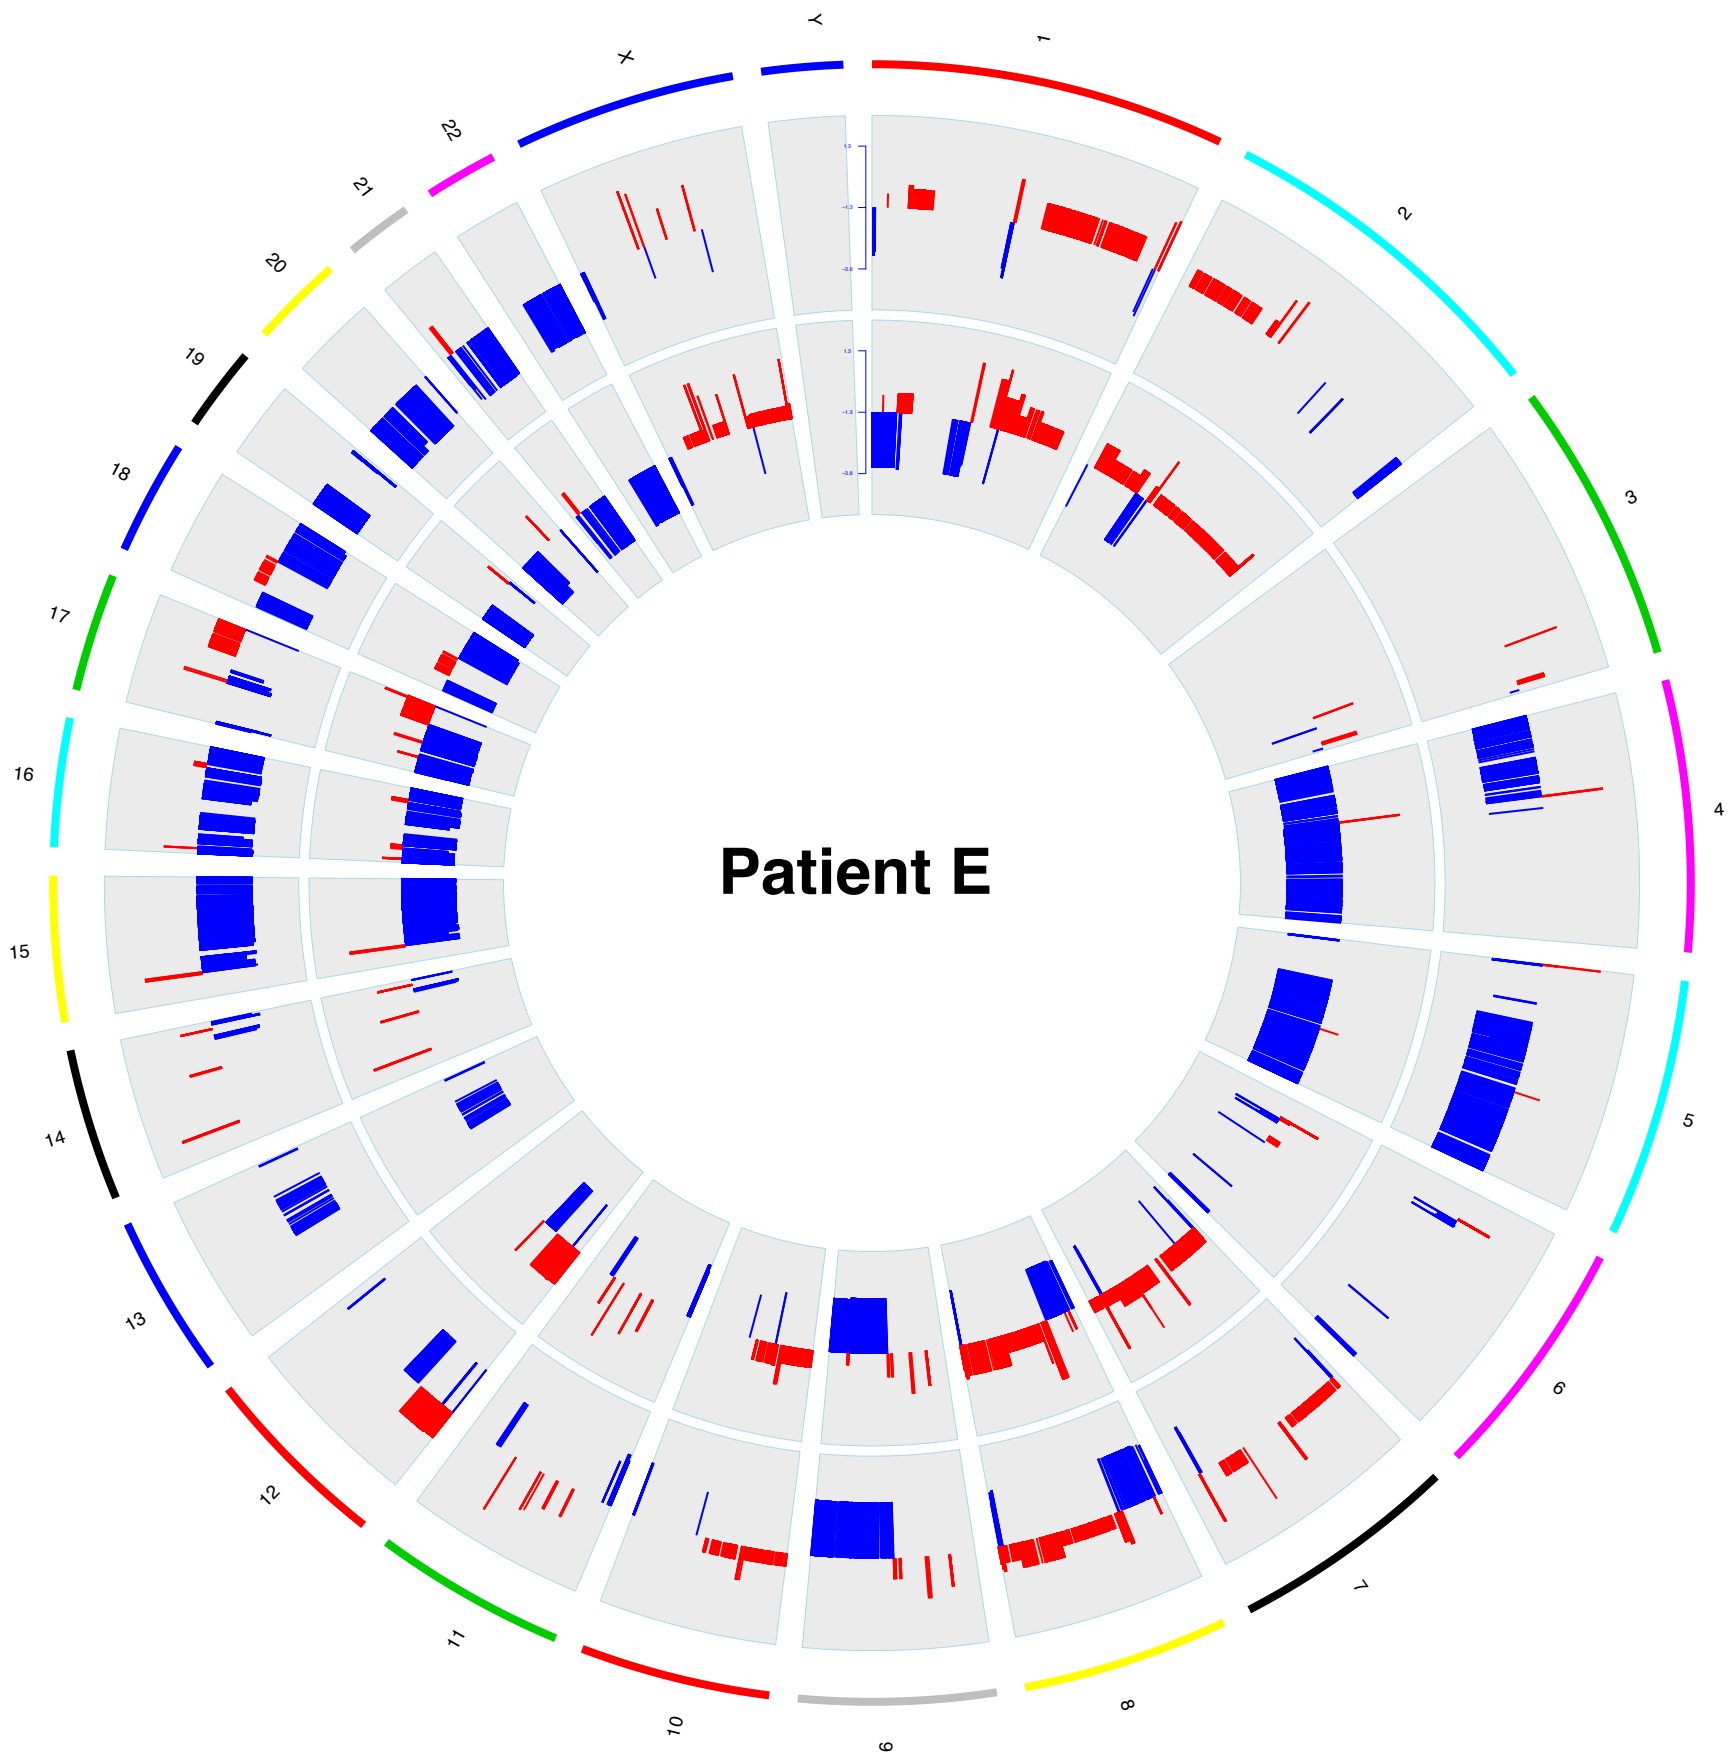

Patient F

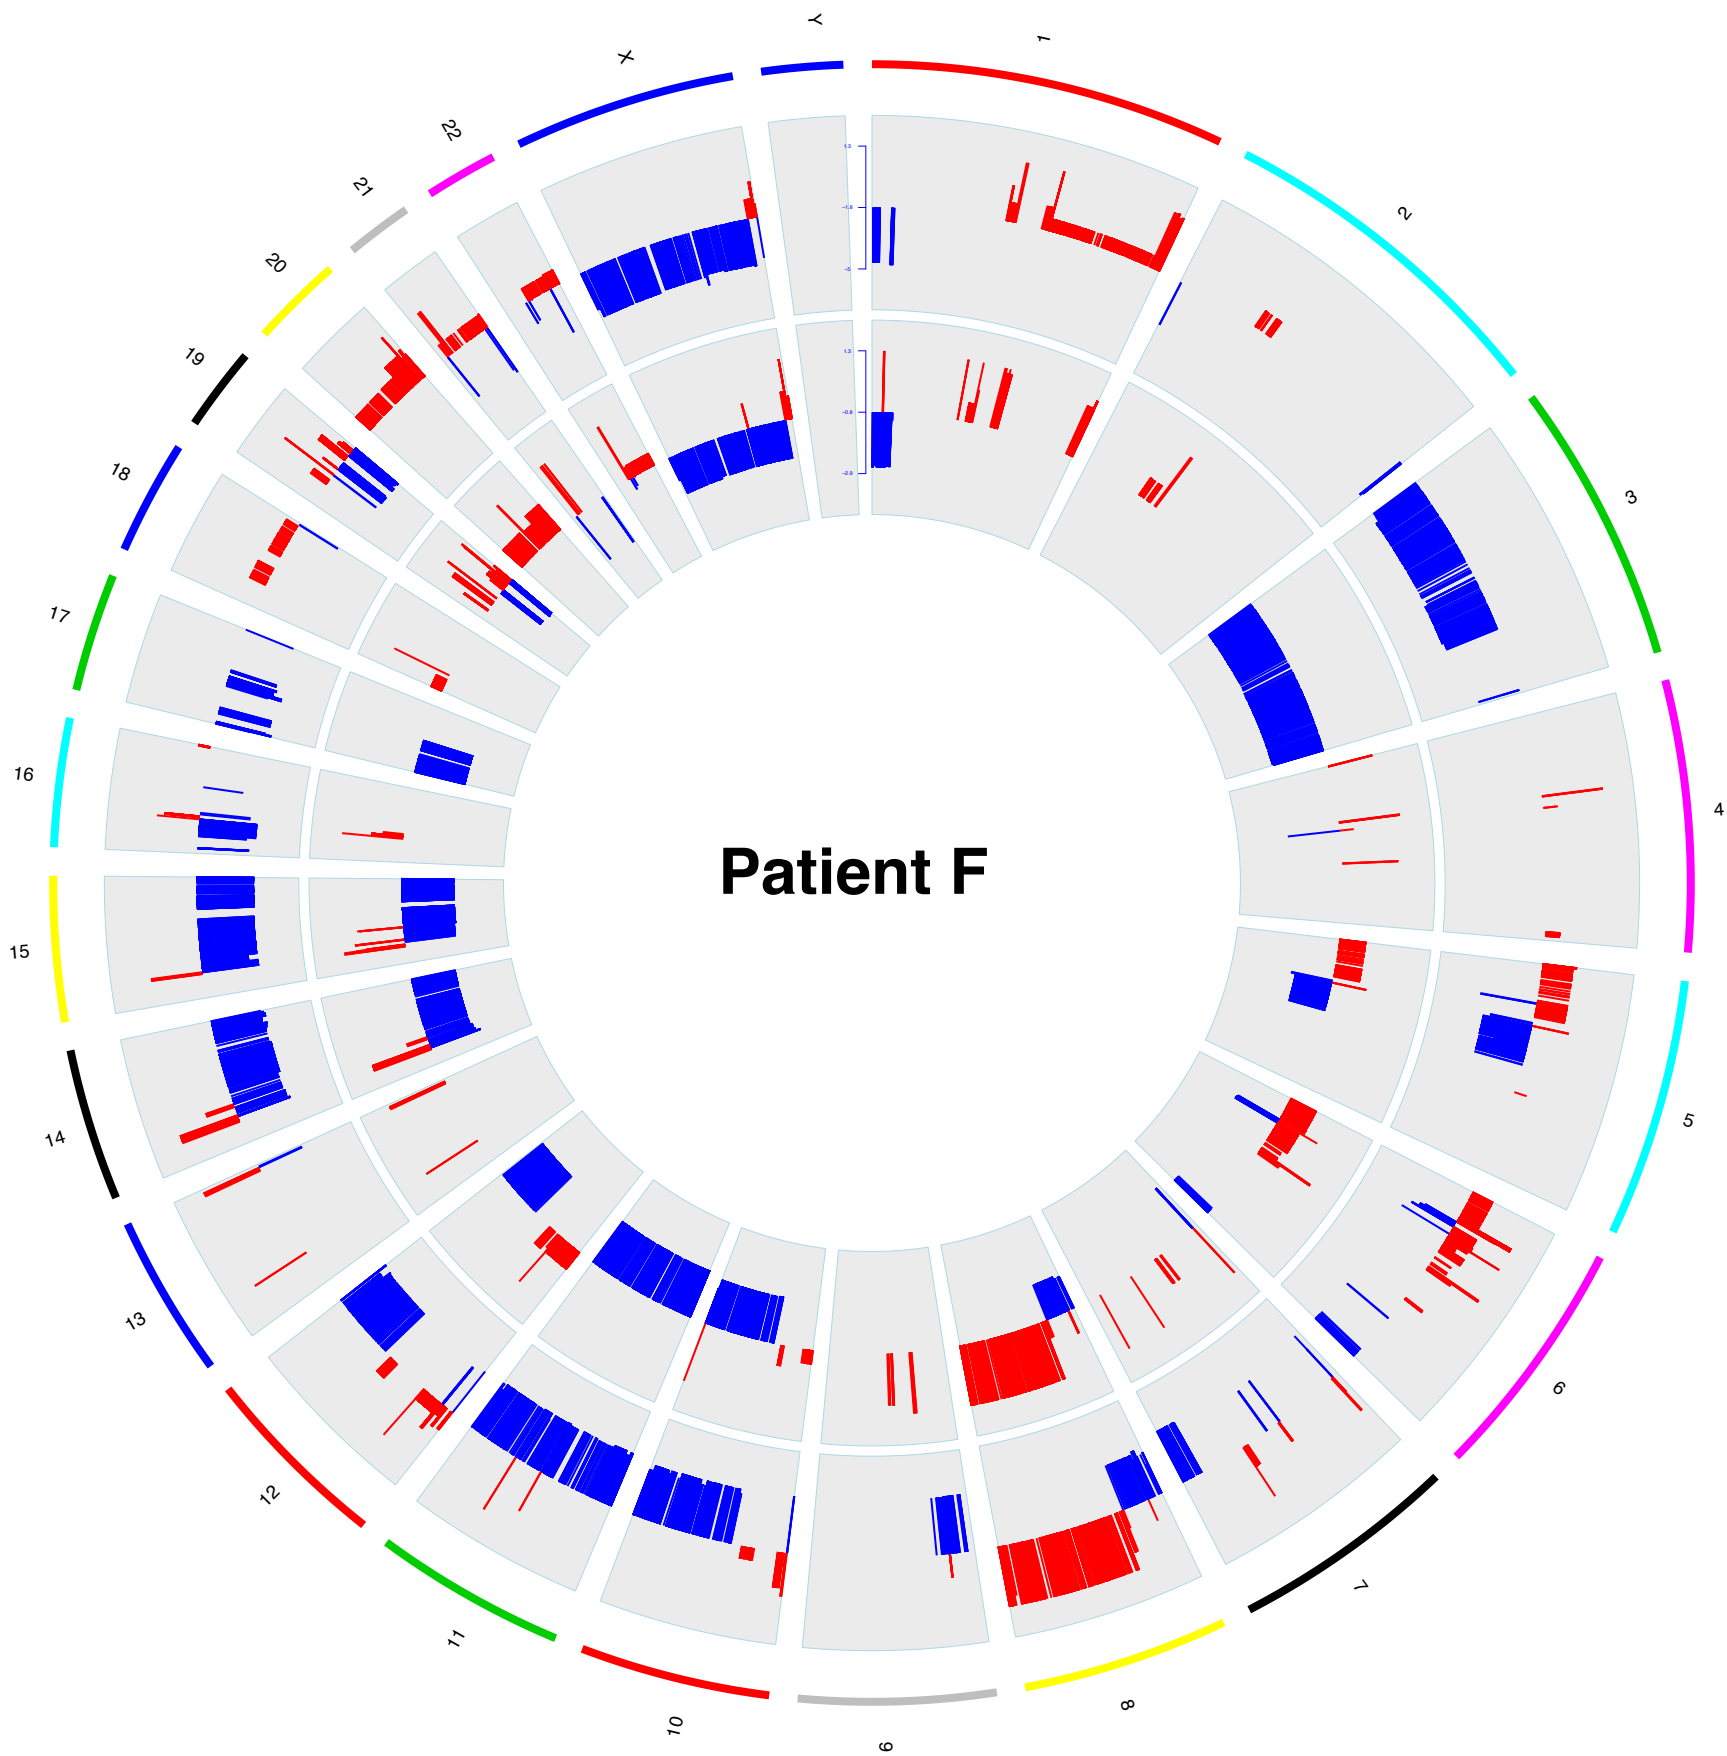

# Patient G

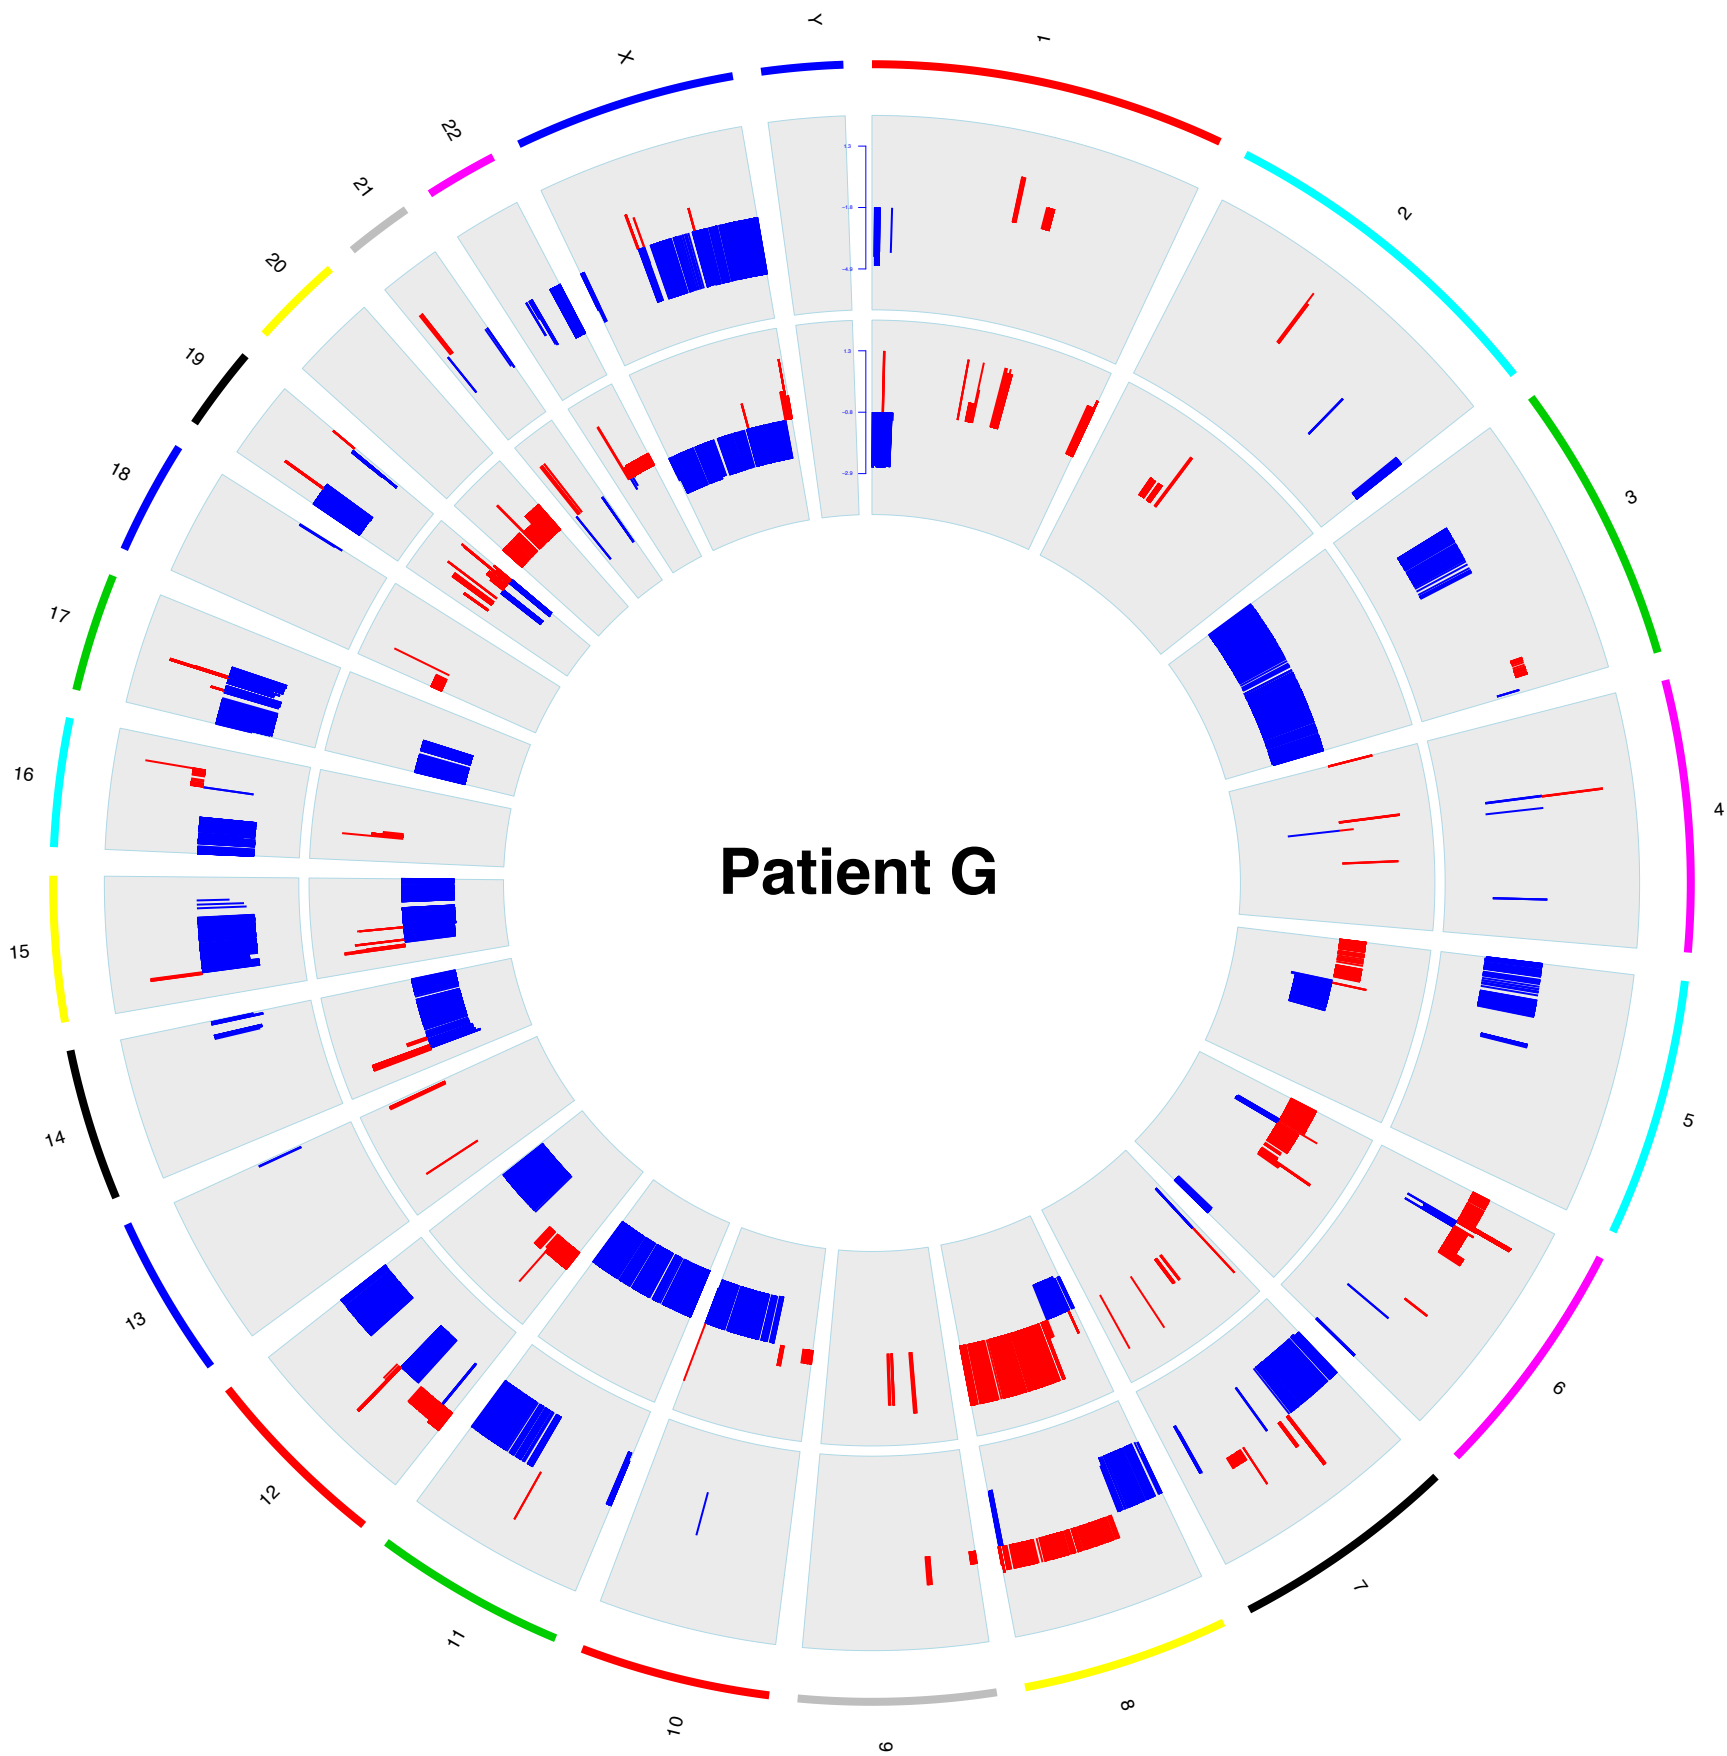

# Patient H

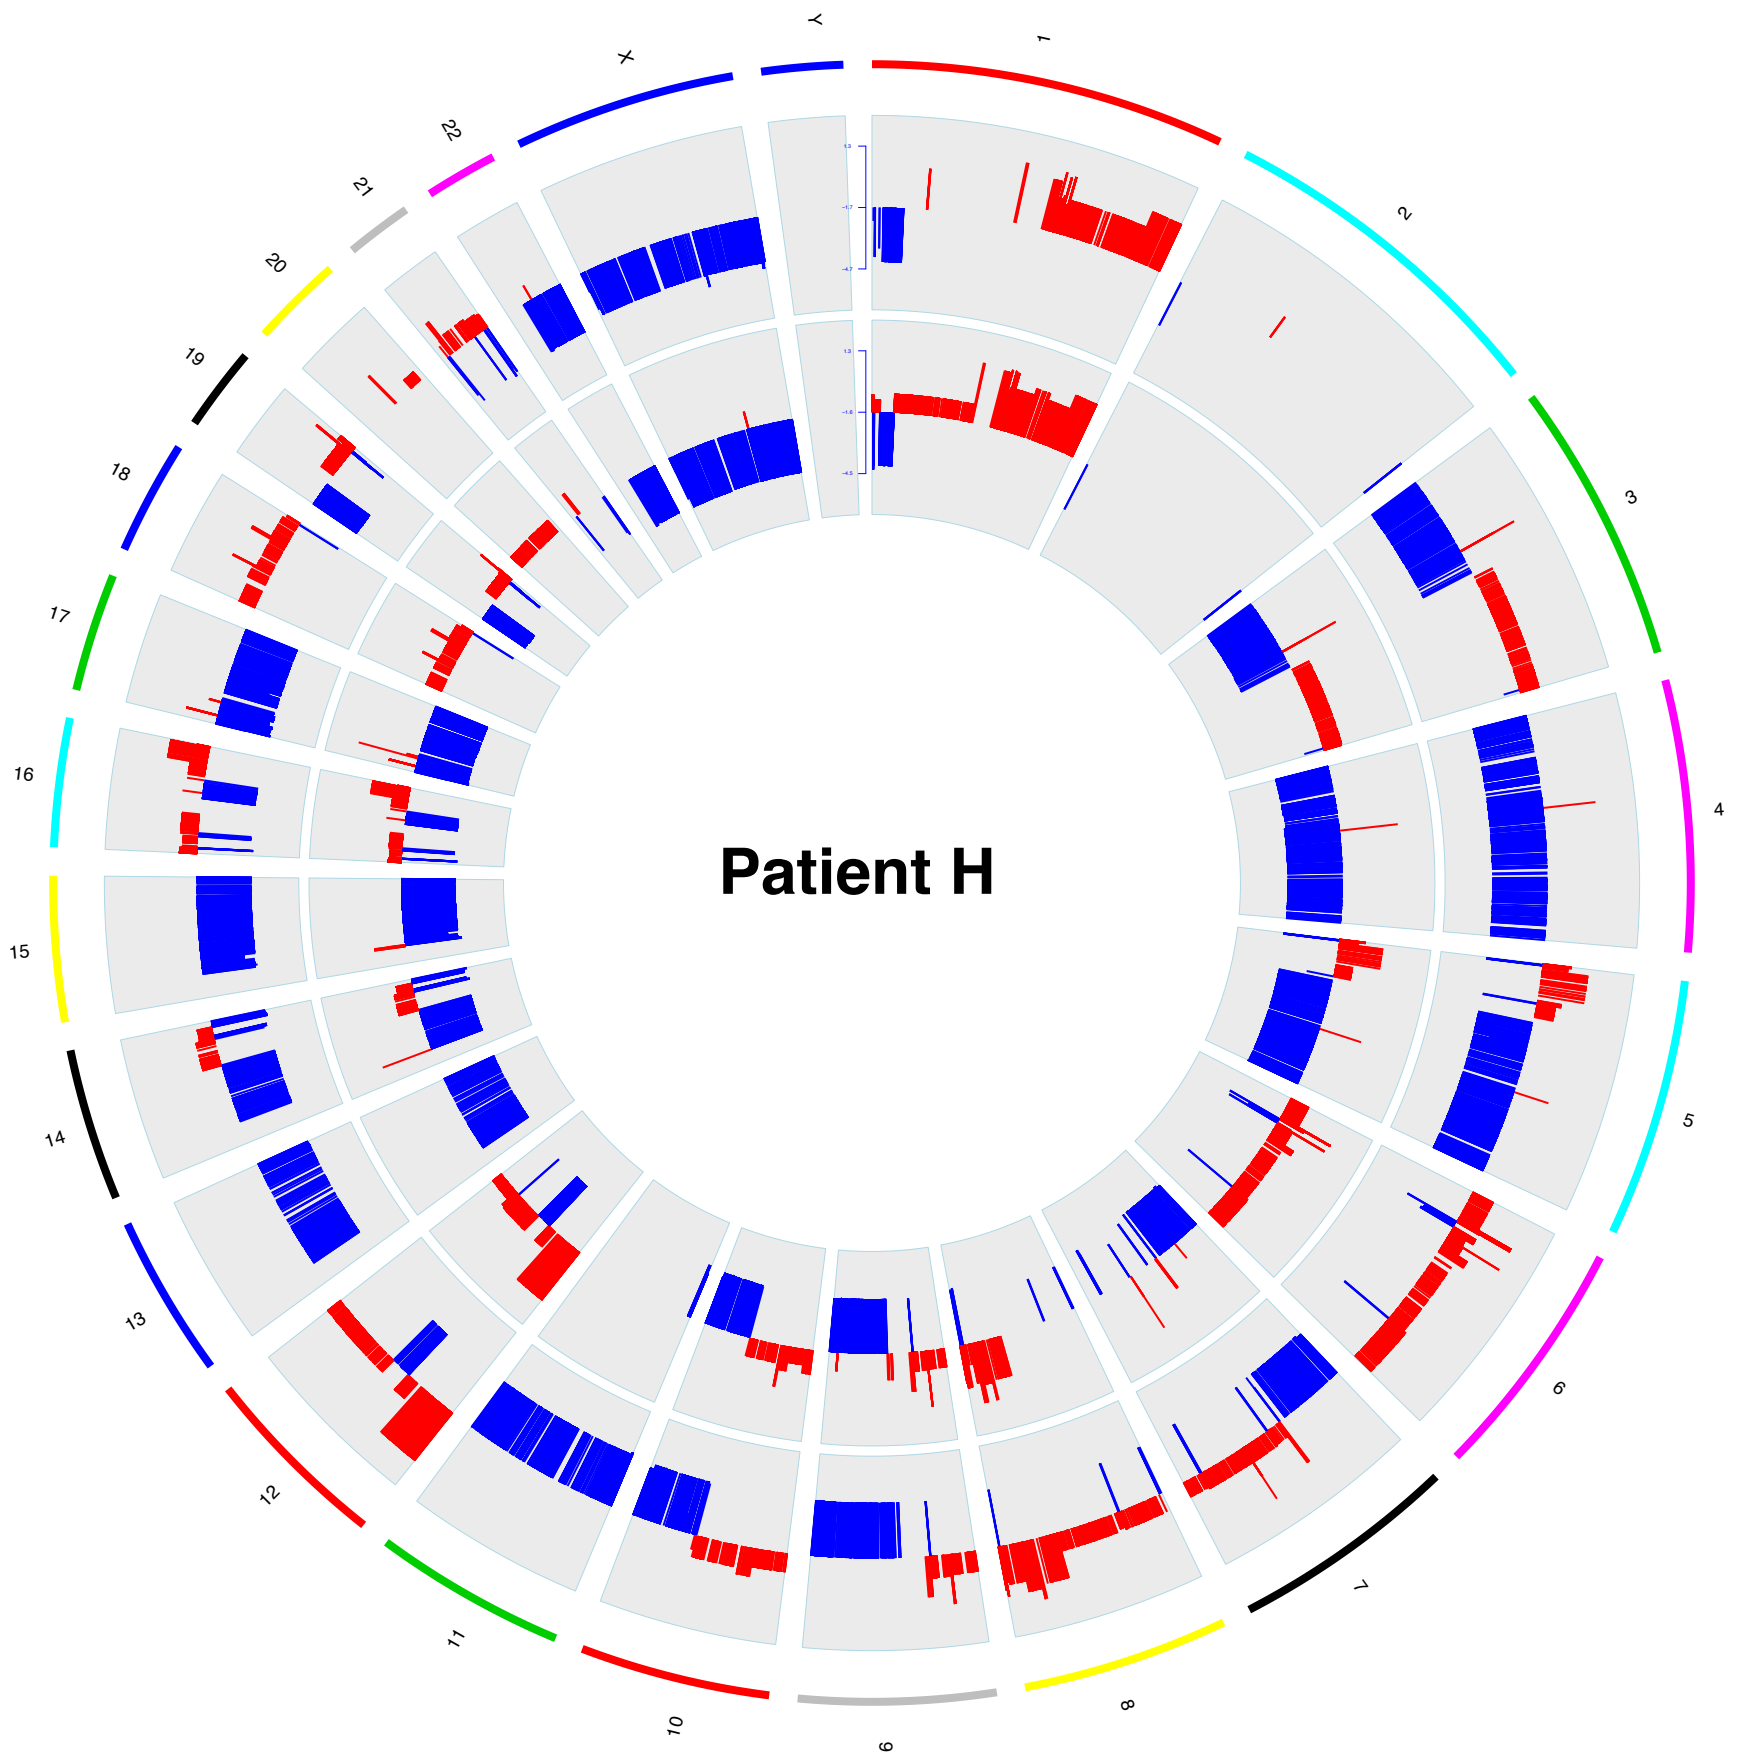

Supplement: NIHMS869886-supplement-3.pdf [file NIHMS869886-supplement-3.pdf]

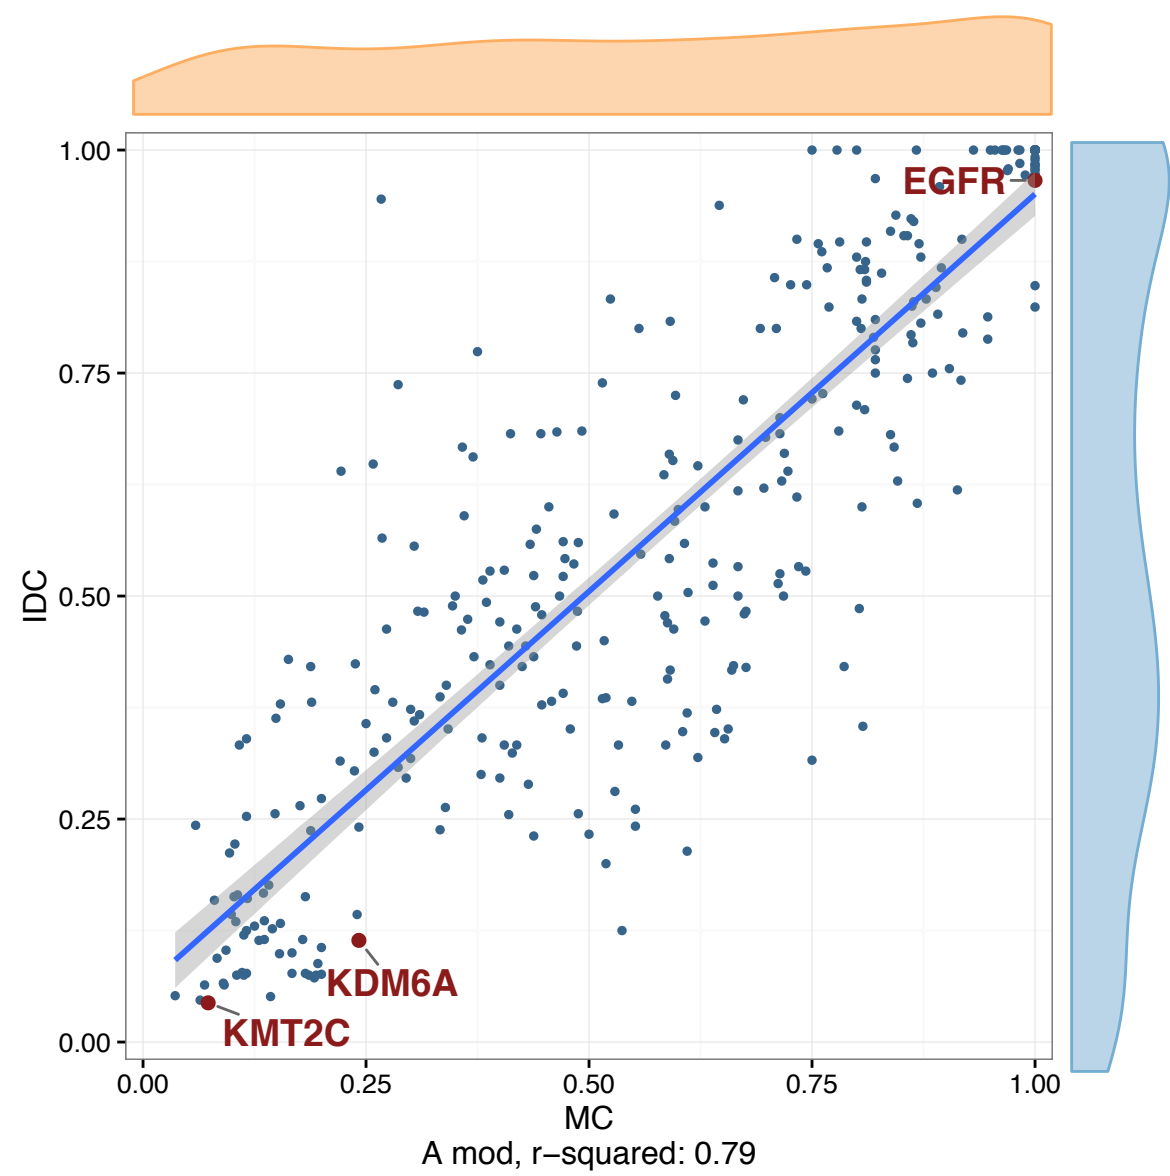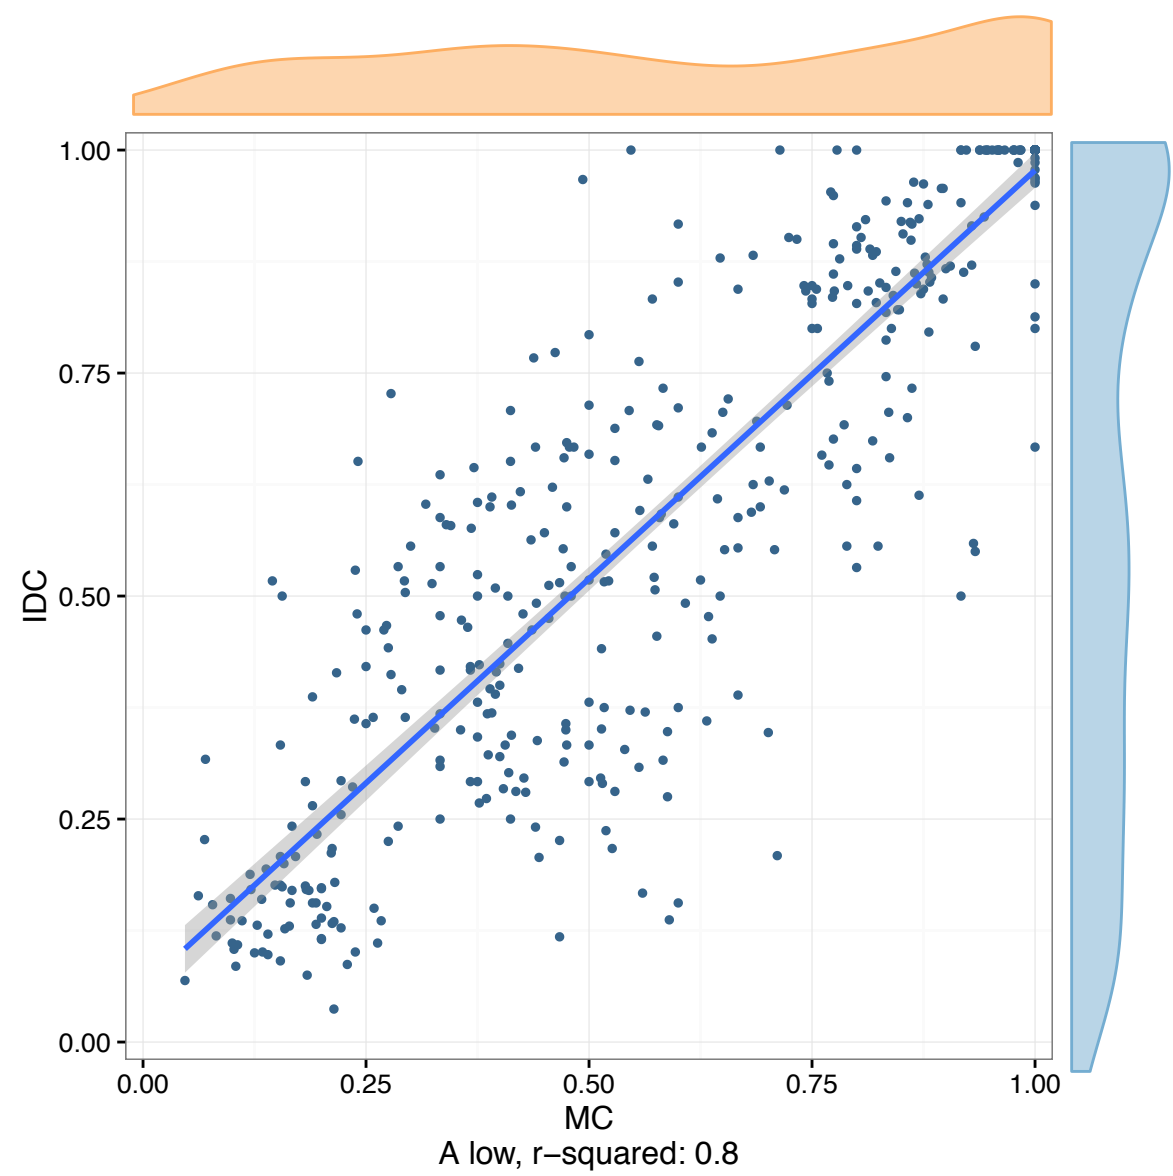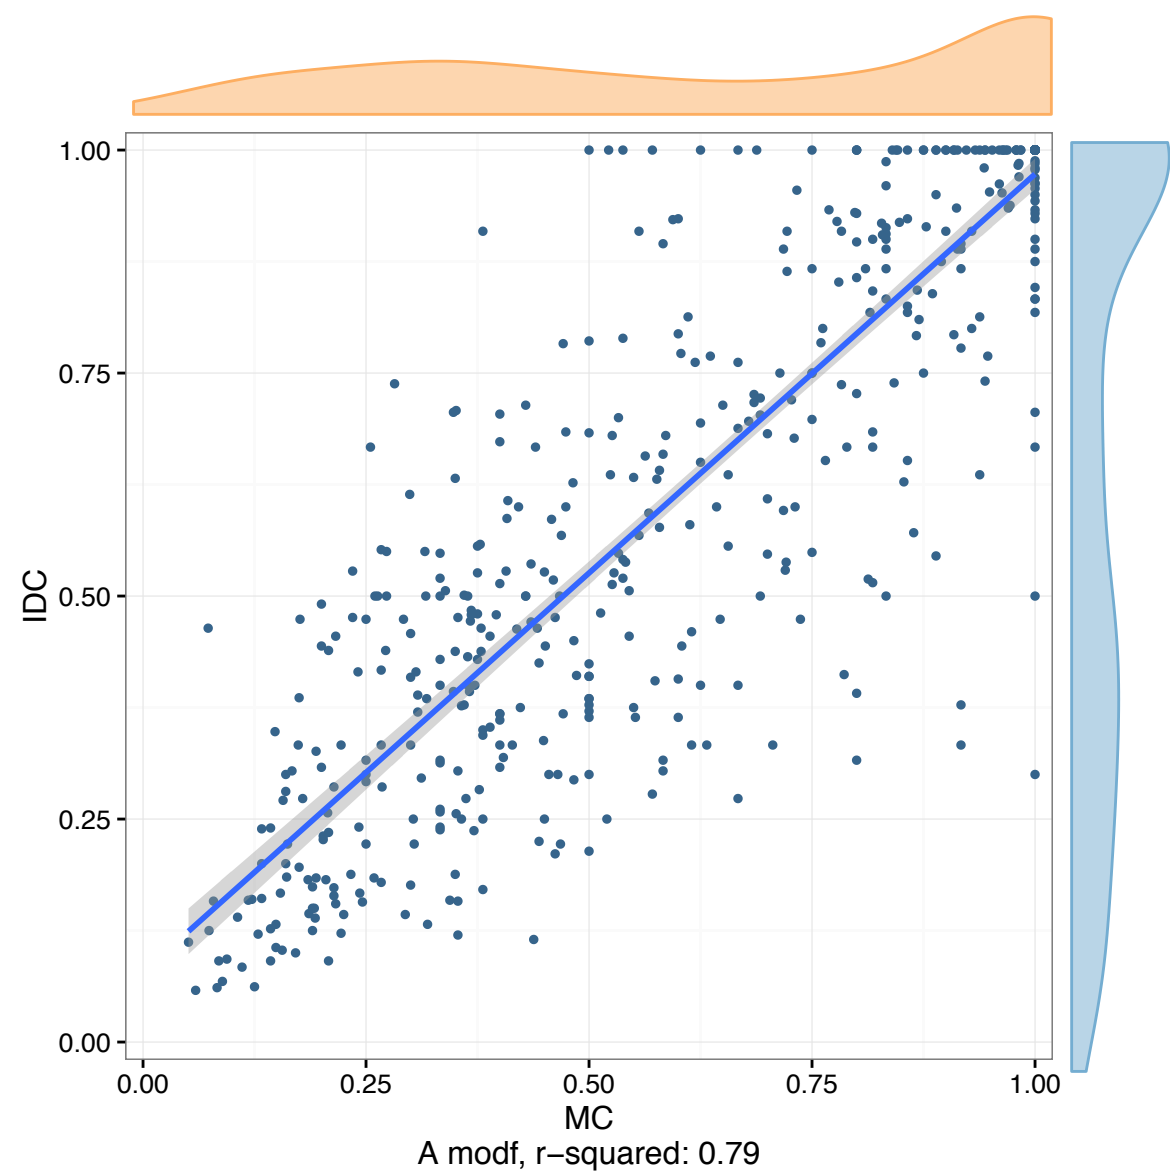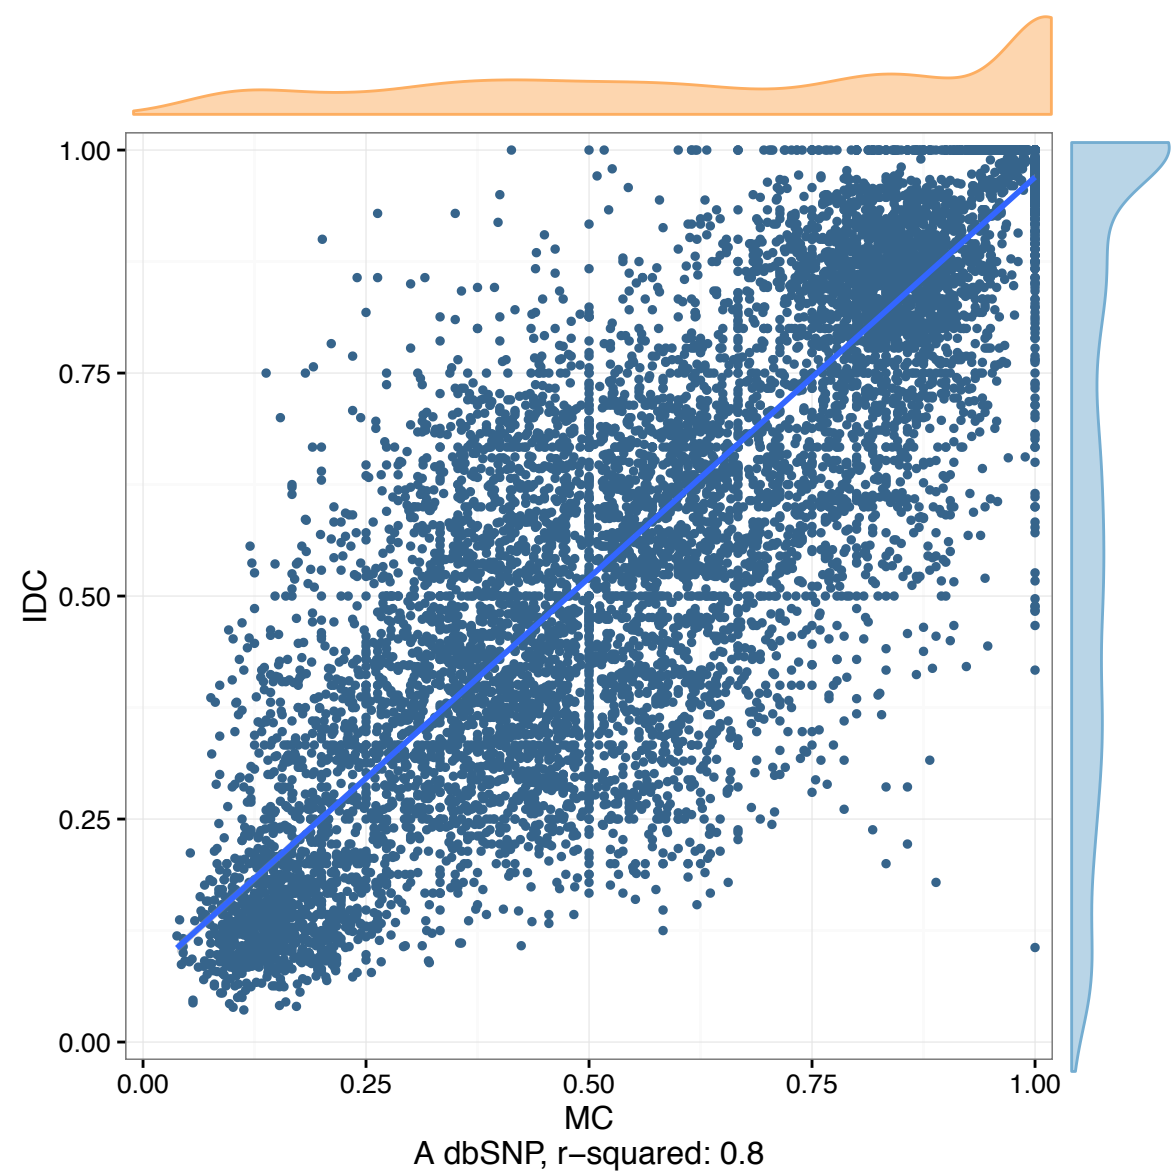

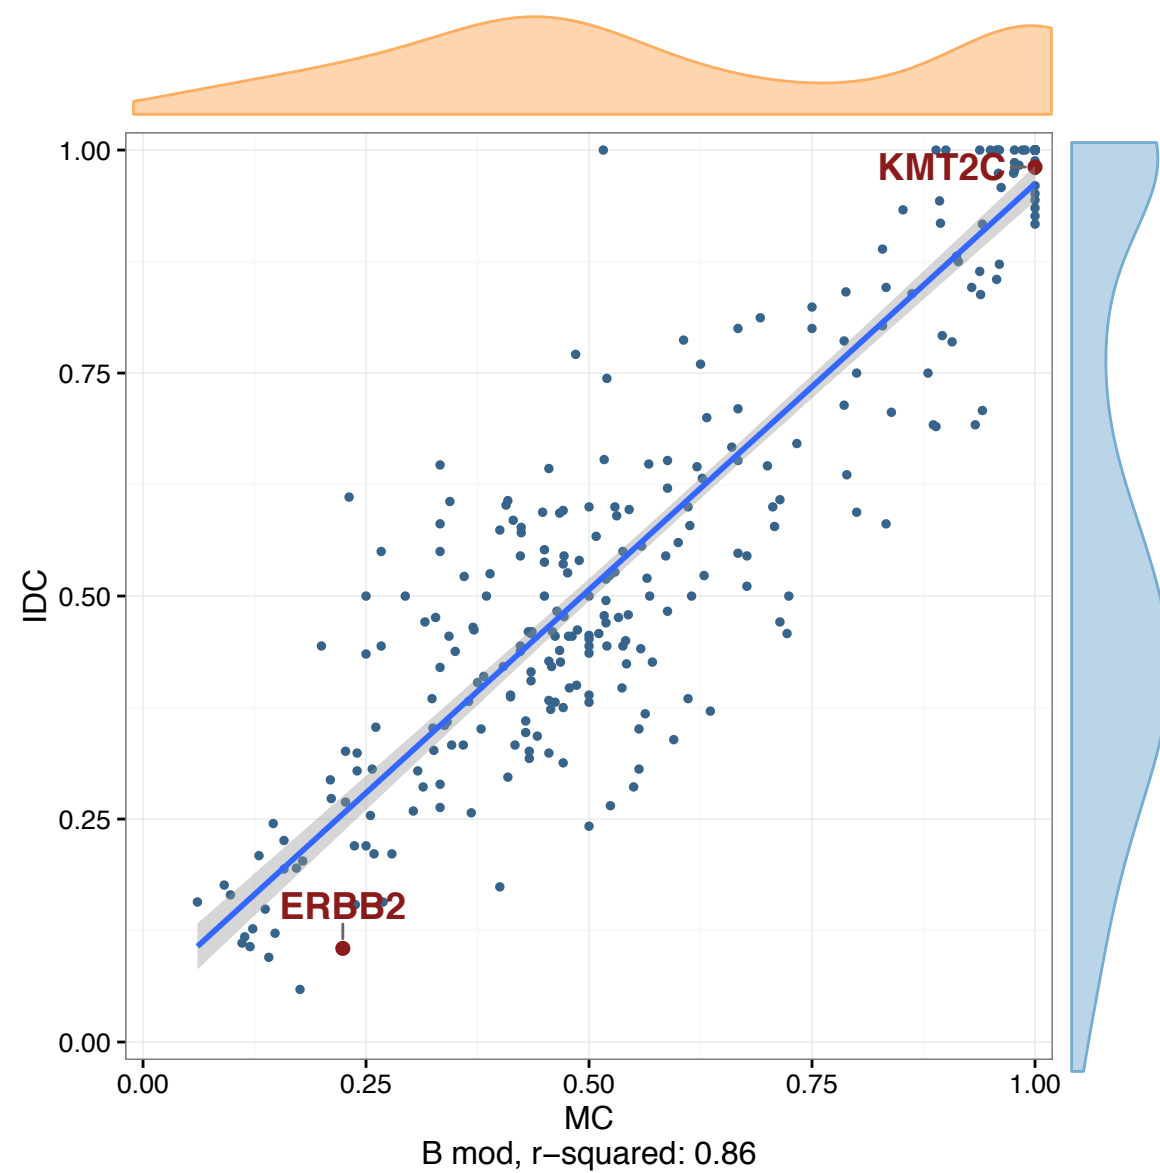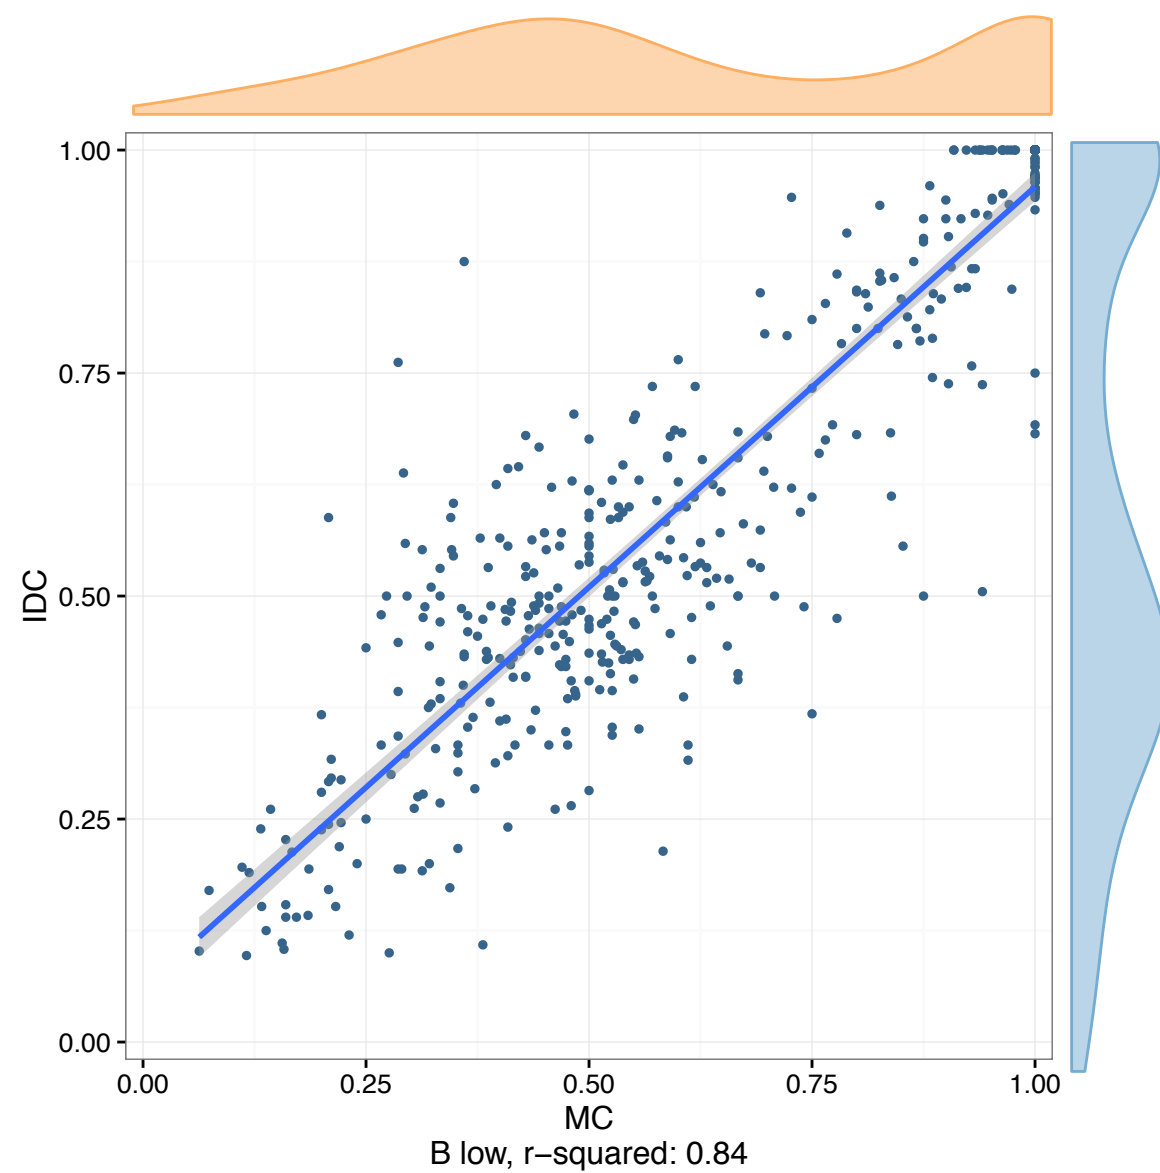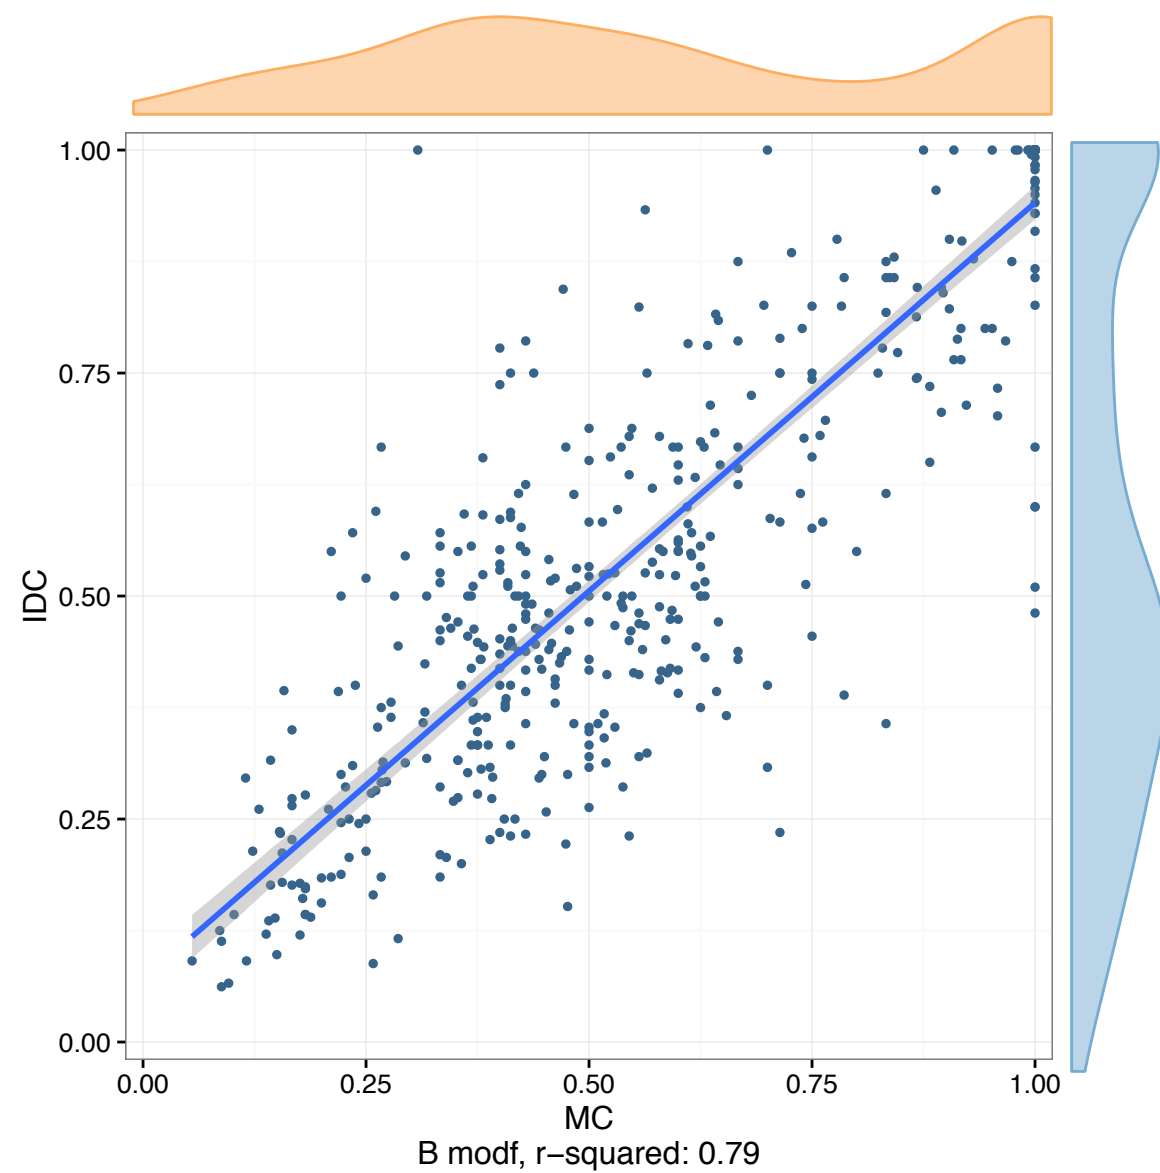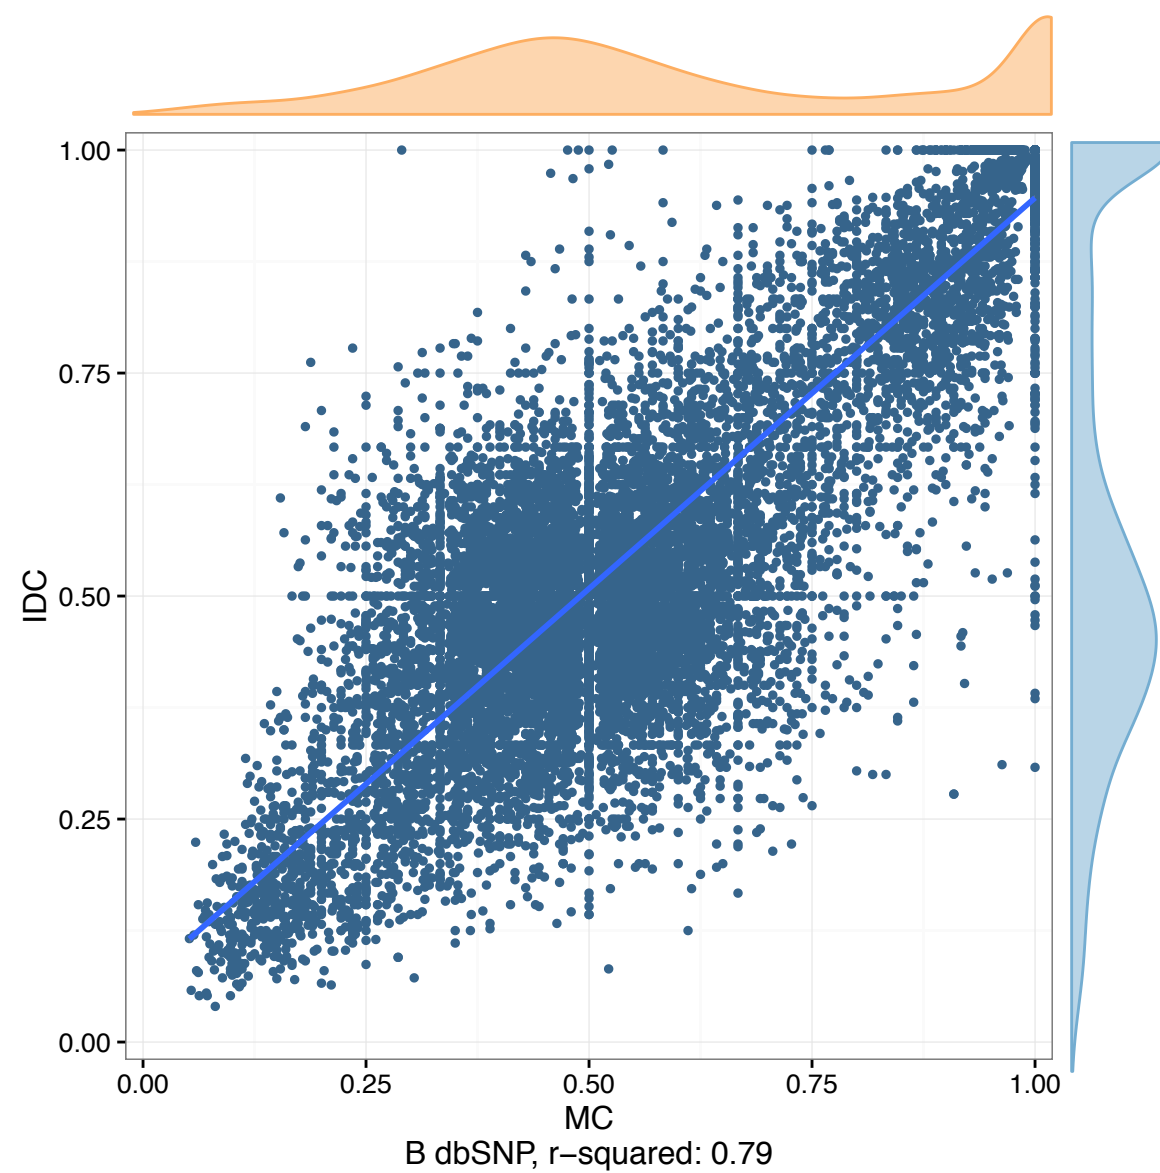

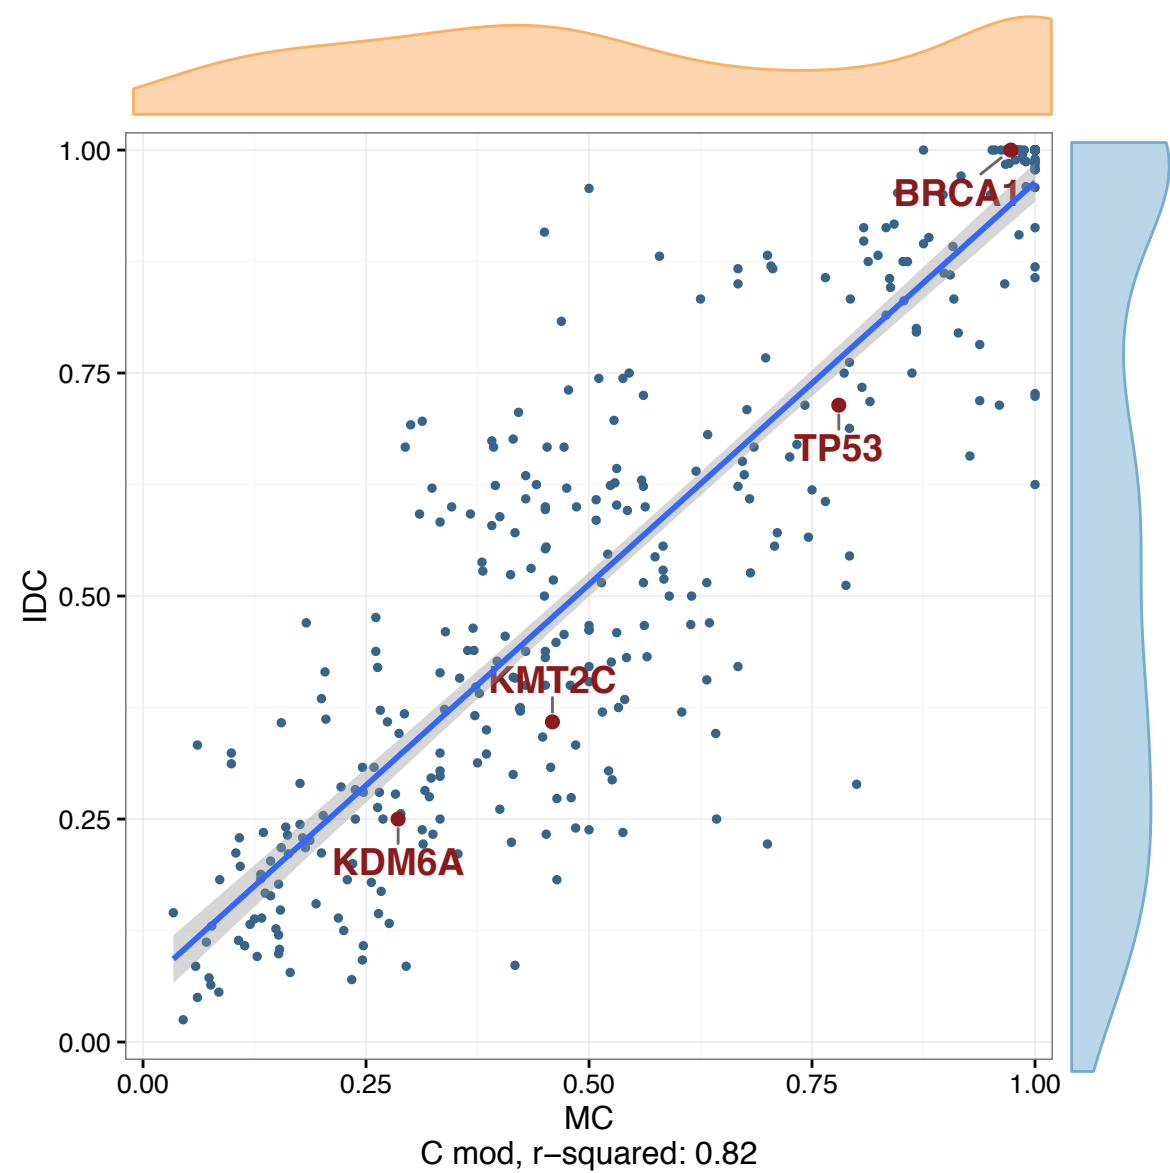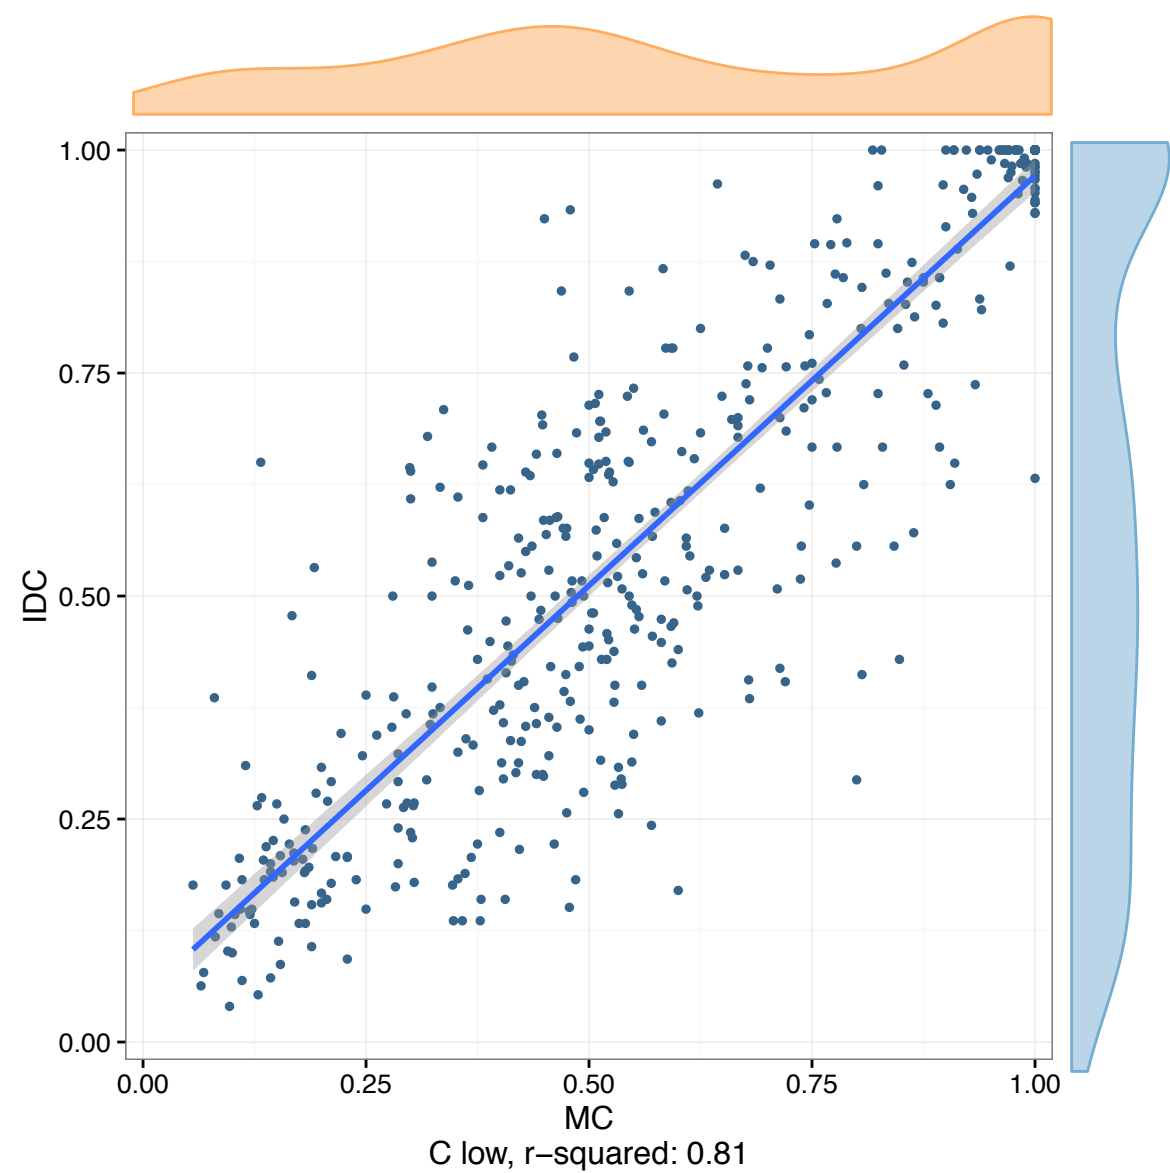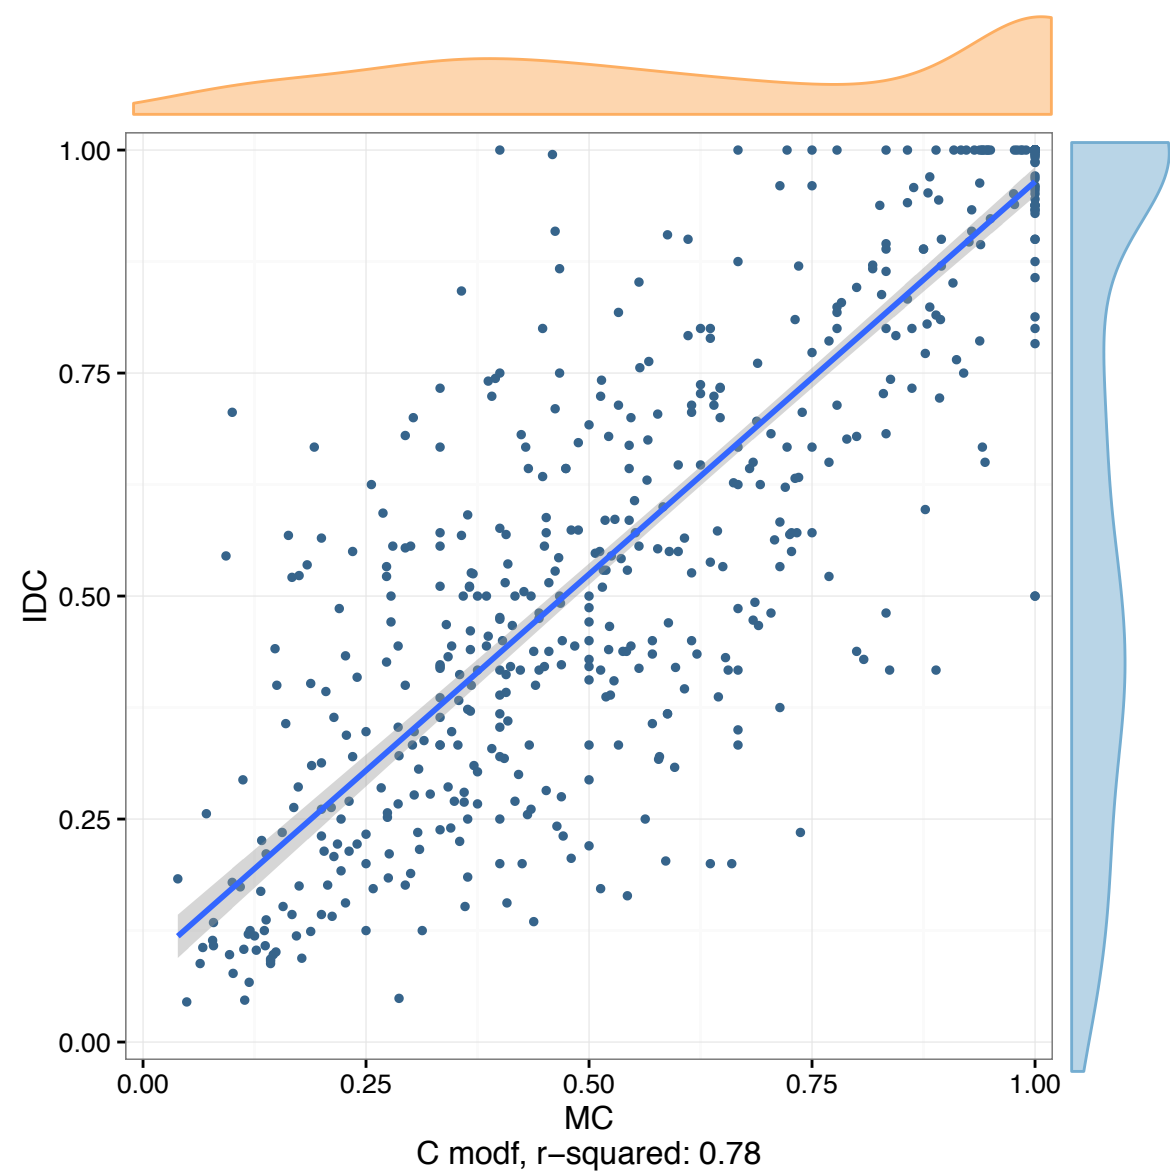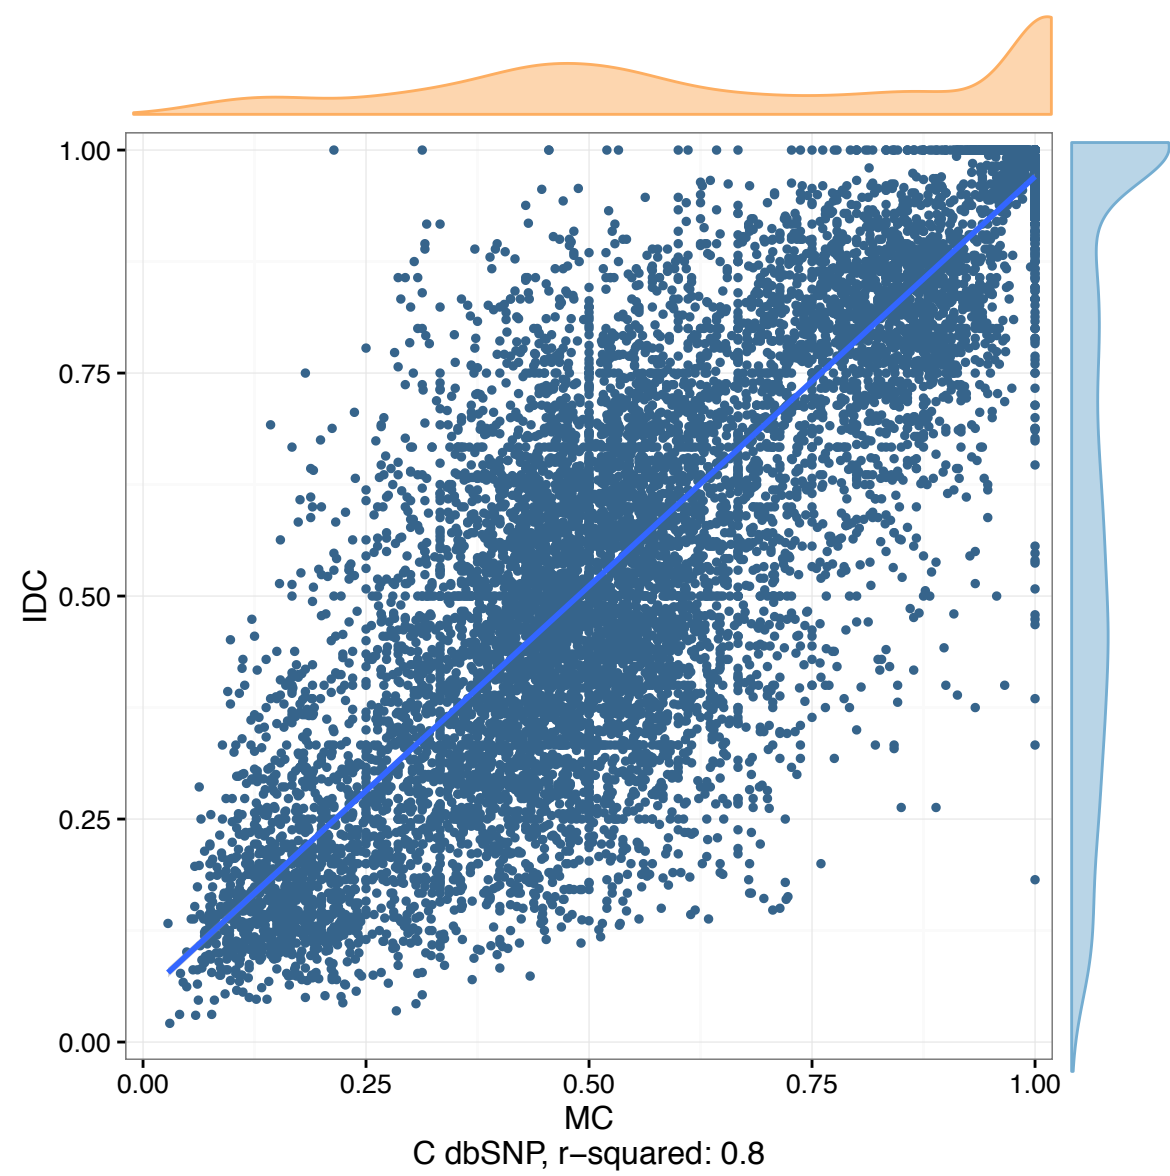

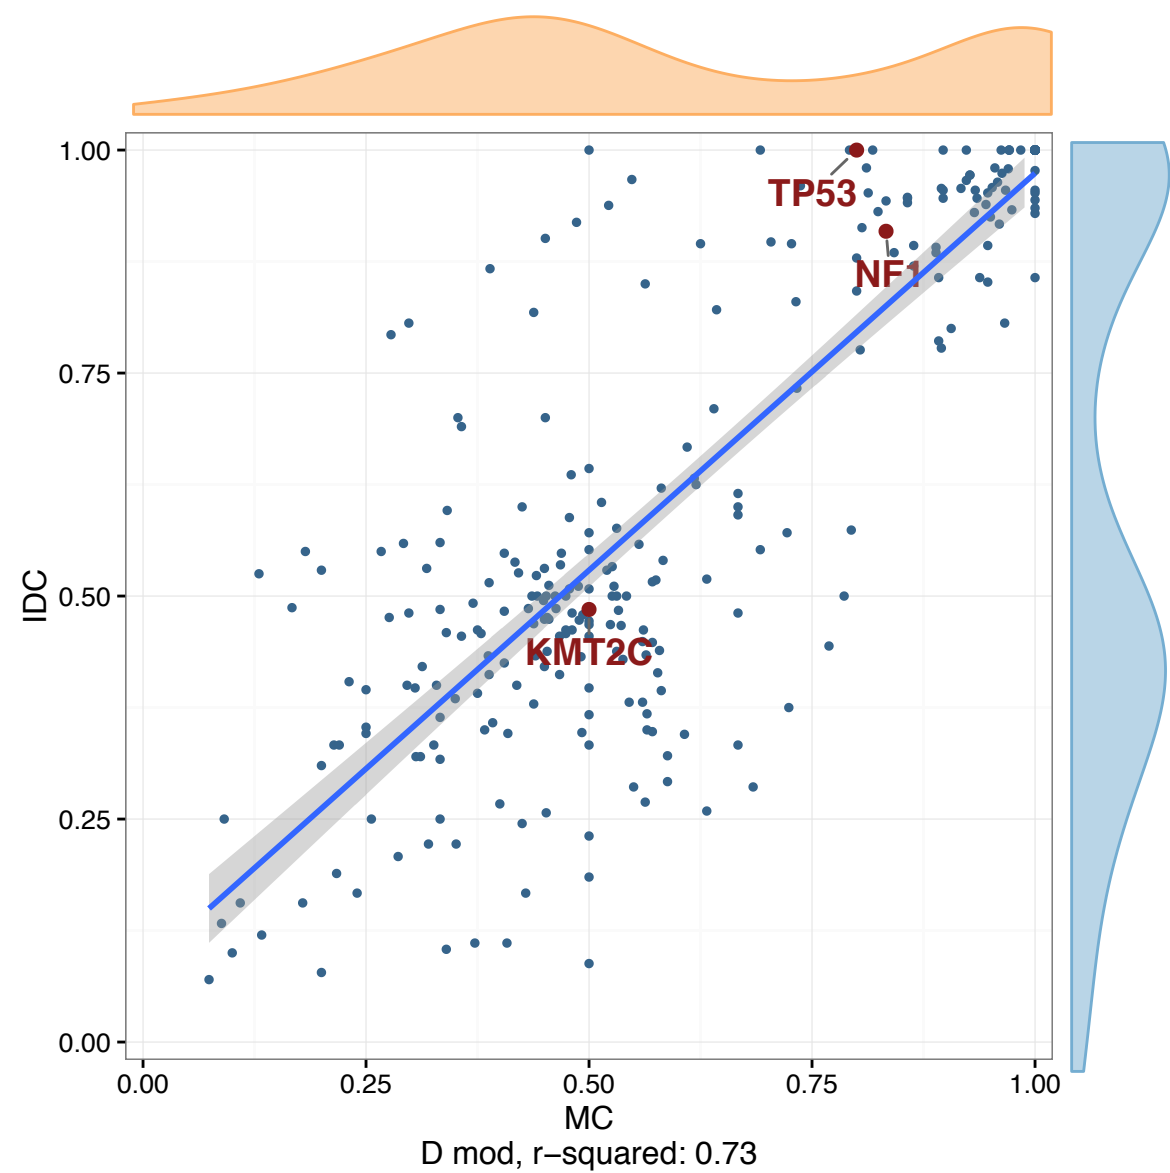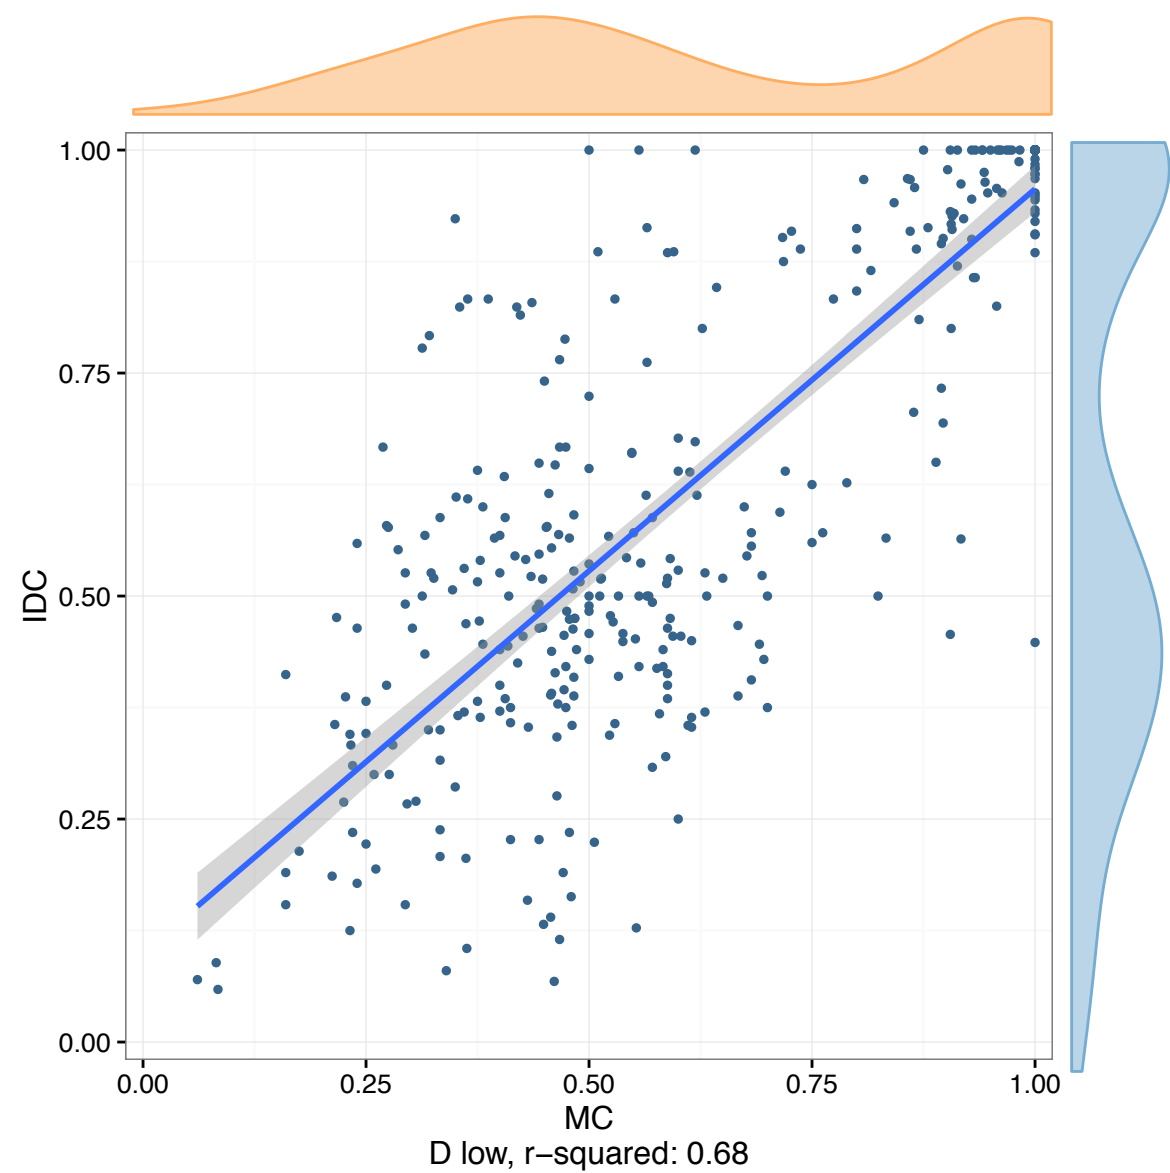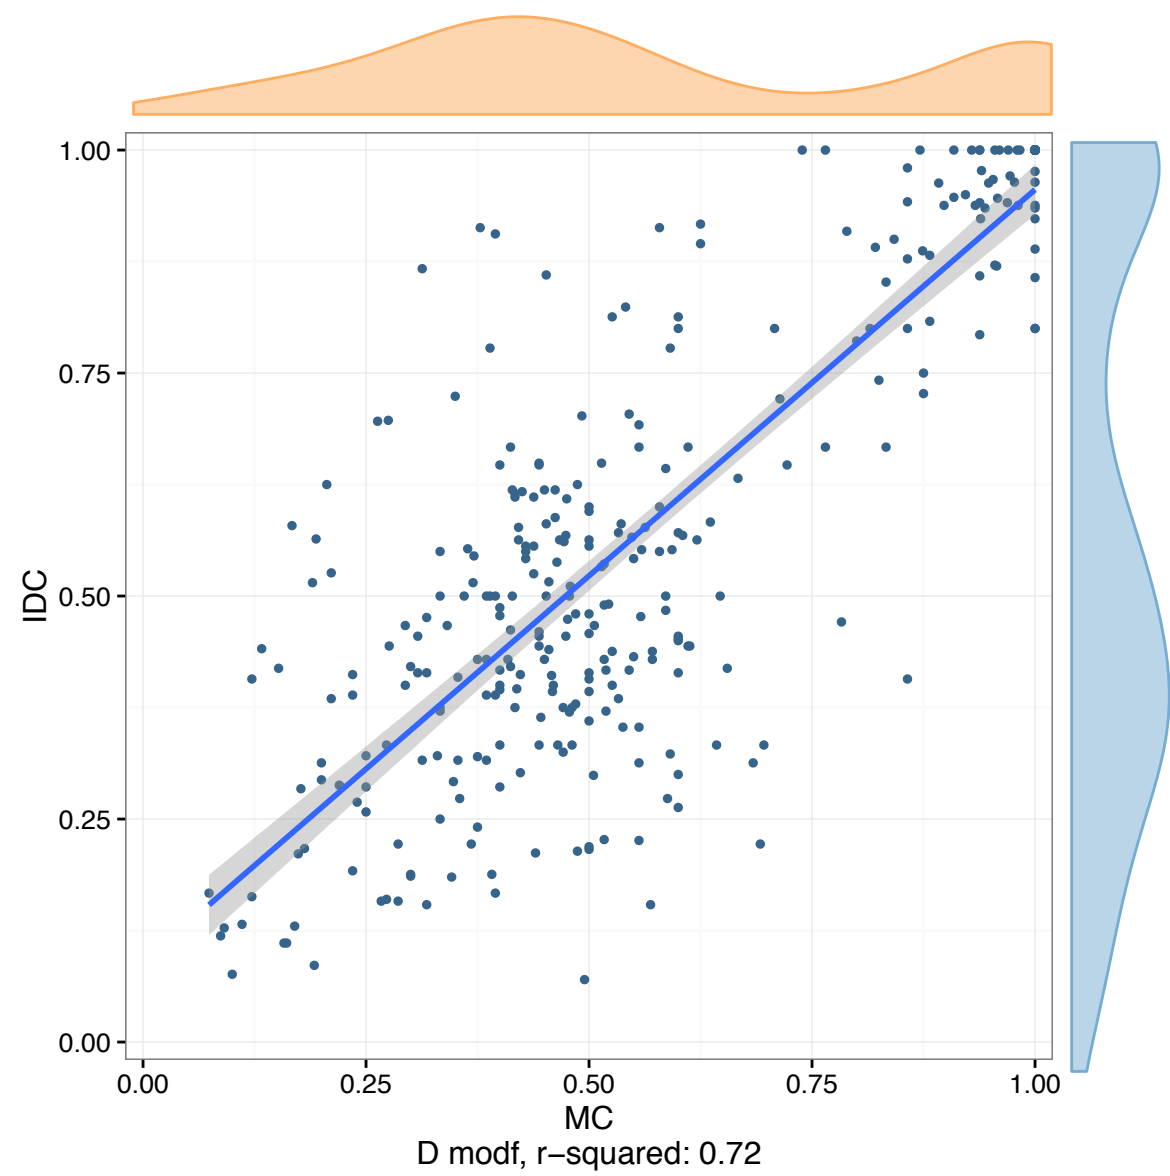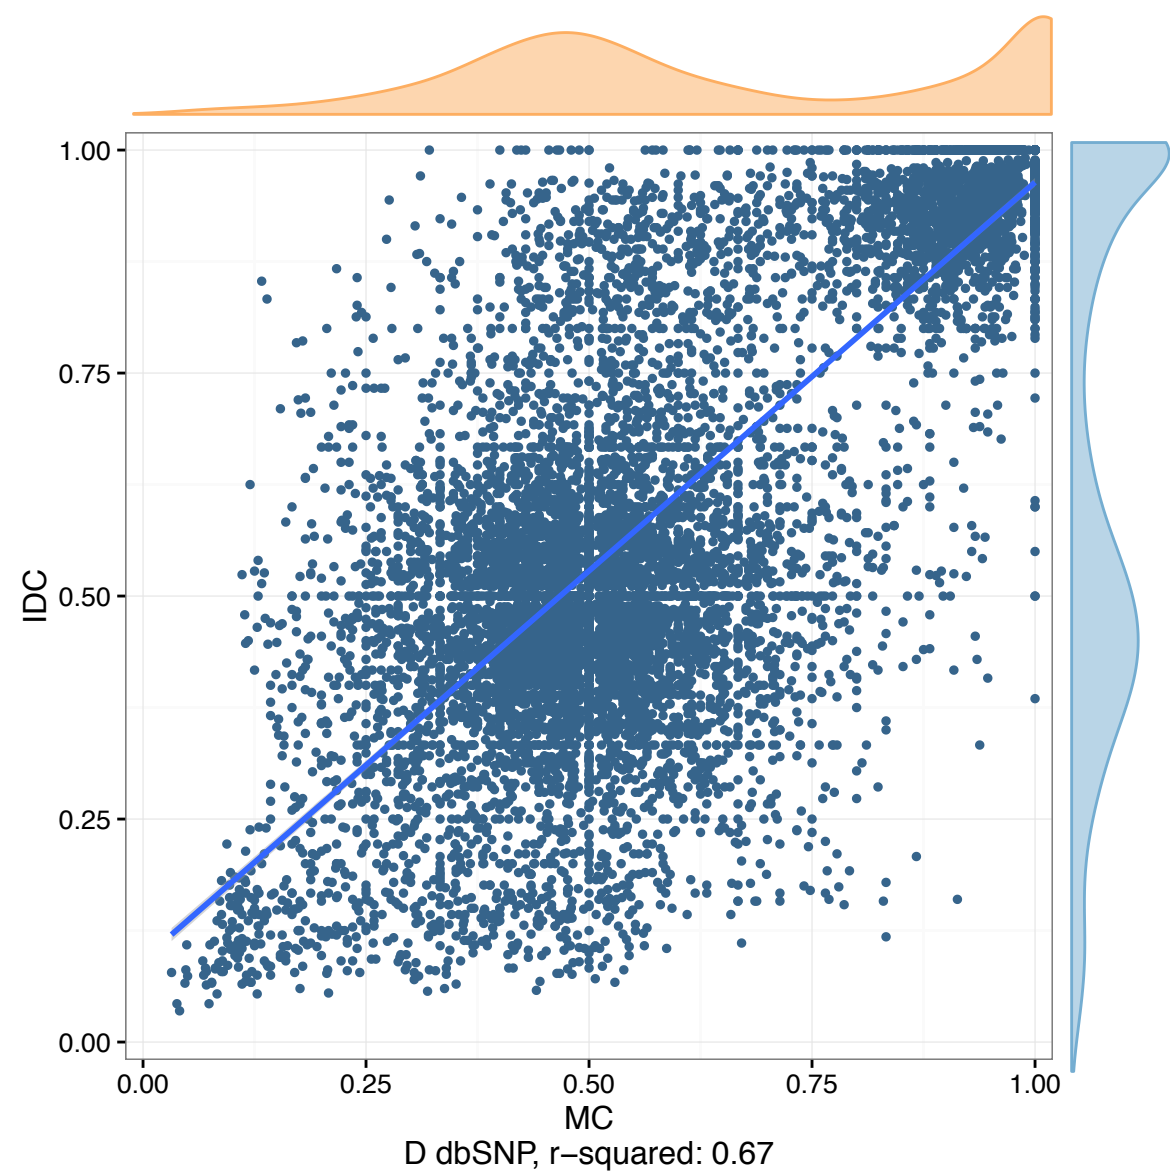

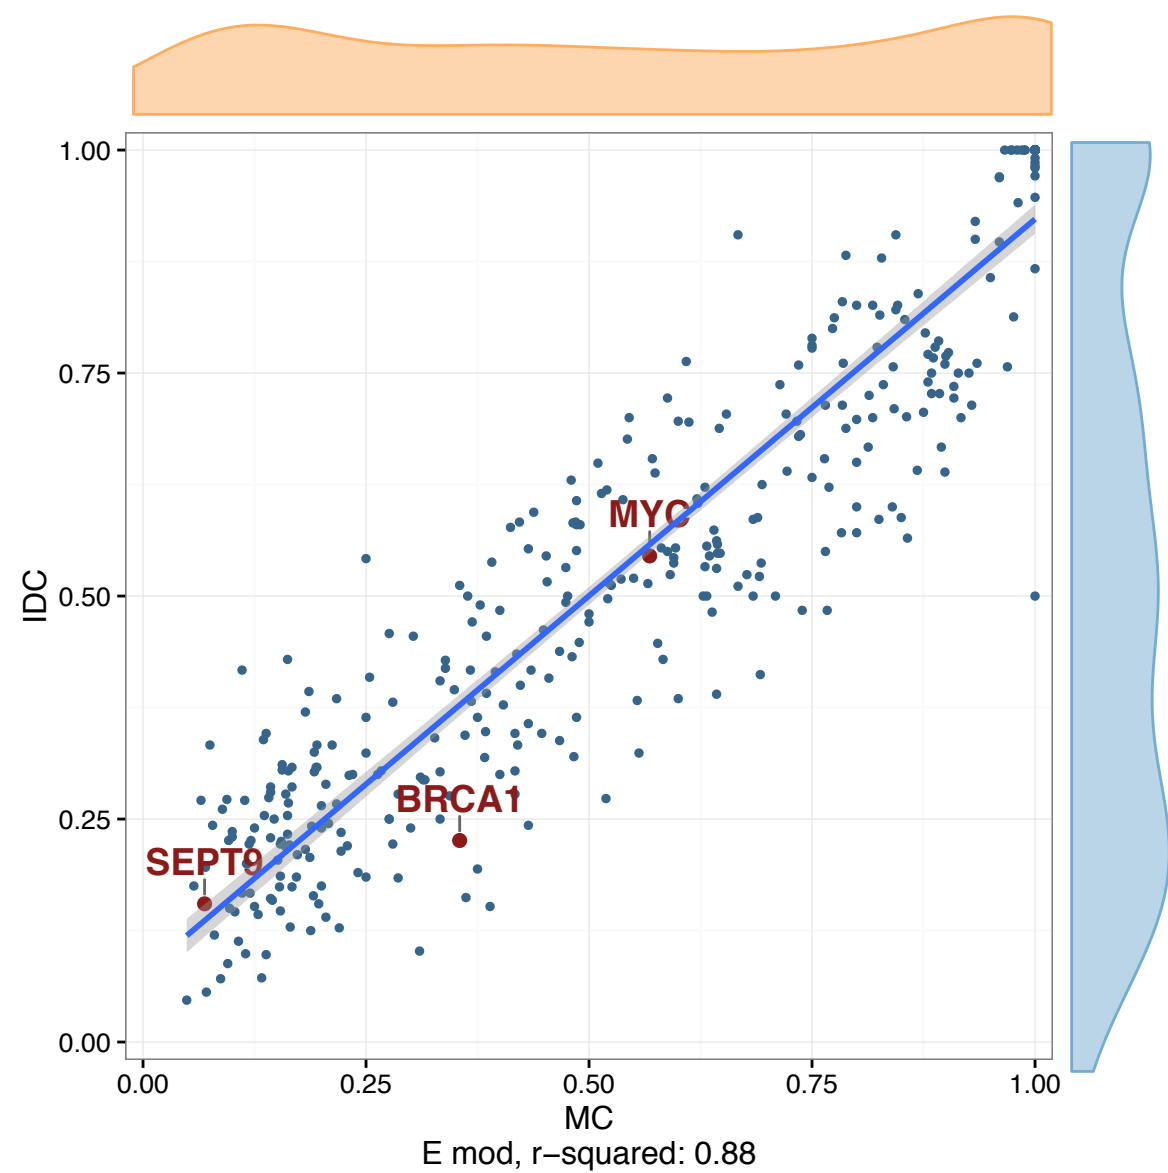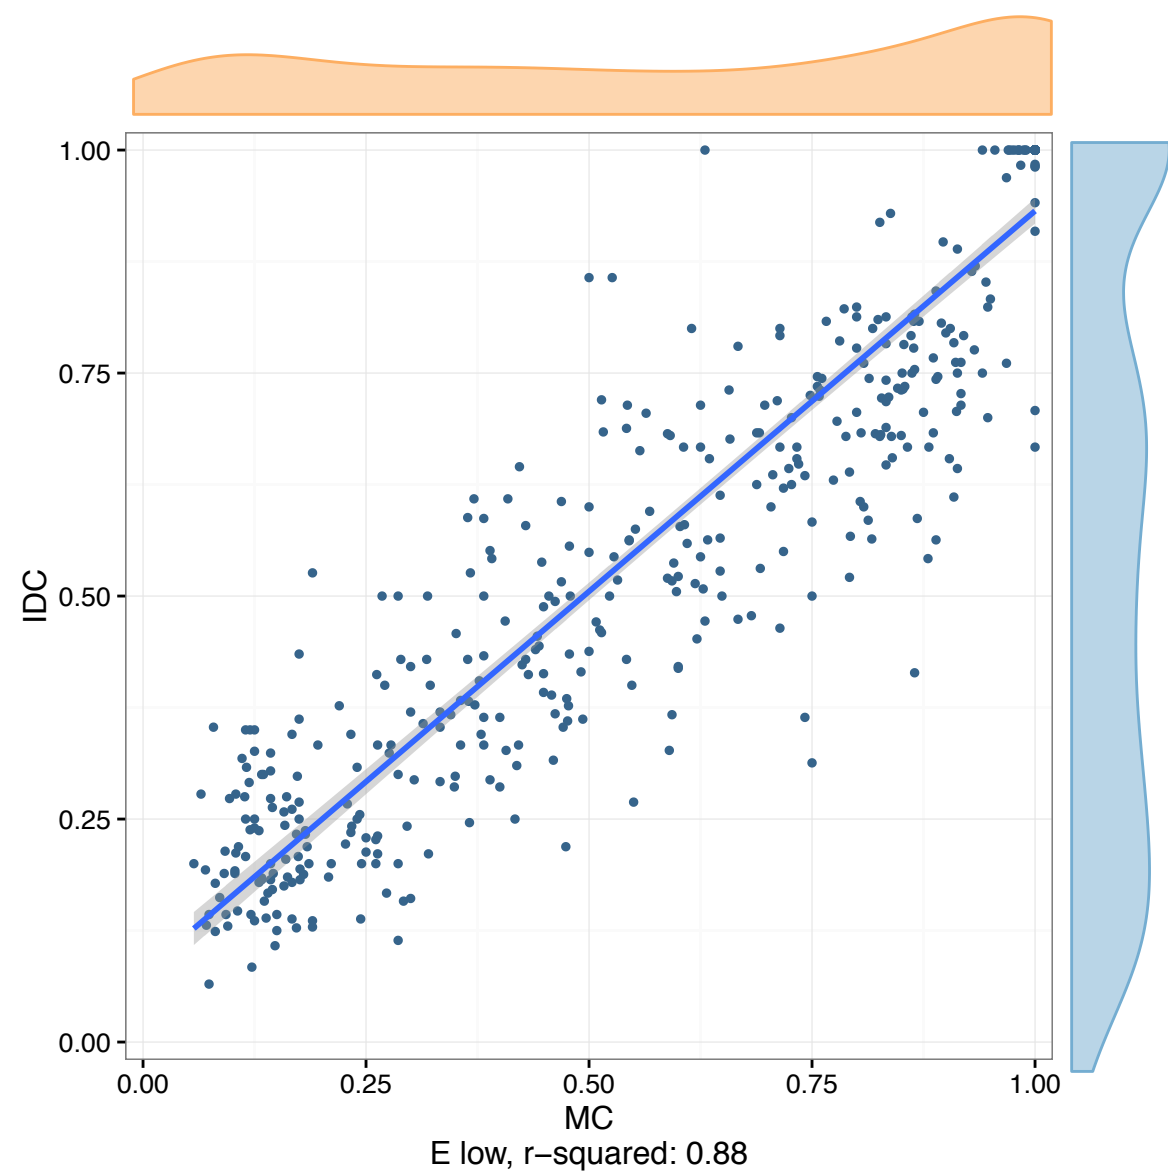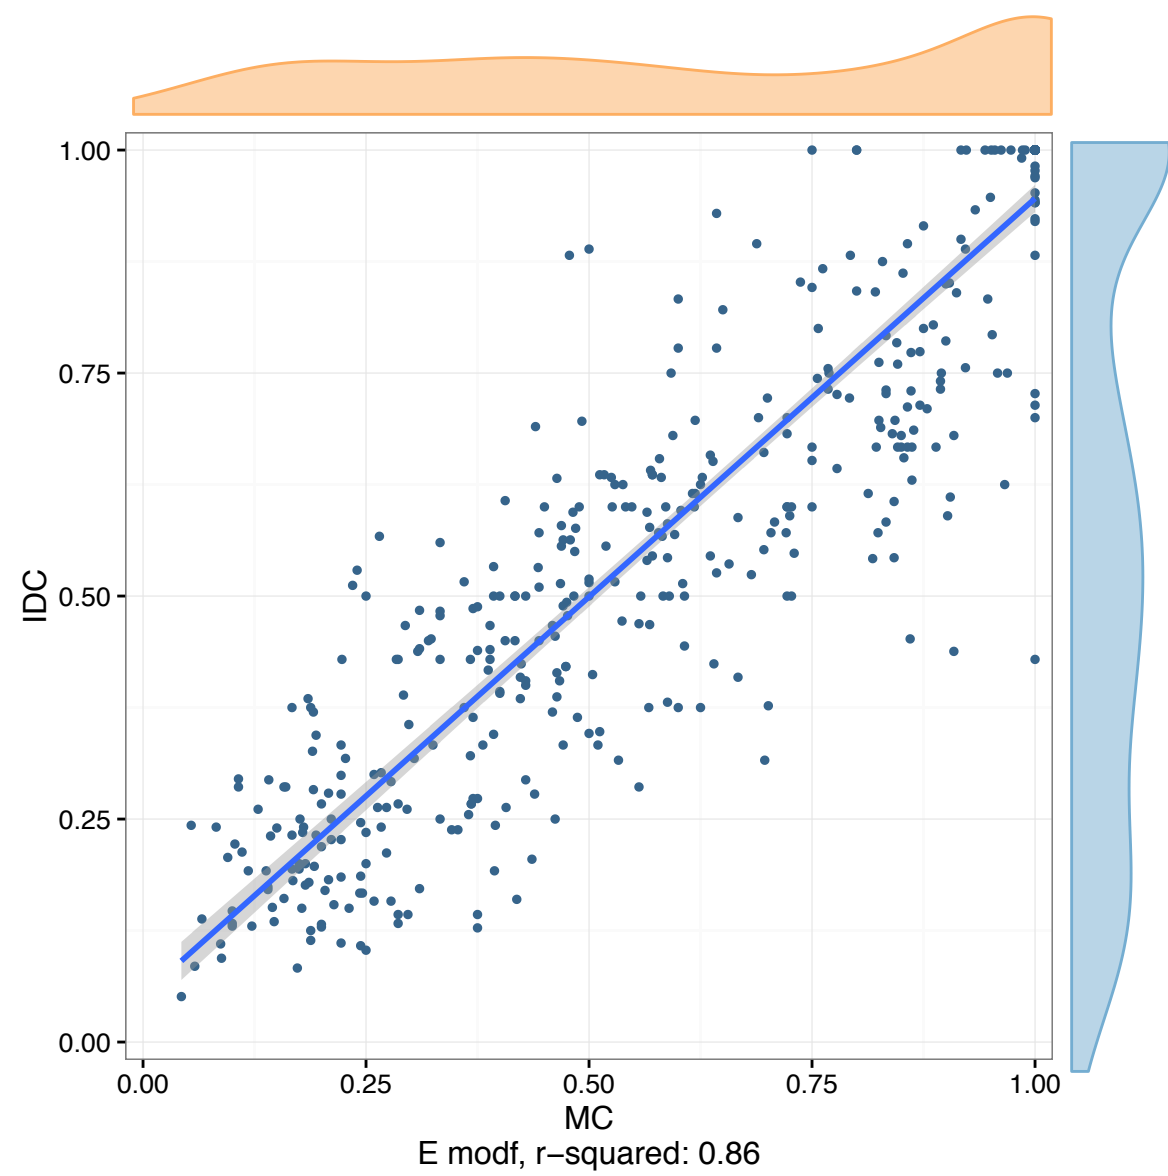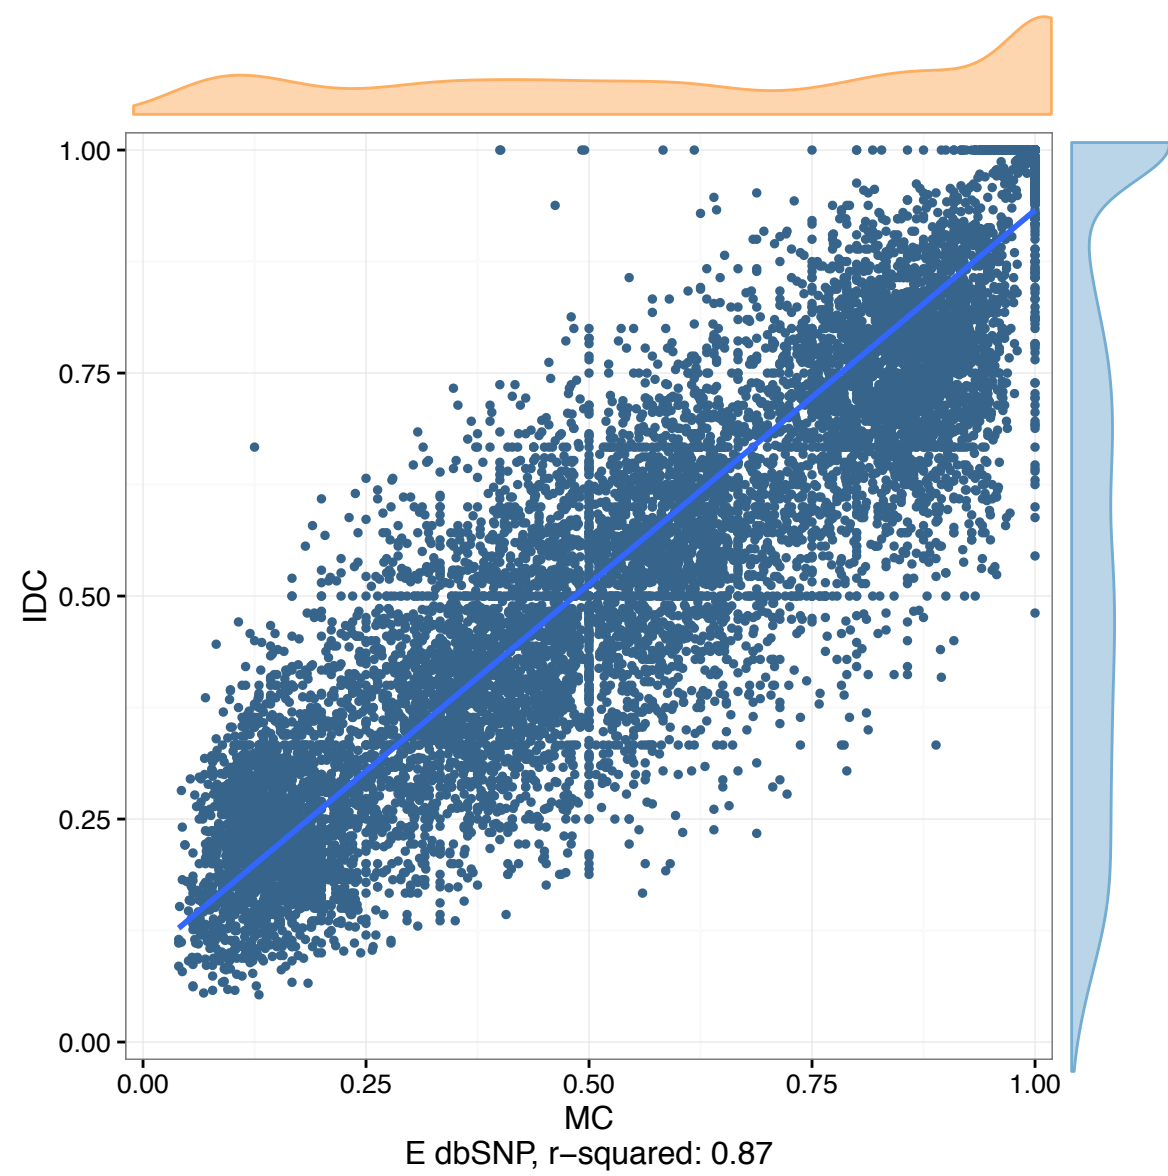



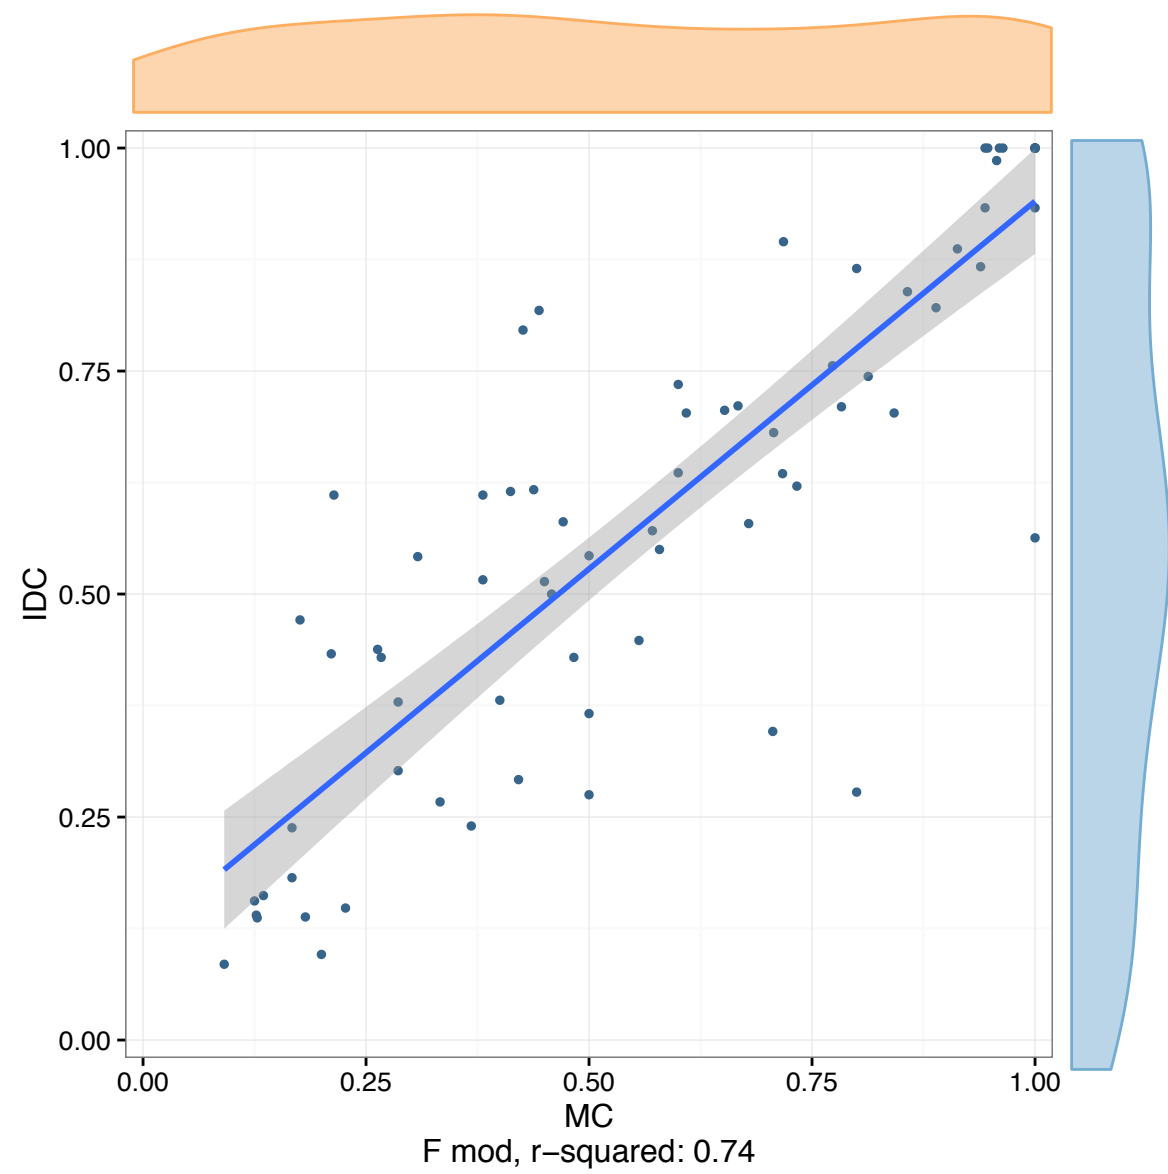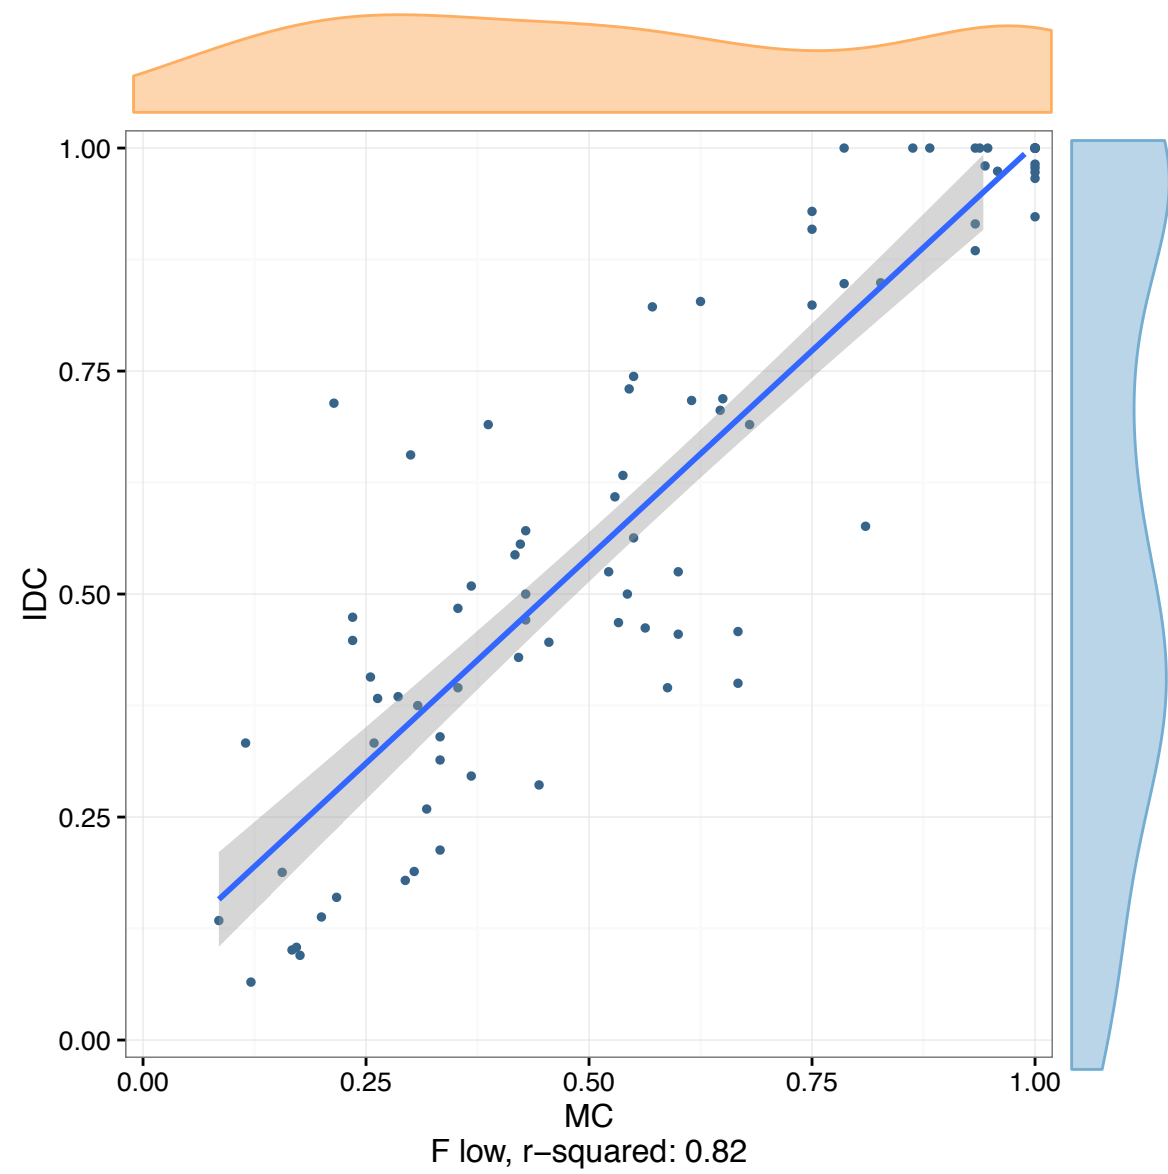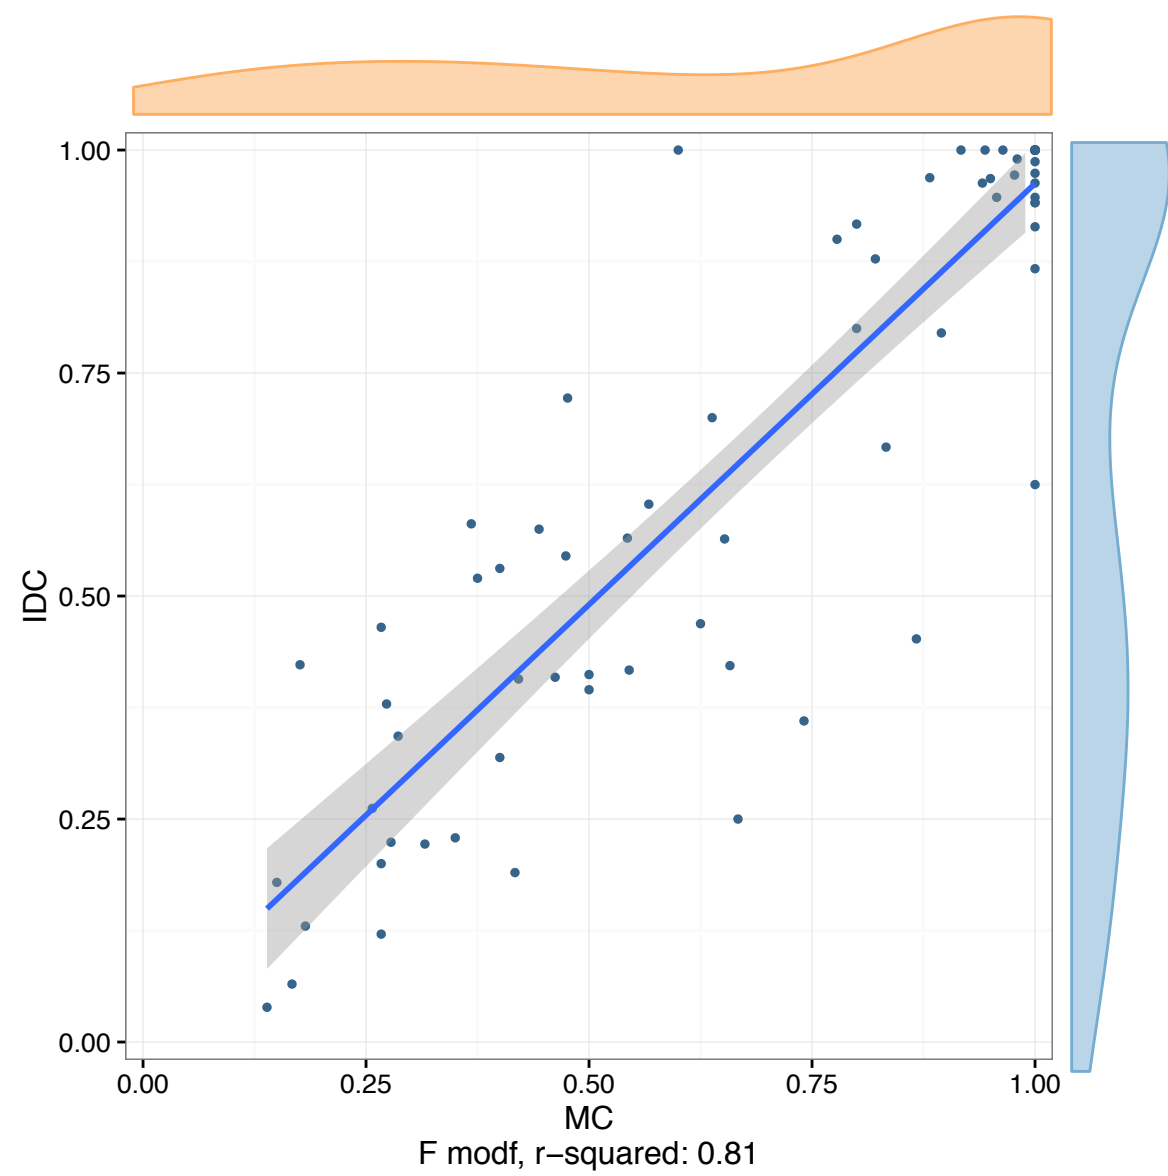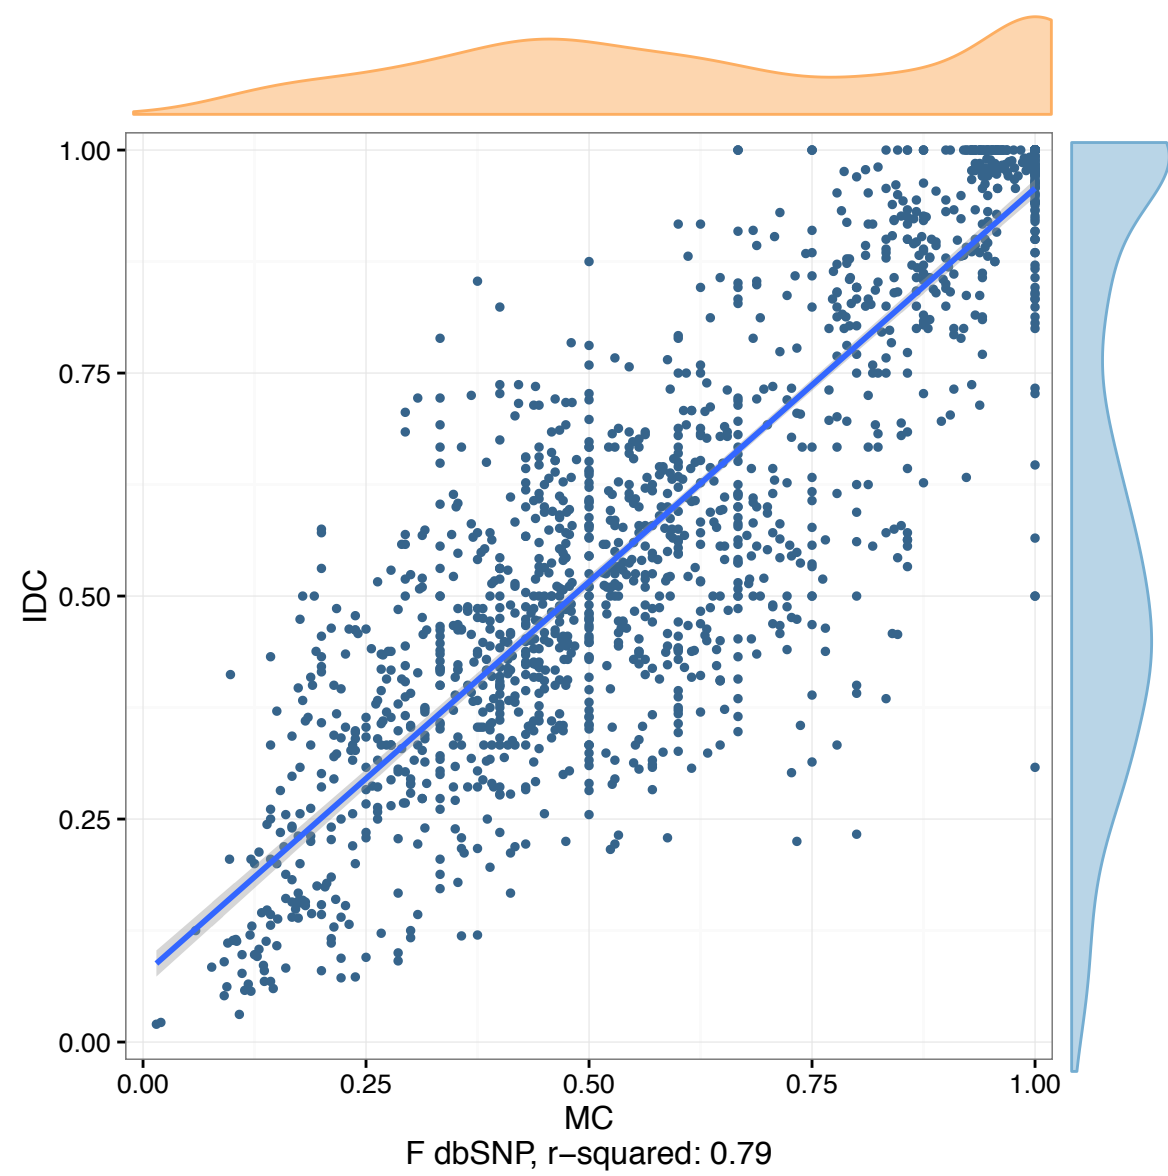

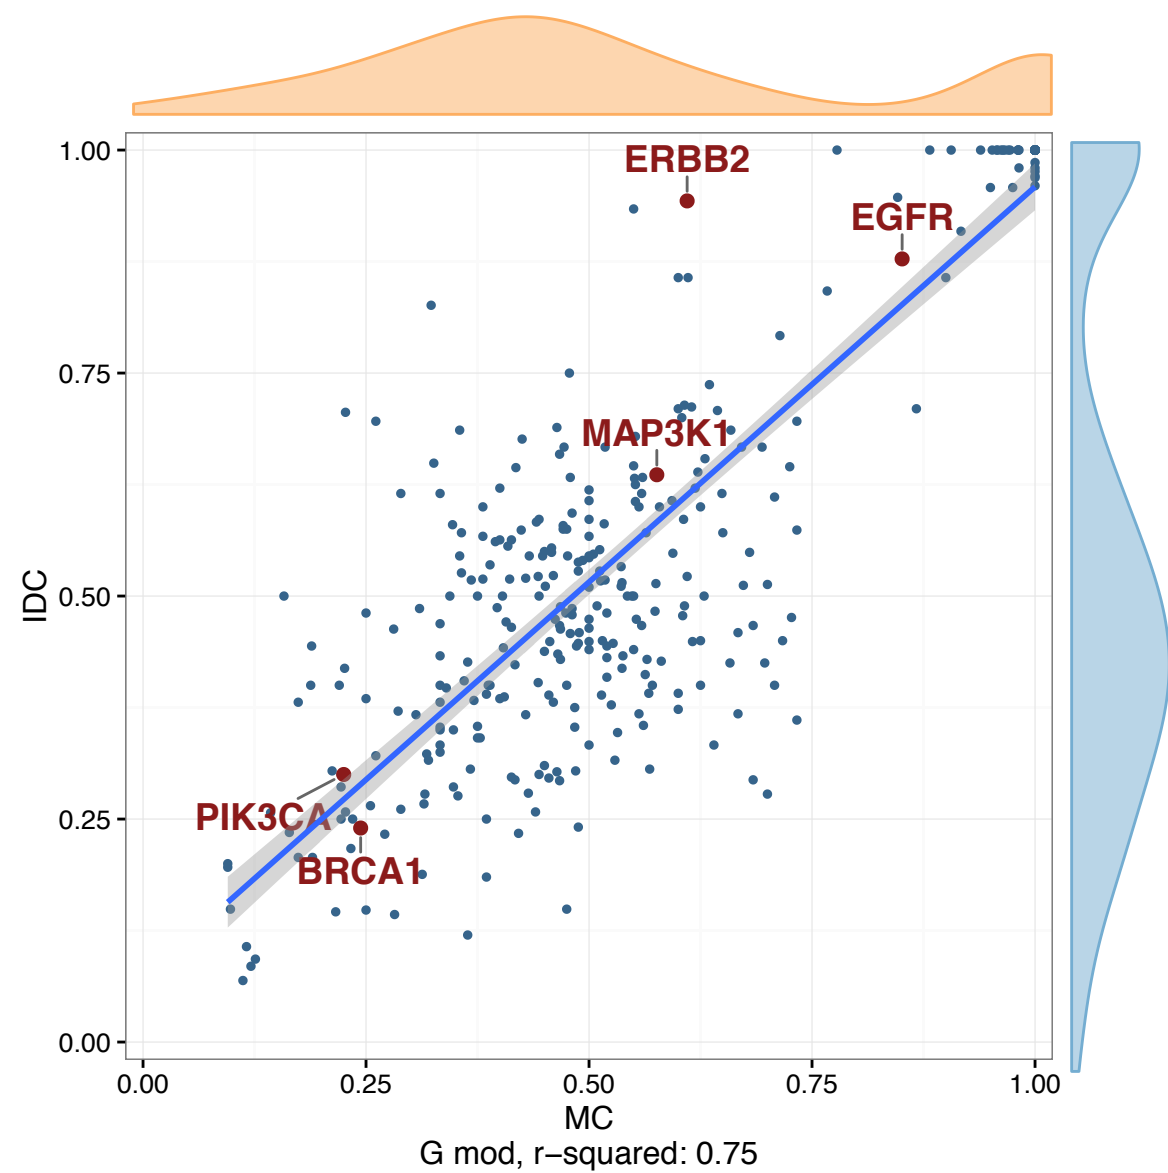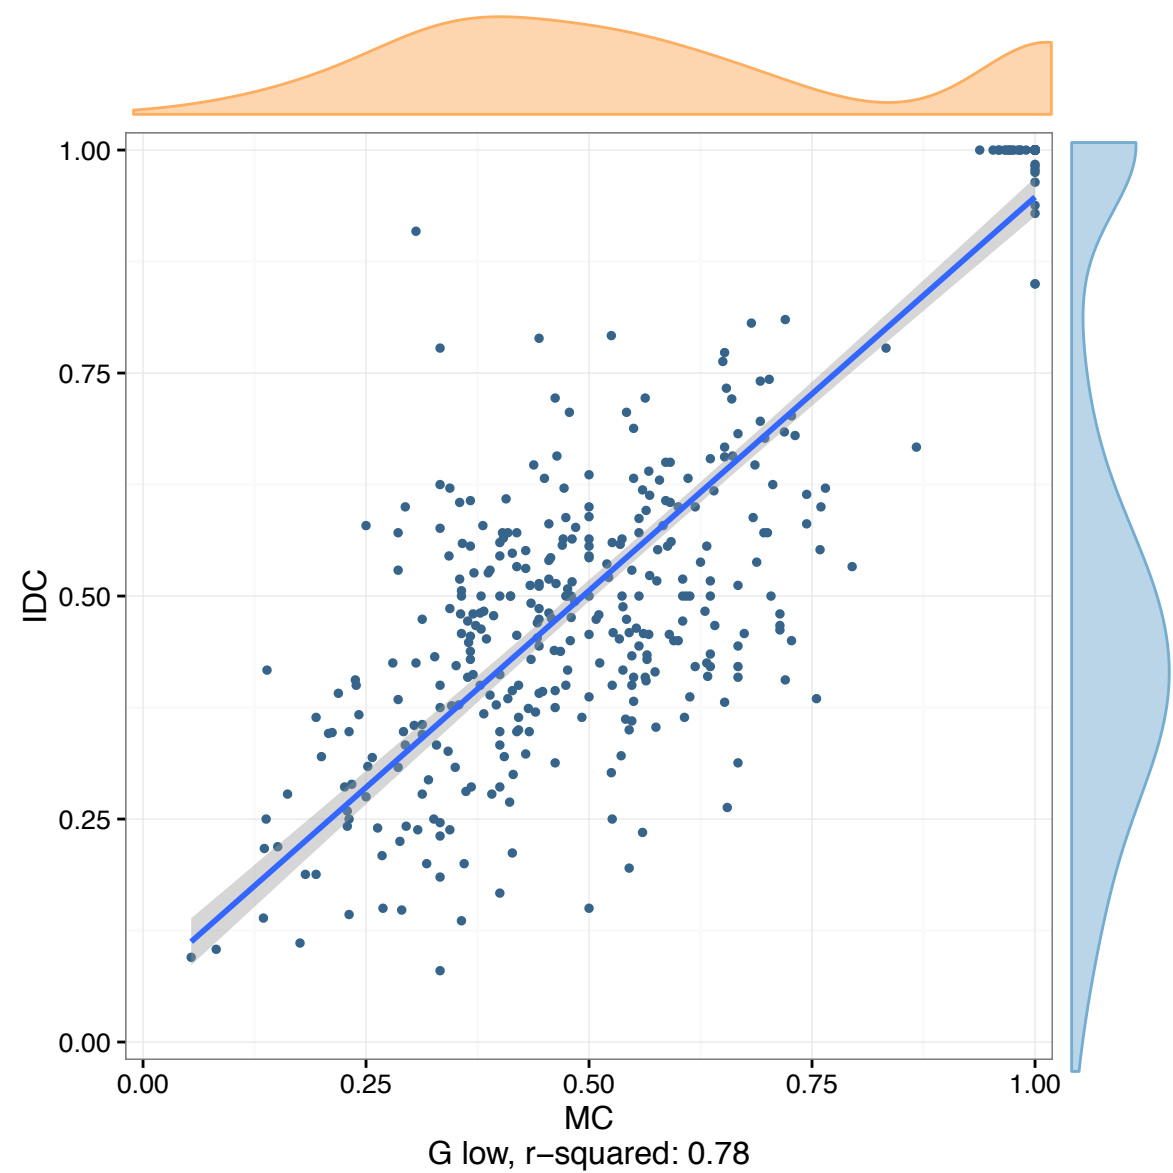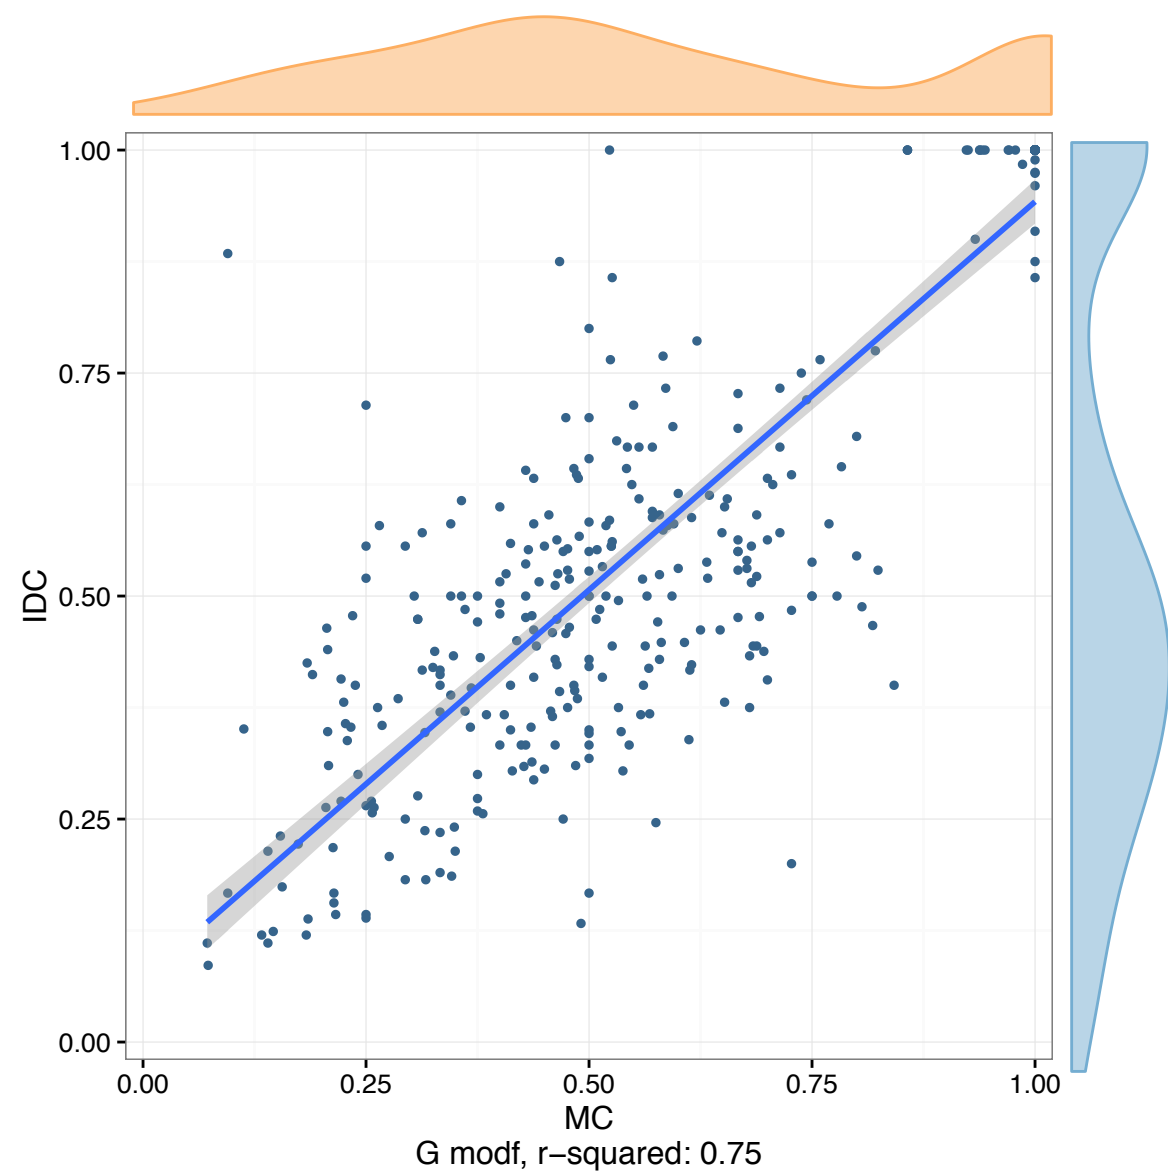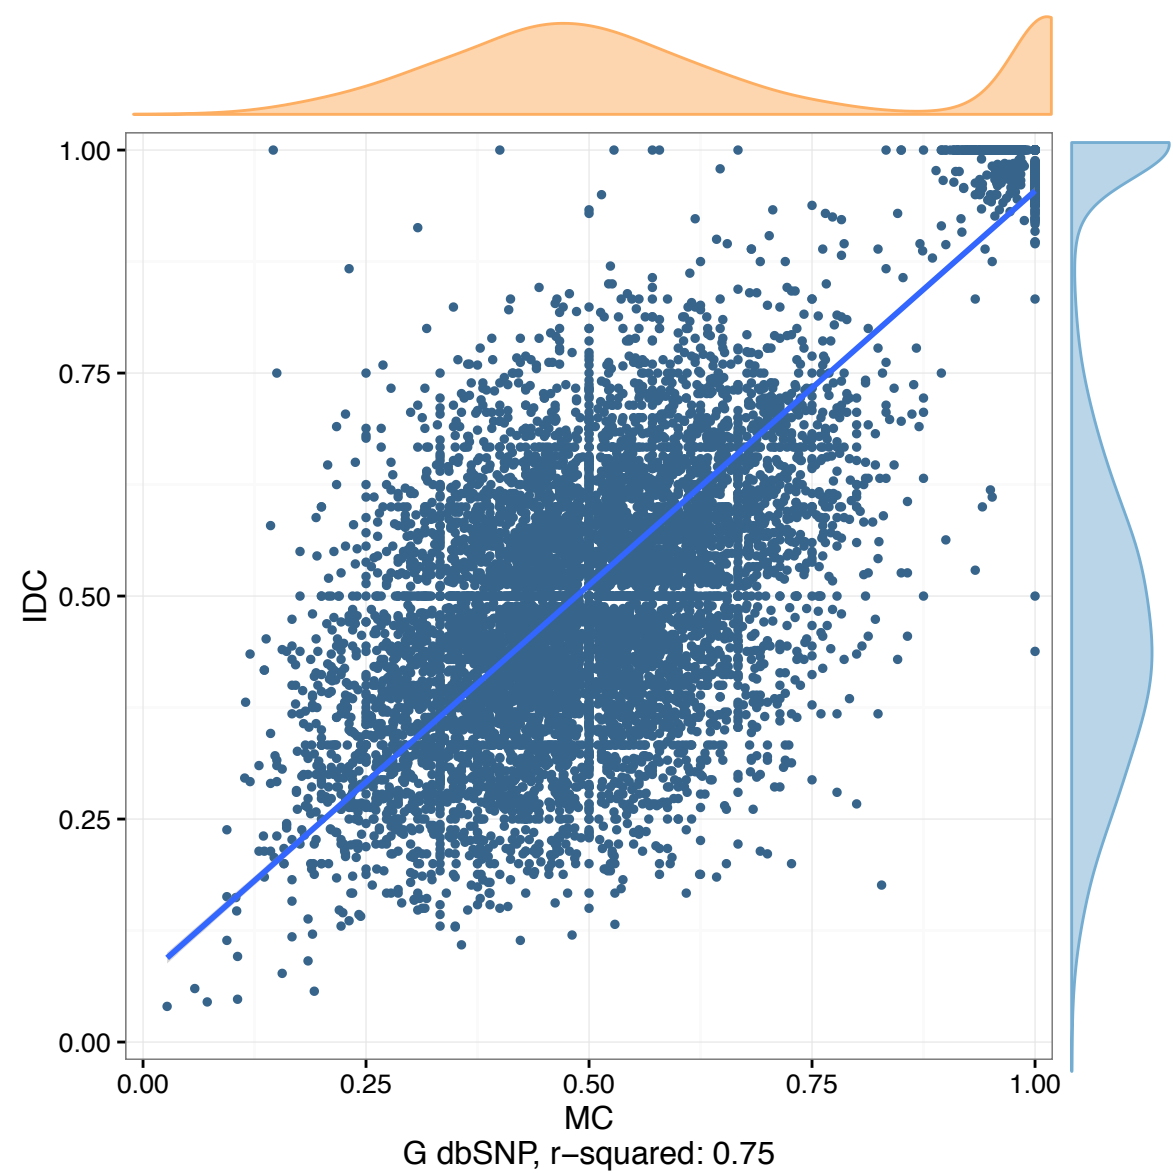

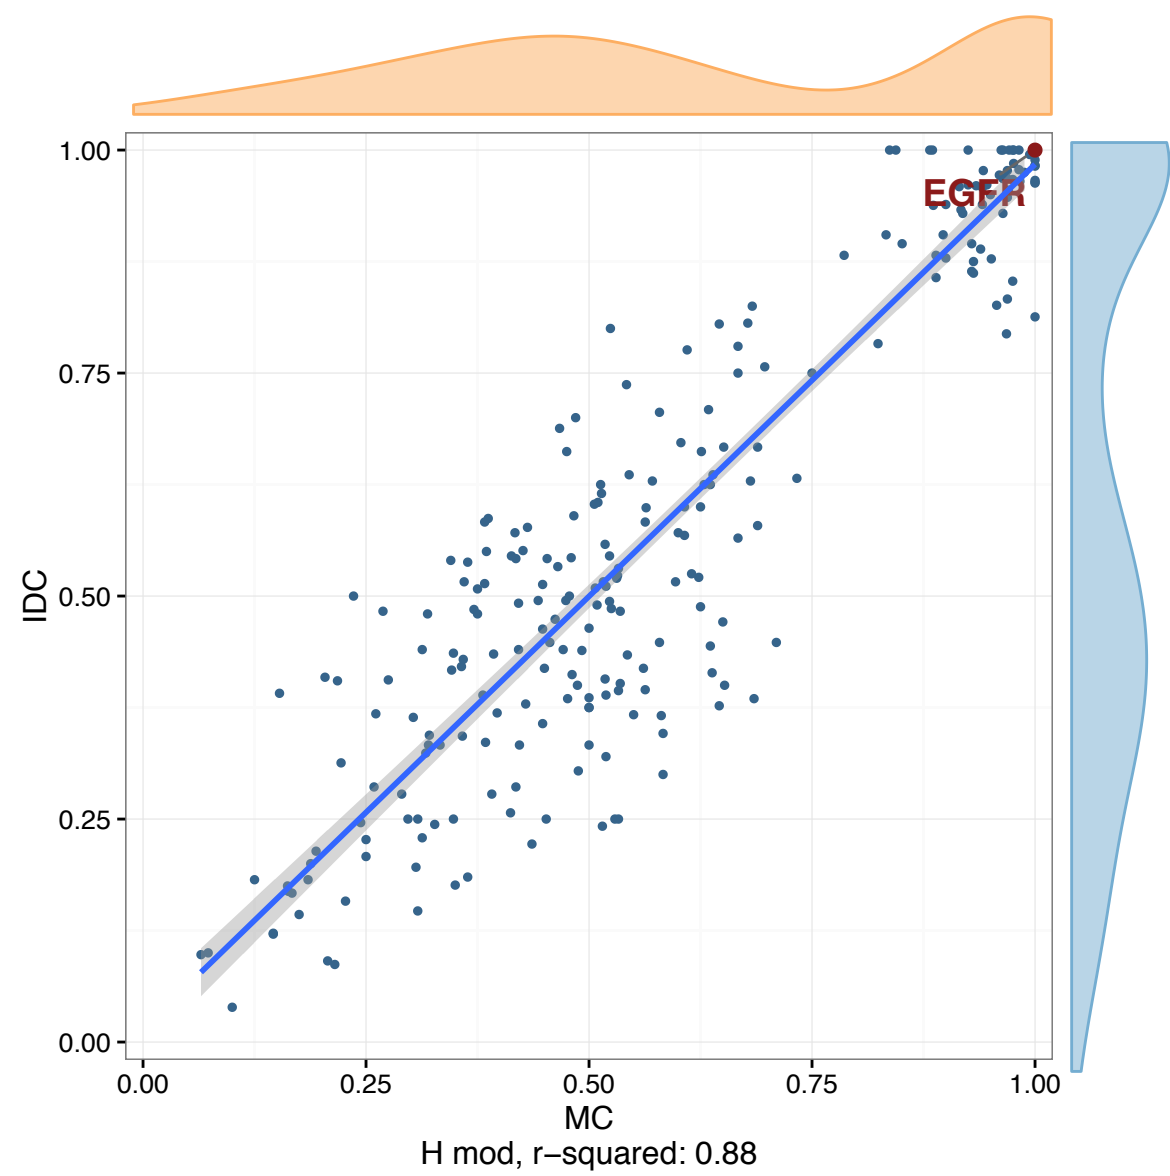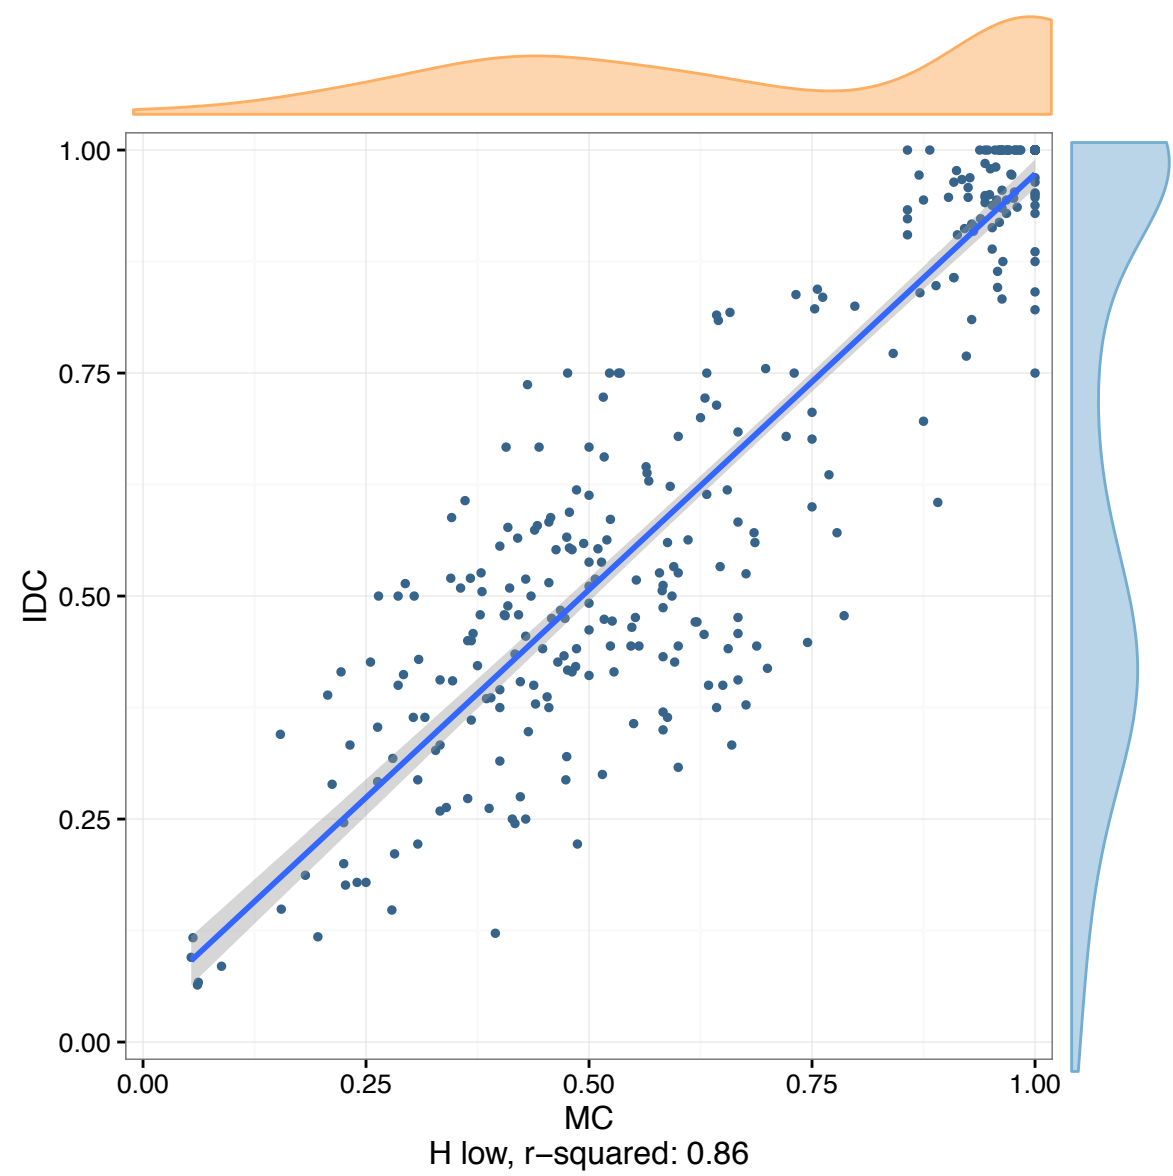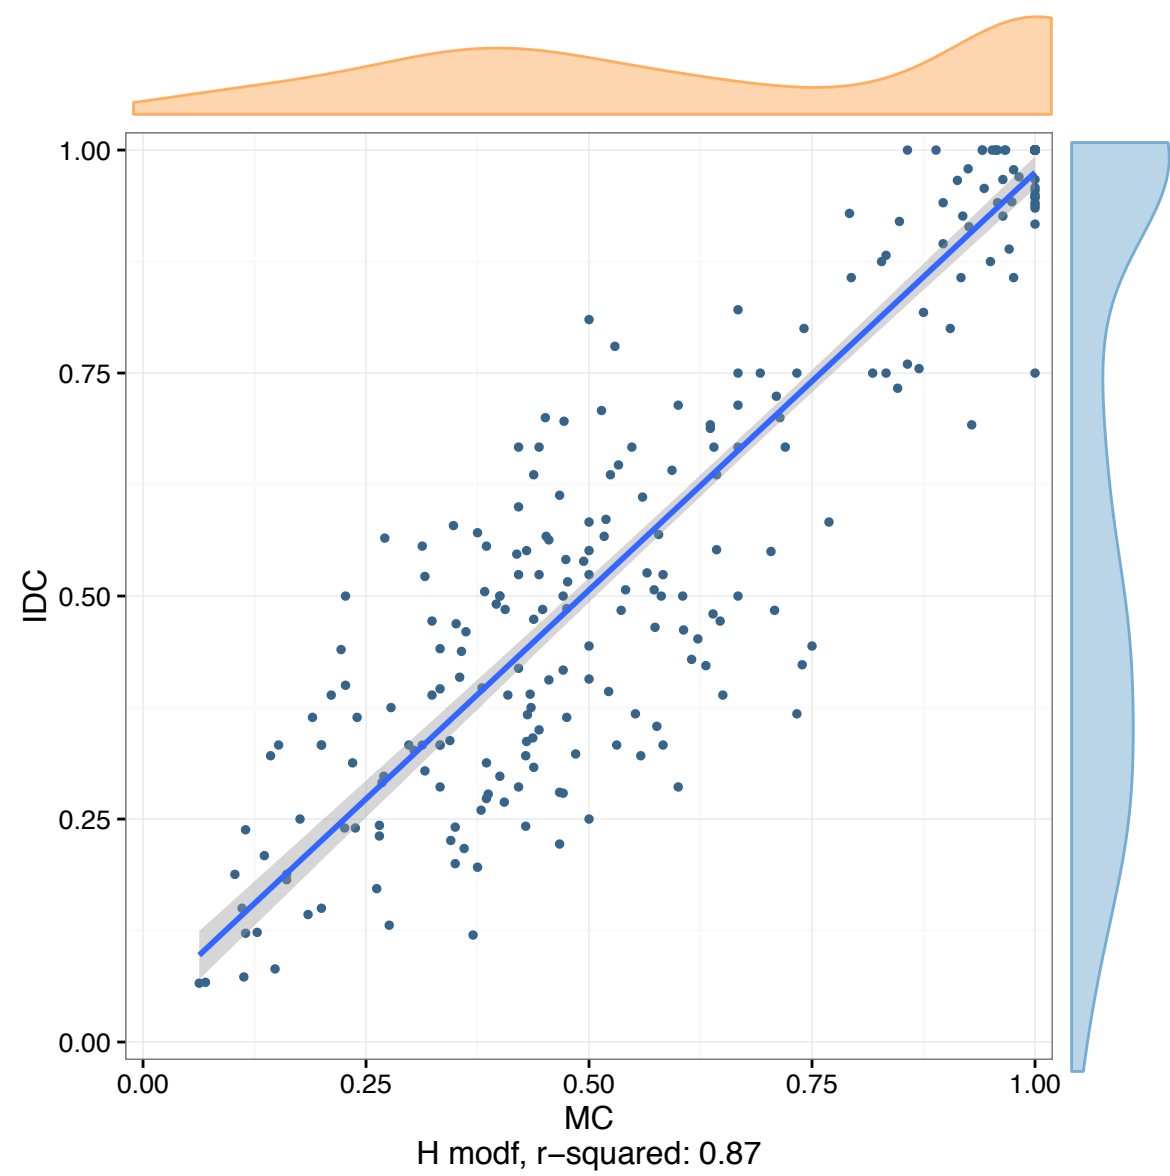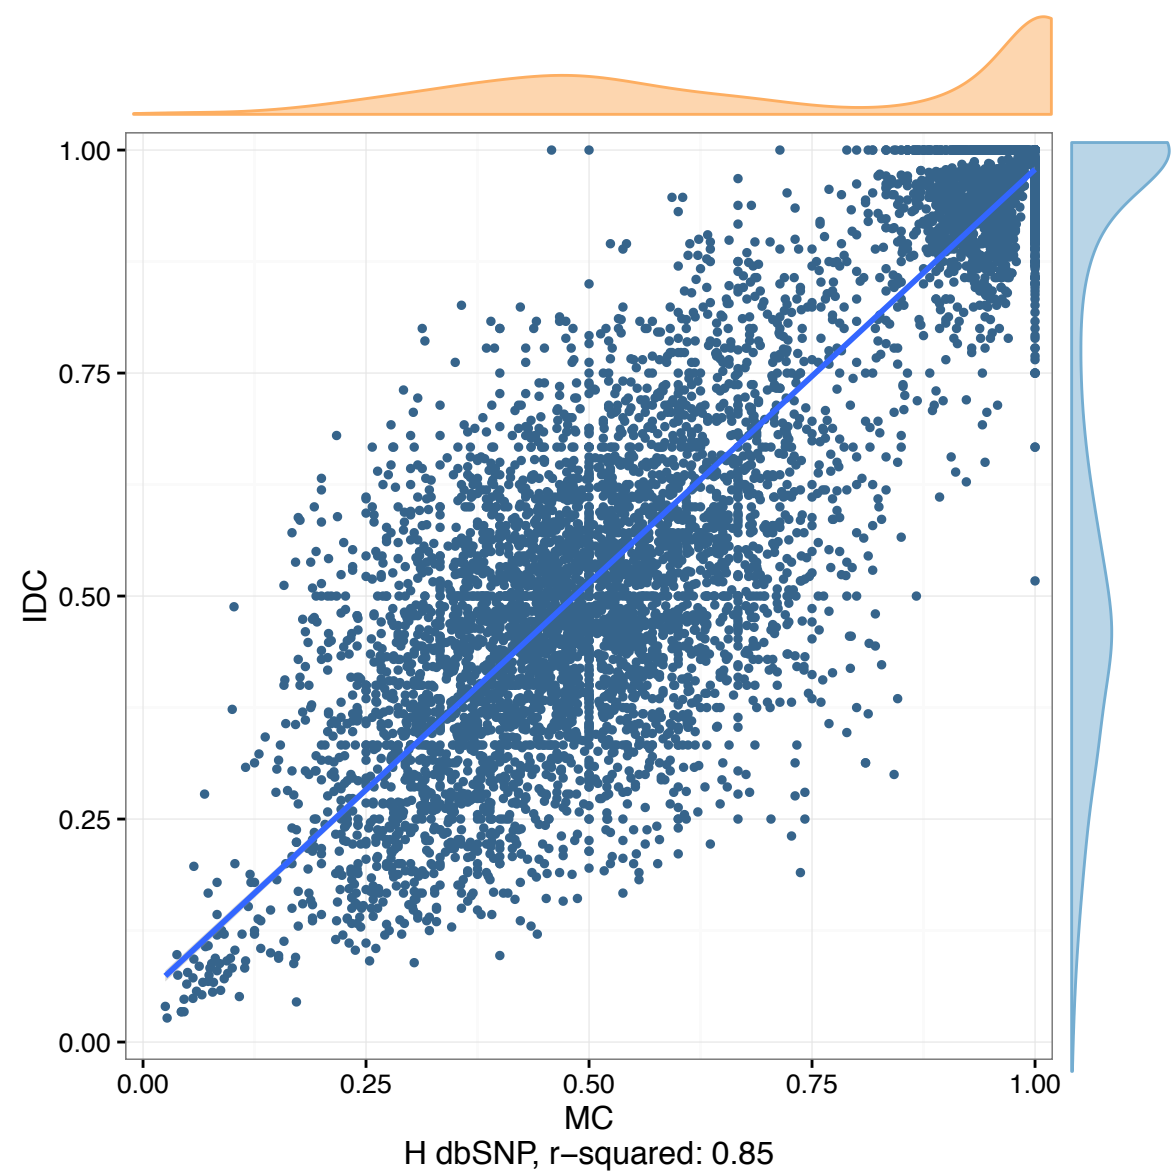

Supplement: NIHMS869886-supplement-4.pdf [file NIHMS869886-supplement-4.pdf]

A\_MC vs A\_IDC

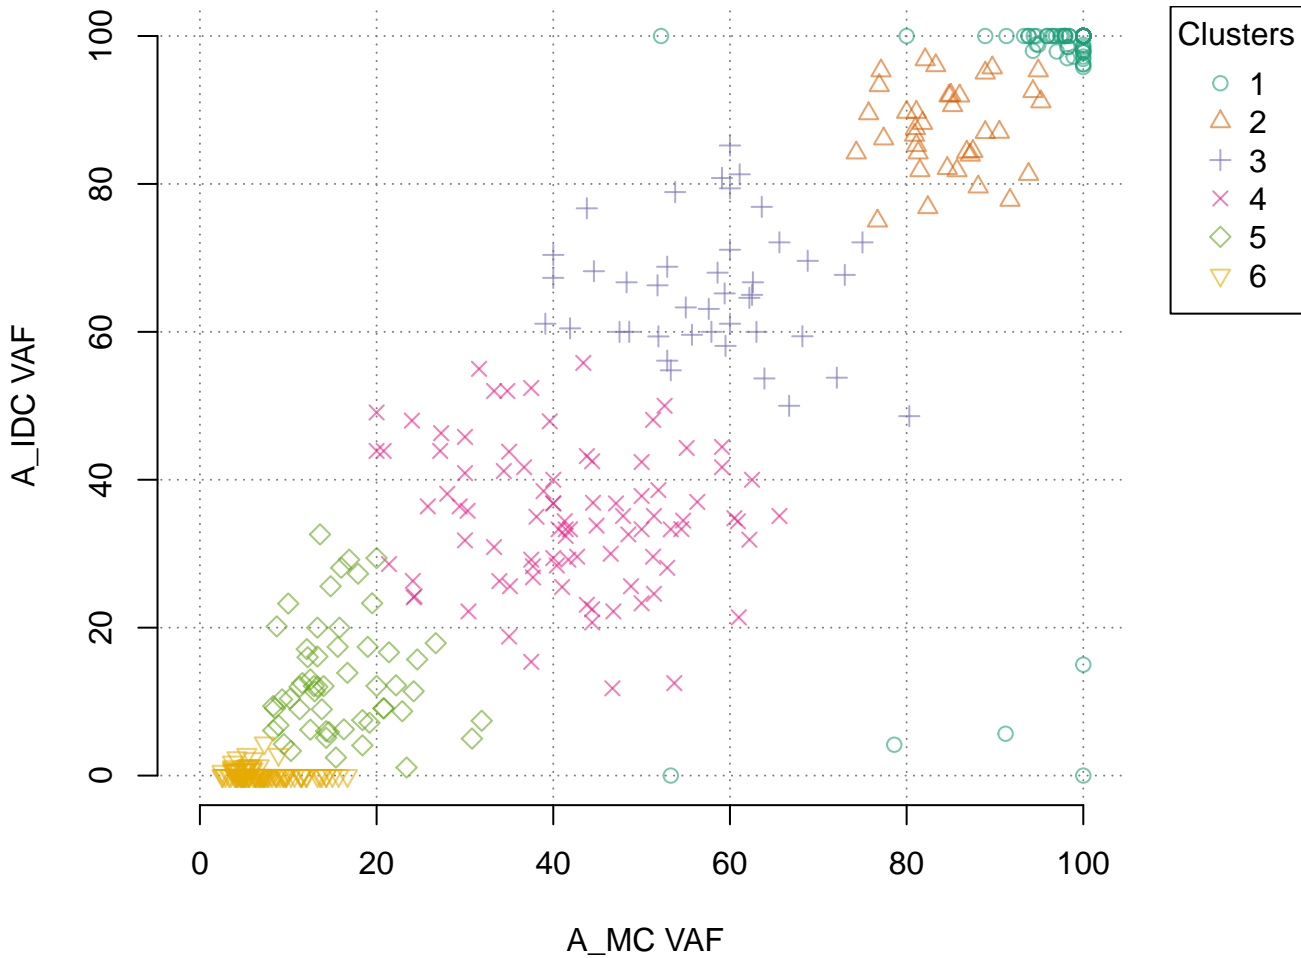

# B\_MC vs B\_IDC

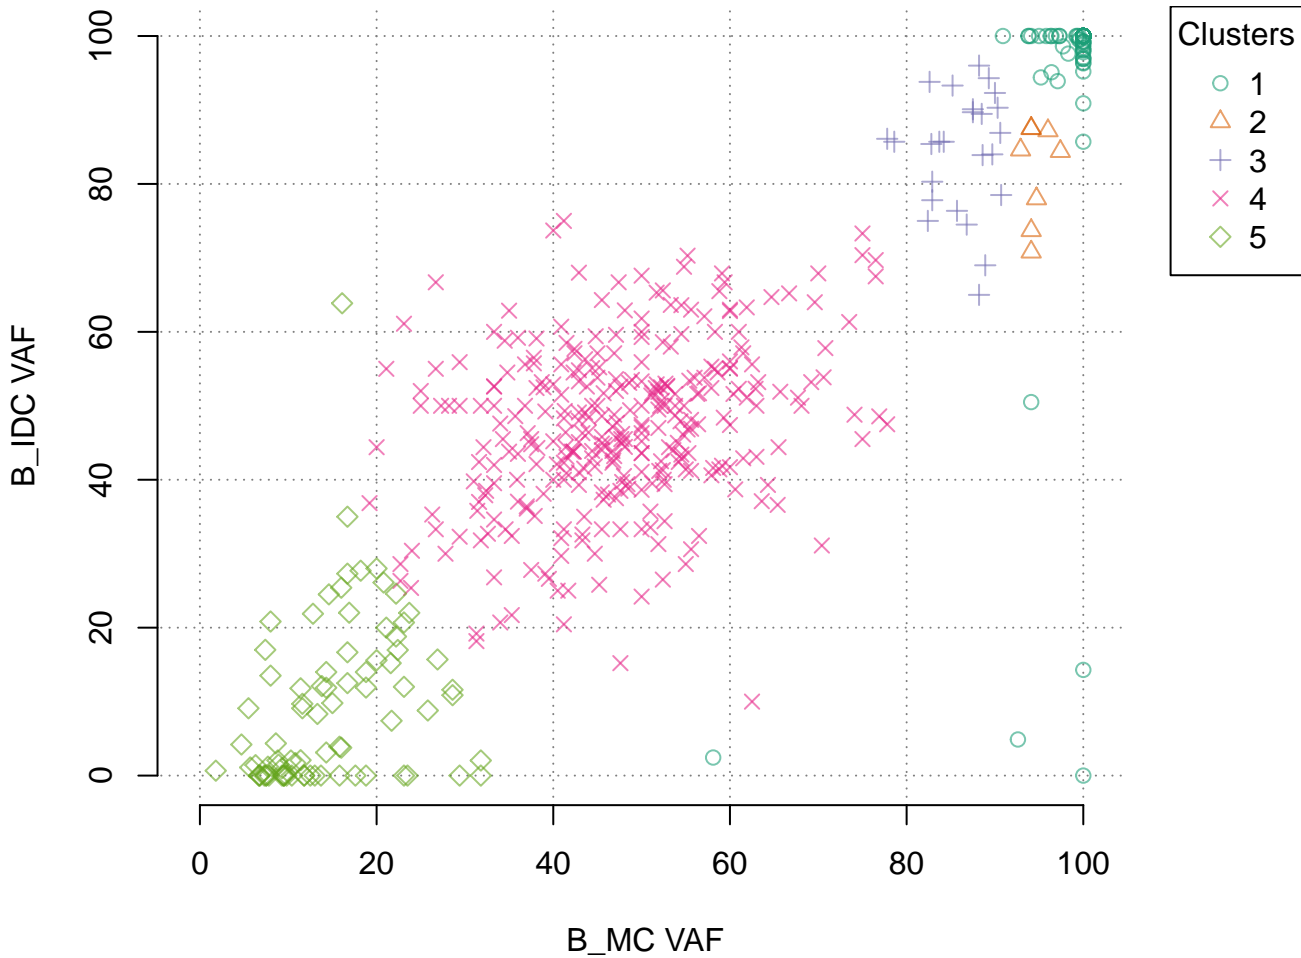

# C\_MC vs C\_IDC

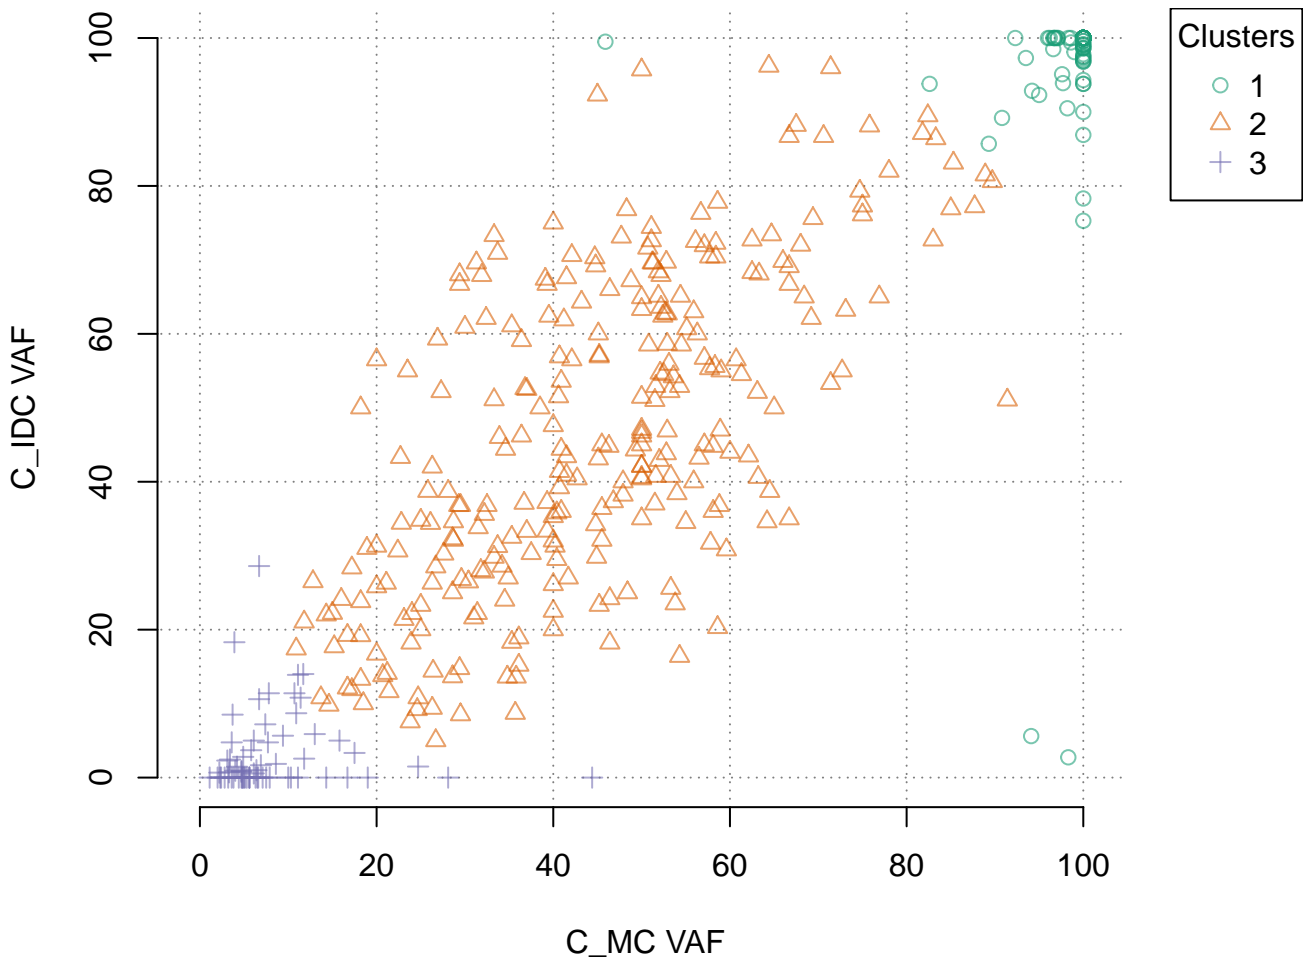

# D\_MC vs D\_IDC

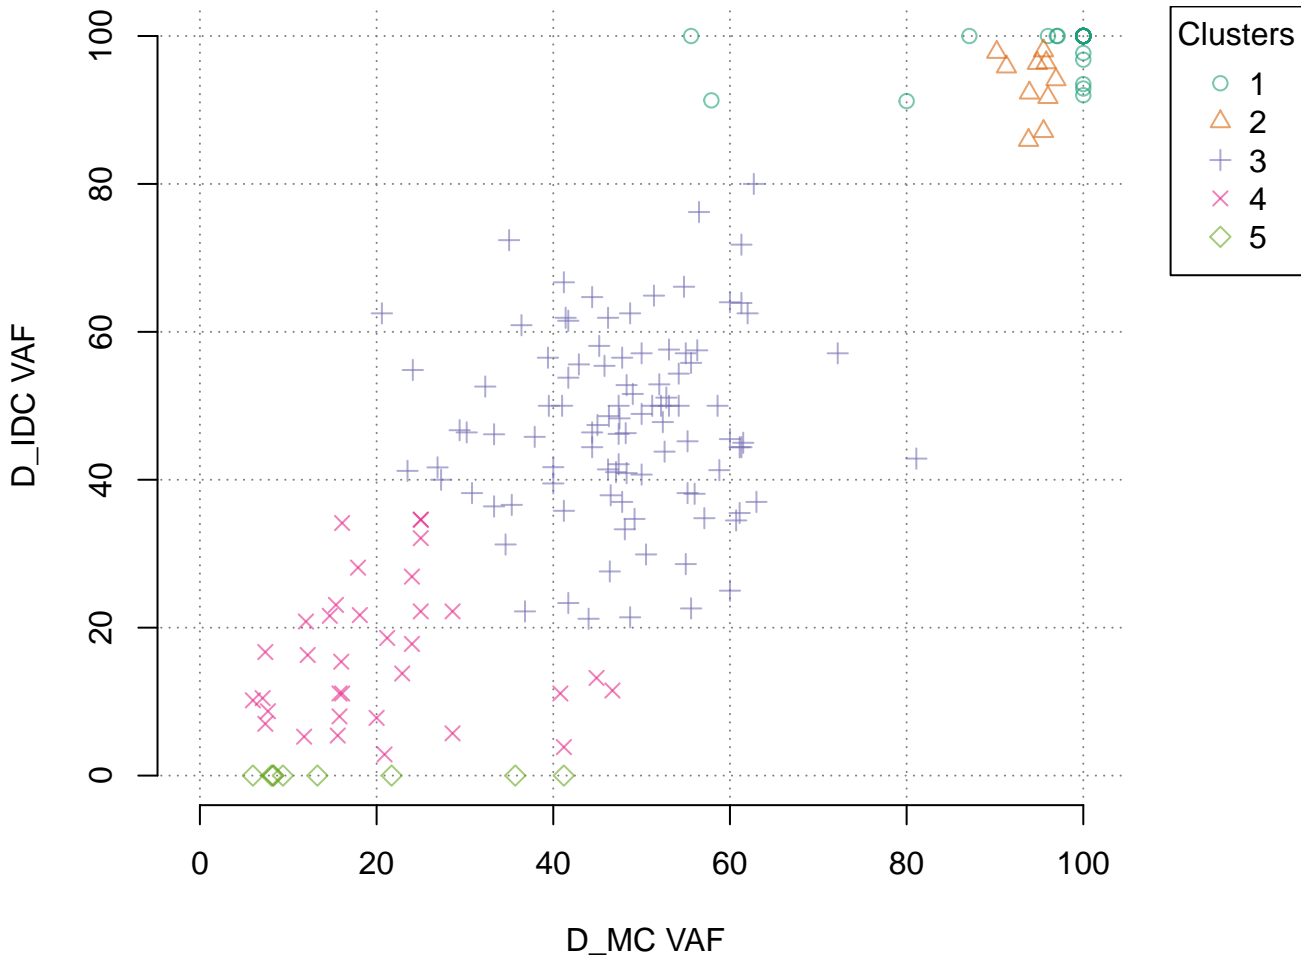

# E\_MC vs E\_IDC

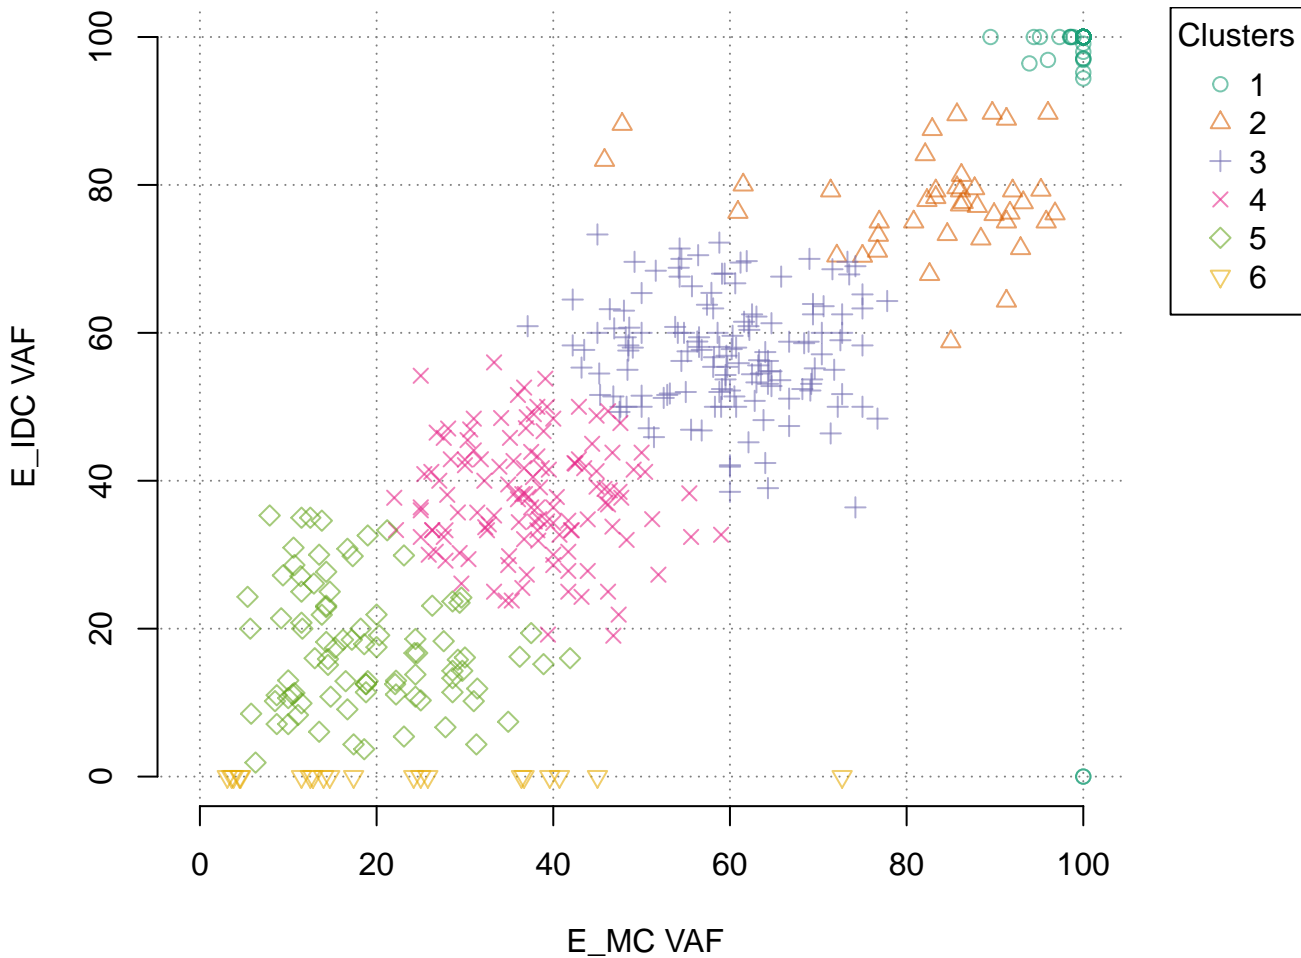

# F\_MC vs F\_IDC

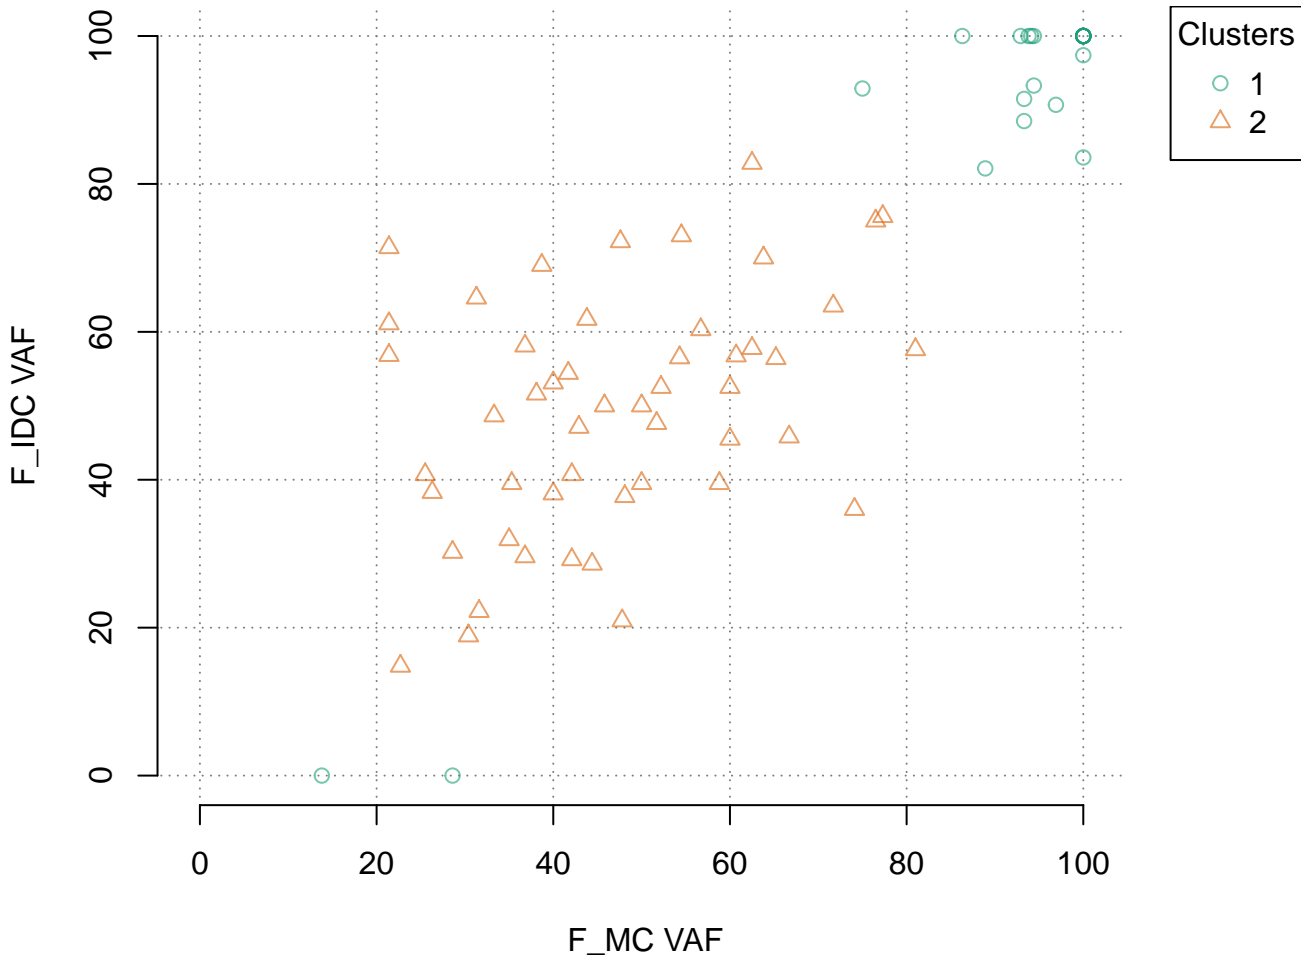

# G\_MC vs G\_IDC

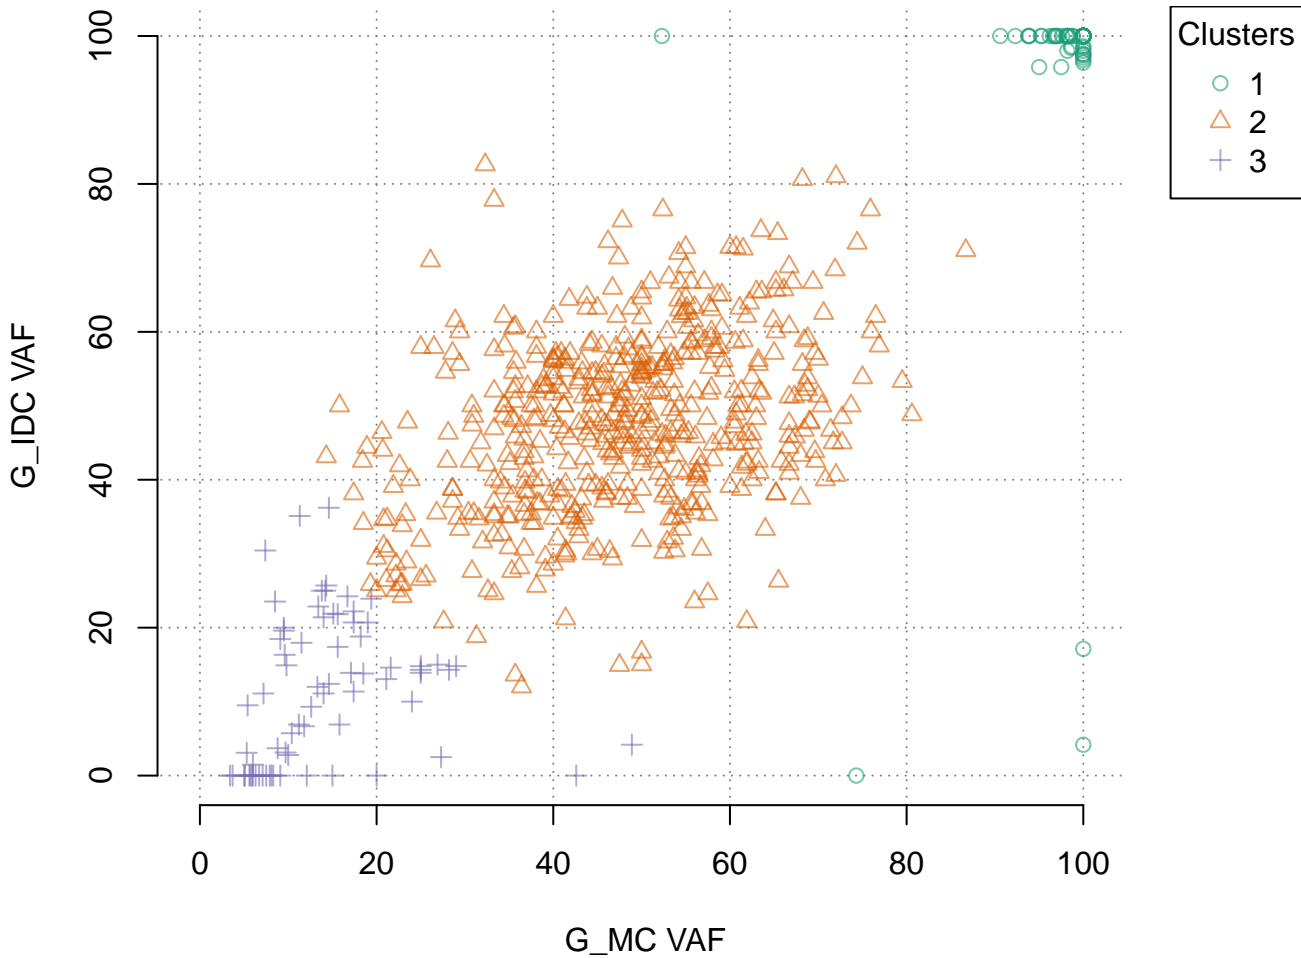

# H\_MC vs H\_IDC

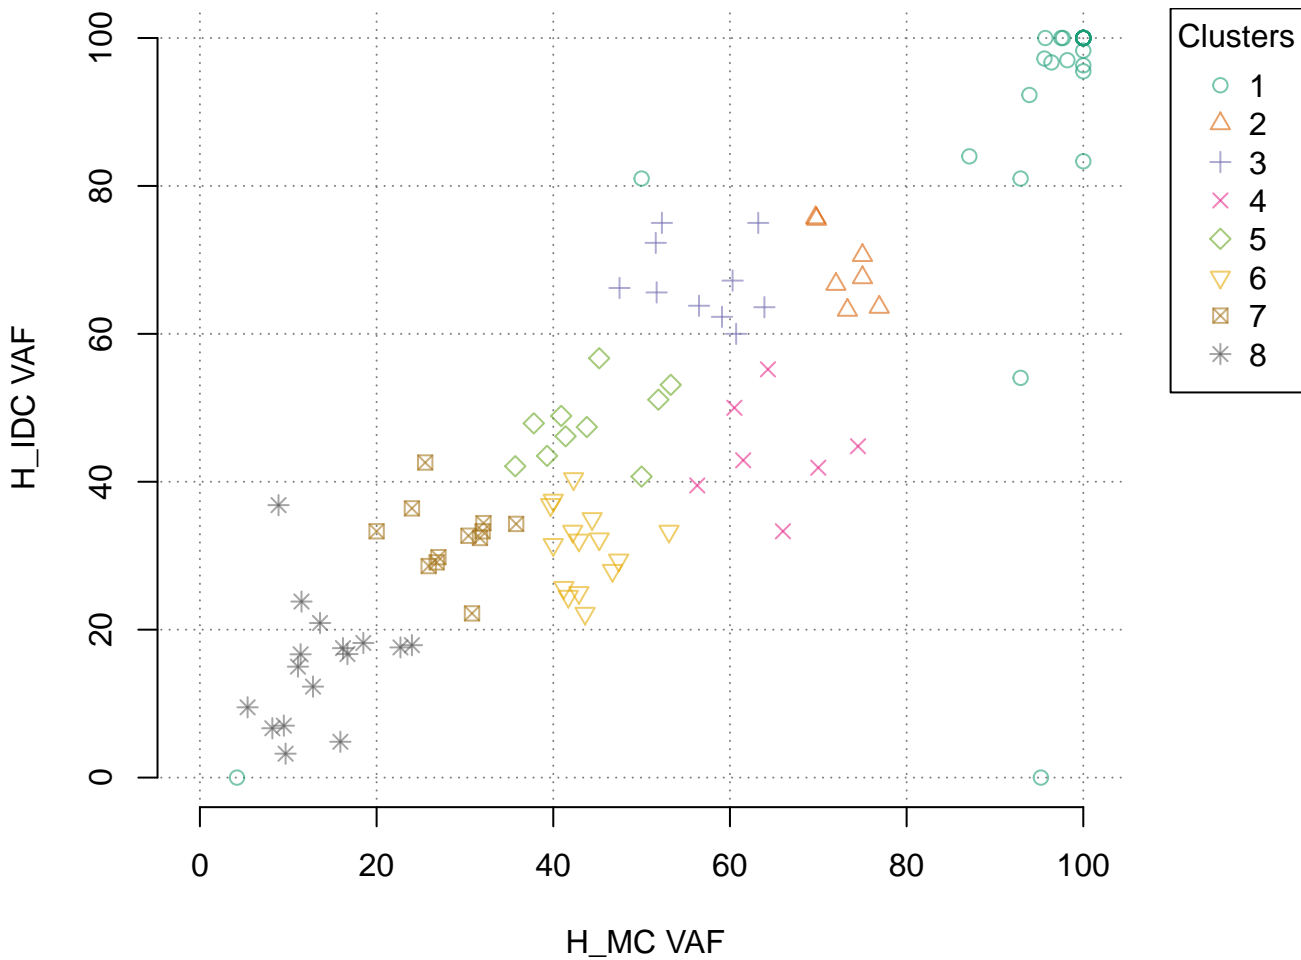

Supplement: NIHMS869886-supplement-5.pdf [file NIHMS869886-supplement-5.pdf]
